# Supplementary material for: Hydrogen bond donor–acceptor–donor organocatalysis for conjugate addition of benzylidene barbiturates via complementary DAD–ADA hydrogen bonding
Source: Royal Society of Chemistry journal article supplement (doi:10.1039/c4ra04020a), 2014-01-01

**Hydrogen Bond Donor-Acceptor-Donor Organocatalysis  
for Conjugate Addition of Benzylidene Barbiturates via  
Complementary DAD-ADA Hydrogen Bonding**

Franco King-Chi Leung, Jian-Fang Cui, Tsz-Wai Hui, Zhong-Yuan Zhou and  
Man-Kin Wong\*

*State Key Laboratory of Chirosciences and Department of Applied Biology and Chemical  
Technology, The Hong Kong Polytechnic University, Hung Hom, Hong Kong, China*

**Supporting Information**

## **General Methods**

Chemicals purchased from commercial sources were used without further purification. Flash column chromatography was performed using silica gel 60 (230-400 mesh ASTM) with ethyl acetate/n-hexane as eluent. Melting points were recorded by Bamstead Electrothermal 9100.  $^1\text{H}$  NMR and  $^{13}\text{C}$  NMR spectra were recorded on Varian AS-400 or Varian AS-500 or Bruker DPX-400 spectrometers. Chemical shifts (ppm) were referenced to TMS and coupling constants are given in Hz. Data for  $^1\text{H}$  NMR are recorded as follows: chemical shift ( $\delta$ , ppm), multiplicity (s, singlet; br s, broad singlet; d, doublet; dd, double doublet; br d, broad doublet; t, triplet; m, multiplet), coupling constant (Hz), integration. Data for  $^{13}\text{C}$  NMR are reported in terms of chemical shift ( $\delta$ , ppm). IR spectra were recorded on a FT-IR Nicolet-380 spectrometer. Low resolution mass spectra (MS) and high resolution mass spectra (HR-MS) were measured on Waters Q-TOF 2<sup>TM</sup> with a positive ESI source. X-ray crystal structures were obtained by Bruker CCD area detector diffractometer. UV/Vis. titration experiments were monitored by Hewlett Packard 8453 Photo-diode Array UV-Visible spectrometer.

**General Procedure for Synthesis of HB-DAD Organocatalysts 1a and 3a:** A mixture of 2,6-diamino-N-heterocyclic compounds (1.0 mmol) and trifluoroacetic anhydride (3.0 mmol) in  $\text{CH}_2\text{Cl}_2$  (10 mL) was stirred under nitrogen atmosphere at room temperature for 24 h. The reaction mixture was added with water (5 mL) and extracted with ethyl acetate ( $3 \times 10$  mL). The combined organic layers were dried over anhydrous  $\text{Na}_2\text{SO}_4$ , filtered, and concentrated. The residue was purified by flash column chromatography on silica gel using ethyl acetate-hexane as eluent to give **1a** (58% yield) and **3a** (68% yield).

**General Procedure for Synthesis of HB-DAD Organocatalysts 1b, 1c, 3b and 3c:** A mixture of 2,6-diamino-N-heterocyclic compounds (1.0 mmol), acid chloride (2.5 mmol), 4-dimethylaminopyridine (0.2 mmol) and triethylamine (2.5 mmol) in  $\text{CH}_2\text{Cl}_2$  (10 mL) was stirred under nitrogen atmosphere at room temperature for 24 h. The reaction mixture was treated with water (5 mL) and extracted with ethyl acetate ( $3 \times 10$  mL). The combined organic layers were dried over anhydrous  $\text{Na}_2\text{SO}_4$ , filtered, and concentrated. The residue was purified by flash column chromatography on silica gel using ethyl acetate-hexane as eluent to give **1b** (15% yield), **1c** (62% yield), **3b** (58% yield) and **3c** (62% yield).

**General Procedure for Synthesis of Benzylidene Barbiturates:** A mixture of barbiturate acid (2.0 mmol) and benzaldehyde (2.0 mmol) in EtOH (10 mL) was refluxed for 2-12 h. The reaction mixture was allowed to cool to room temperature and filtered to obtain solid /

crystalline crude products. The residue was purified by flash column chromatography on silica gel using ethyl acetate-hexane as eluent to give benzylidene barbiturates in 24-95% yield.

**Procedure for Catalytic Conjugate Addition of Benzylidene Barbiturates:** A mixture of benzylidene barbiturates **5** (0.05 mmol), 2-methylfuran (0.05 mmol) and HB-DAD organocatalyst (0.01 mmol) in CH<sub>2</sub>Cl<sub>2</sub> (1 mL) was stirred at 25 °C for 24 h. The product yield was determined by crude <sup>1</sup>H NMR with toluene (0.02 mmol) as internal standard. The reaction mixture was concentrated. The residue was purified by flash column chromatography on silica gel using ethyl acetate-hexane as eluent to obtain isolated yield.

## Optimization of Reaction Conditions of **1a**-Catalyzed Conjugate Addition of **5a** with 2-Methylfuran

As depicted in Table S1, a series of polar aprotic solvents gave good yield (entries 1-3). Particularly, the **1a**-catalyzed conjugate addition of **5a** in CH<sub>2</sub>Cl<sub>2</sub> gave 61% yield (entry 1). The yield was further improved in the conjugate addition of **5a** using dried CH<sub>2</sub>Cl<sub>2</sub> as solvent (3.0; entry 4). However, no yield increase of the reaction was observed in 48 h (2.0; entry 5). In addition, no yield increase in the reaction was observed using acetone and toluene as solvents (entries 6 and 7). In this connection, CH<sub>2</sub>Cl<sub>2</sub> was selected as solvent system for subsequent studies.

**Table S1.** Effect of solvent in **1a**-catalyzed conjugate addition of **5a**<sup>[a]</sup>

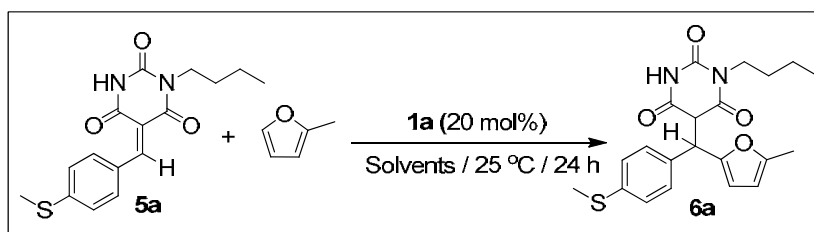

| Entry <sup>[a]</sup> | Solvent                         | NMR Yield (%) <sup>[b]</sup> | Background NMR Yield (%) <sup>[b, c]</sup> |
|----------------------|---------------------------------|------------------------------|--------------------------------------------|
| 1                    | CH <sub>2</sub> Cl <sub>2</sub> | 61                           | 28                                         |
| 2                    | CHCl <sub>3</sub>               | 51                           | 24                                         |
| 3                    | CH <sub>3</sub> CN              | 21                           | 16                                         |
| 4 <sup>[d]</sup>     | CH <sub>2</sub> Cl <sub>2</sub> | 69                           | 23                                         |
| 5 <sup>[e]</sup>     | CH <sub>2</sub> Cl <sub>2</sub> | 60                           | 30                                         |
| 6                    | Acetone                         | 14                           | 14                                         |
| 7 <sup>[f]</sup>     | Toluene                         | trace                        | trace                                      |

<sup>[a]</sup> Reaction conditions: **5a** (0.05 mmol), 2-methylfuran (0.05 mmol), **1a** (0.01 mmol), solvents (1 mL), 25 °C, 24 h. <sup>[b]</sup> Yields were determined by <sup>1</sup>H NMR of the crude product using toluene as the internal standard. <sup>[c]</sup> Without addition of **1a**. <sup>[d]</sup> Dried CH<sub>2</sub>Cl<sub>2</sub>. <sup>[e]</sup> For 48 h. <sup>[f]</sup> Ethyl acetate as the internal standard.

The conjugate addition of **5a**, using 50 mol% and 20 mol% of **1a**, gave 62% and 61% yield (Table S2; entries 1-2). A lower yield (49%) was observed in using of 10 mol% of **1a** (entry 3). No yield increase was observed in using 5 mol% of **1a** (entry 4). In this connection, using 20 mol% of **1a** in catalyzed conjugate addition of **5a** is more effective than using 50 mol% of **1a** in the reaction because of the same yield obtained in using of a lower quantity of **1a**.

**Table S2.** Effect of catalyst loading in **1a**-catalyzed conjugate addition of **5a**<sup>[a]</sup>

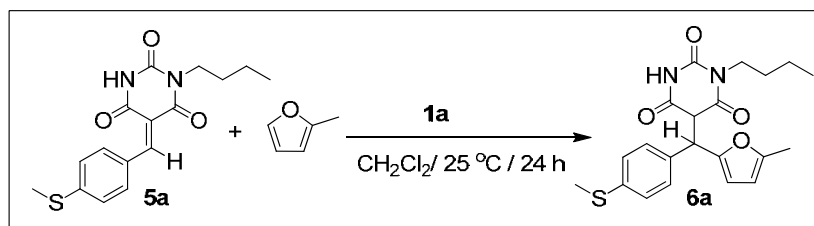

| Entry <sup>[a]</sup> | Catalyst Loading (mol%) | NMR Yield (%) <sup>[b]</sup> |
|----------------------|-------------------------|------------------------------|
| 1                    | 50                      | 62                           |
| 2                    | 20                      | 61                           |
| 3                    | 10                      | 49                           |
| 4                    | 5                       | 28                           |
| 5                    | 0                       | 28                           |

<sup>[a]</sup> Reaction conditions: **5a** (0.05 mmol), 2-methylfuran (0.05 mmol), **1a** (0.05-0.5 equiv.), CH<sub>2</sub>Cl<sub>2</sub> (1 mL), 25 °C, 24 h. <sup>[b]</sup> Yields were determined by <sup>1</sup>H NMR of the crude product using toluene as the internal standard.

Only trace amount of **5a** was obtained in -20 °C of the conjugate addition of **5a** (Table S3; entry 1). 25% yield was afforded when the present reaction was conducted in 0 °C (entry 2). The **1a**-catalyzed conjugate addition of **5a** worked smoothly in 25 °C to give good yield of adduct **6a** (entry 3). However, the no significant yield increase in the reaction carried at 40 °C (entry 4) and the background NMR yield (49%) increased observably. In balancing the yield of conjugate addition of **5a**, the subsequent studies of HB-DAD catalyzed conjugate addition could be performed in 25 °C.

**Table S3.** Effect of reaction temperature in **1a**-catalyzed conjugate addition of **5a**<sup>[a]</sup>

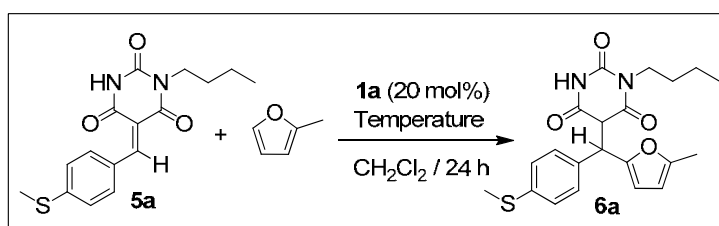

| Entry <sup>[a]</sup> | Temperature (°C) | NMR Yield (%) <sup>[b]</sup> | Background NMR Yield (%) <sup>[b, c]</sup> |
|----------------------|------------------|------------------------------|--------------------------------------------|
| 1                    | -20              | trace                        | trace                                      |
| 2                    | 0                | 25                           | 10                                         |
| 3                    | 25               | 61                           | 28                                         |
| 4                    | 40               | 62                           | 49                                         |

<sup>[a]</sup> Reaction conditions: **5a** (0.05 mmol), 2-methylfuran (0.05 mmol), **1a** (0.01 mmol), CH<sub>2</sub>Cl<sub>2</sub> (1 mL), 24 h. <sup>[b]</sup> Yields were determined by <sup>1</sup>H NMR of the crude product using toluene as the internal standard. <sup>[c]</sup> Without addition of **1a**.

## Substrate Scope - Conjugate Additions of Benylidene Barbiturate with other Nucleophiles

We attempted to extend the substrate scope of **1a**-catalyzed conjugate addition of **5a** with different nucleophiles (Table S4). Using **5a** and nucleophiles including 1-methylindole, indole and 5-methoxyindole, the corresponding adducts (**6p-6r**) were obtained with lower yield in the presence of **1a** than without **1a** (entries 1-3). However, the conjugate additions of **5a** with thiophene, dibenzoylmethane and ethylbenzoylacetate gave no conversion of starting materials (entries 4-6).

**Table S4.** Substrate scope of **1a**-catalyzed conjugate addition of **5a** with other nucleophiles

| Entry <sup>[a]</sup> | Nucleophiles                                                                        | Product   | NMR Yield (%) <sup>[b]</sup> | Background NMR Yield (%) <sup>[b, c]</sup> |
|----------------------|-------------------------------------------------------------------------------------|-----------|------------------------------|--------------------------------------------|
| 1                    | 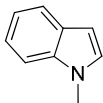  | <b>6p</b> | 62                           | 72                                         |
| 2                    |  | <b>6q</b> | 63                           | 76                                         |
| 3                    |  | <b>6r</b> | 39                           | 45                                         |
| 4                    |  | <b>6s</b> | 0                            | 0                                          |
| 5                    |  | <b>6t</b> | 0                            | 0                                          |
| 6                    |  | <b>6u</b> | 0                            | 0                                          |

<sup>[a]</sup> Reaction conditions: **5a** (0.05 mmol), Nucleophile (0.05 mmol), **1a** (0.01 mmol), CH<sub>2</sub>Cl<sub>2</sub> (1 mL), 25 °C, 24 h. <sup>[b]</sup> Yields were determined by <sup>1</sup>H NMR of the crude product using toluene as the internal standard. <sup>[c]</sup> Without addition of **1a**

We studied the substrate scope of thiourea A-catalyzed conjugate addition of **5a** with different nucleophiles (Table S5). Using **5a** and nucleophiles including 1-methylindole, indole and 5-methoxyindole, the corresponding adducts (**6p-6r**) were obtained were also obtained with lower yield in the presence of thiourea A than without thiourea A (entries 1-3). However, the conjugate additions of **5a** with thiophene, dibenzoylmethane and ethylbenzylacetate gave no conversion of starting materials (entries 4-6).

**Table S5.** Substrate scope of Thiourea A-catalyzed conjugate addition of **5a** with other nucleophiles

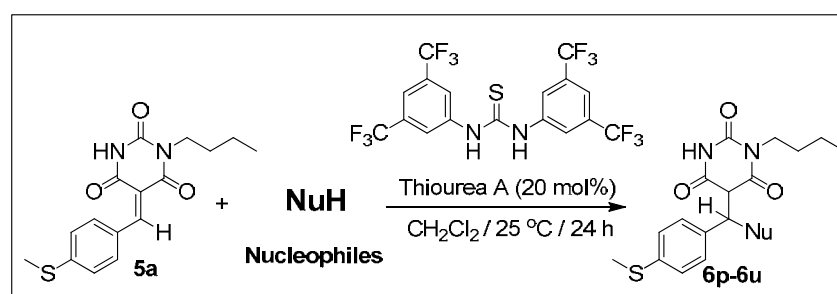

| Entry <sup>[a]</sup> | Nucleophiles | Product   | NMR Yield (%) <sup>[b]</sup> | Background NMR Yield (%) <sup>[b, c]</sup> |
|----------------------|--------------|-----------|------------------------------|--------------------------------------------|
| 1                    |              | <b>6p</b> | 52                           | 72                                         |
| 2                    |              | <b>6q</b> | 62                           | 76                                         |
| 3                    |              | <b>6r</b> | 35                           | 45                                         |
| 4                    |              | <b>6s</b> | 0                            | 0                                          |
| 5                    |              | <b>6t</b> | 0                            | 0                                          |
| 6                    |              | <b>6u</b> | 0                            | 0                                          |

<sup>[a]</sup> Reaction conditions: **5a** (0.05 mmol), Nucleophile (0.05 mmol), Thiourea A (0.01 mmol),  $\text{CH}_2\text{Cl}_2$  (1 mL),  $25\text{ }^\circ\text{C}$ , 24 h. <sup>[b]</sup> Yields were determined by  $^1\text{H}$  NMR of the crude product using toluene as the internal standard. <sup>[c]</sup> Without addition of **1a**.



## Literature Reference of 2a-c, 4a-4c, 9 and Thiourea A

| Compounds                                                                                                                                | Reference                                                                                                                                                      |
|------------------------------------------------------------------------------------------------------------------------------------------|----------------------------------------------------------------------------------------------------------------------------------------------------------------|
| 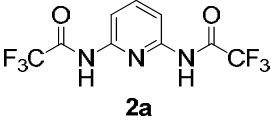 <p style="text-align: center;"><b>2a</b></p>           | I. Bolz, D. Schaarschmidt, T. Ruffer, H. Lang and S. Spange, <i>Angew. Chem. Int. Ed.</i> , 2009, <b>48</b> , 7440.                                            |
|  <p style="text-align: center;"><b>2b</b></p>           | D. Benito-Garagorri, E. Becker, J. Wiedermann, W. Lackner, M. Pollak, K. Mereiter, J. Kisala and K. Kirchner, <i>Organometallics</i> , 2006, <b>25</b> , 1900. |
|  <p style="text-align: center;"><b>2c</b></p>           | Z. Xu, P. Daka, I. Budik, H. Wang, F. Q. Bai and H. X. Zhang, <i>Eur. J. Org. Chem.</i> , 2009, 4581.                                                          |
|  <p style="text-align: center;"><b>4a</b></p>           | M. Habel, C. Niederalt, S. Grimme, M. Nieger and F. Vogtle, <i>Eur. J. Org. Chem.</i> , 1998, 1471.                                                            |
|  <p style="text-align: center;"><b>4b</b></p>          | J. Barluenga, J. M. Álvarez-Gutiérrez, A. Ballesteros and J. M. González, <i>Angew. Chem. Int. Ed.</i> , 2007, <b>46</b> , 1281.                               |
|  <p style="text-align: center;"><b>4c</b></p>         | J. Barluenga, J. M. Álvarez-Gutiérrez, A. Ballesteros and J. M. González, <i>Angew. Chem. Int. Ed.</i> , 2007, <b>46</b> , 1281.                               |
|  <p style="text-align: center;"><b>9</b></p>          | M. Bauer and S. Spange, <i>Angew. Chem. Int. Ed.</i> 2011, <b>50</b> , 9727.                                                                                   |
|  <p style="text-align: center;"><b>Thiourea A</b></p> | K. M. Lippert, K. Hof, D. Gerbig, D. Ley, H. Hausmann, S. Guenther and P. R. Schreiner, <i>Eur. J. Org. Chem.</i> 2012, 5919.                                  |

## Characterizations

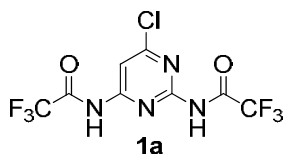

Transparent crystal, analytical TLC (silica gel 60) (25% ethyl acetate in *n*-hexane)  $R_f = 0.6$ ; 58% isolated yield; M.p. 80.0-81.6 °C;  $^1\text{H}$  NMR (400 MHz,  $\text{CDCl}_3$ )  $\delta$  11.84 (br s, 1H), 10.94 (br s, 1H), 7.95 (s, 1H);  $^{13}\text{C}$  NMR (100 MHz,  $d^6$ -Acetone)  $\delta$  162.6, 158.80, 156.5 (q,  $^2J_{\text{CF}} = 39.4$ ), 155.8, 154.1 (q,  $^2J_{\text{CF}} = 38.6$ ), 115.4 (q,  $^1J_{\text{CF}} = 286.7$ ), 115.3 (q,  $^1J_{\text{CF}} = 285.8$ ), 107.1; IR  $\nu_{\text{max}}$  ( $\text{cm}^{-1}$ ) 3598, 3502, 1732, 1679; ESIMS  $m/z$  337 [ $\text{M}+\text{H}^+$ ]; HRMS (ESI) for  $\text{C}_8\text{H}_4\text{N}_4\text{O}_2\text{Cl}$  [ $\text{M}+\text{H}^+$ ] calcd: 336.9927, found: 336.9935; X-ray crystallography obtained.

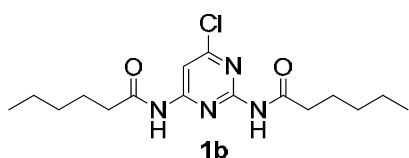

White solid, analytical TLC (silica gel 60) (25% ethyl acetate in *n*-hexane)  $R_f = 0.6$ ; 15% isolated yield; M.p. 198.7-202.5 °C;  $^1\text{H}$  NMR (400 MHz,  $\text{CDCl}_3$ )  $\delta$  10.89 (br s, 1H), 9.66 (br s, 1H), 8.08 (s, 1H), 2.98 (br s, 2H), 2.51-5.54 (m, 2H), 1.70-1.74 (m, 4H), 1.36-1.39 (m, 8H), 0.91-0.94 (m, 6H);  $^{13}\text{C}$  NMR (100 MHz,  $\text{CDCl}_3$ )  $\delta$  177.8, 174.4, 162.6, 160.5, 156.4, 105.1, 37.50, 37.49, 31.62, 31.55, 25.1, 24.7, 22.7, 22.6, 14.13, 14.10; IR  $\nu_{\text{max}}$  ( $\text{cm}^{-1}$ ) 3281, 1716, 1671; ESIMS  $m/z$  341 [ $\text{M}+\text{H}^+$ ]; HRMS (ESI) for  $\text{C}_{16}\text{H}_{26}\text{N}_4\text{O}_2\text{Cl}$  [ $\text{M}+\text{H}^+$ ] calcd: 341.1744, found: 341.1740.

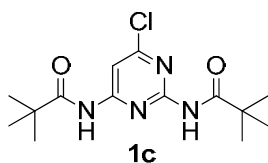

White solid, analytical TLC (silica gel 60) (25% ethyl acetate in *n*-hexane)  $R_f = 0.6$ ; 62% isolated yield; M.p. 128.0-129.9 °C;  $^1\text{H}$  NMR (400 MHz,  $d^6$ -Acetone)  $\delta$  10.11 (br s, 1H), 9.01 (br s, 1H), 7.92 (s, 1H), 1.34 (s, 9H), 1.32 (s, 9H);  $^{13}\text{C}$  NMR (100 MHz,  $d^6$ -Acetone)  $\delta$  178.6, 176.0, 161.6, 160.7, 157.3, 104.0, 40.3, 40.2, 26.6, 26.4; IR  $\nu_{\text{max}}$  ( $\text{cm}^{-1}$ ) 3576, 3479, 1697; ESIMS  $m/z$  313 [ $\text{M}+\text{H}^+$ ]; HRMS (ESI) for  $\text{C}_{14}\text{H}_{21}\text{N}_4\text{O}_2\text{ClNa}$  [ $\text{M}+\text{Na}^+$ ] calcd: 335.1251, found: 335.1241.

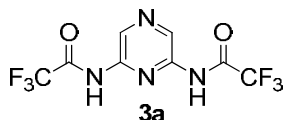

White solid, analytical TLC (silica gel 60) (25% ethyl acetate in *n*-hexane)  $R_f = 0.4$ ; 68% isolated yield; M.p. 194.2-195.8 °C;  $^1\text{H NMR}$  (400 MHz,  $d^6$ -Acetone)  $\delta$  11.00-11.02 (br s, 2H), 9.19 (s, 2H);  $^{13}\text{C NMR}$  (100 MHz,  $d^6$ -Acetone)  $\delta$  155.62 (q,  $^2J_{\text{CF}} = 40.8$ ), 145.1, 134.0, 115.9 (q,  $^1J_{\text{CF}} = 228.8$ ); IR  $\nu_{\text{max}}$  ( $\text{cm}^{-1}$ ) 3349, 3320, 1752, 1734; ESIMS  $m/z$  303 [ $\text{M}+\text{H}^+$ ].

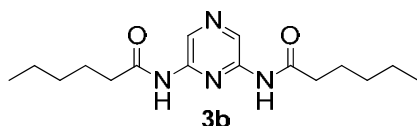

White solid, analytical TLC (silica gel 60) (ethyl acetate)  $R_f = 0.1$ ; 58% isolated yield; M.p. 273.9-275.7 °C;  $^1\text{H NMR}$  (400 MHz,  $d^6$ -DMSO)  $\delta$  10.35 (br s, 2H), 8.97 (s, 2H), 2.43 (t,  $J = 7.0$  Hz, 4H), 1.55-1.62 (m, 4H), 1.26-1.29 (m, 8H), 0.87 (t,  $J = 6.5$  Hz, 6H);  $^{13}\text{C NMR}$  (100 MHz,  $d^6$ -DMSO)  $\delta$  172.5, 146.6, 130.6, 35.8, 30.8, 24.6, 21.9, 13.9; IR  $\nu_{\text{max}}$  ( $\text{cm}^{-1}$ ) 3336, 1685; ESIMS  $m/z$  307 [ $\text{M}+\text{H}^+$ ]; HRMS (ESI) for  $\text{C}_{16}\text{H}_{27}\text{N}_4\text{O}_2$  [ $\text{M}+\text{H}^+$ ] $^+$  calcd: 307.2134, found: 307.2149.

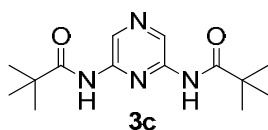

White solid, analytical TLC (silica gel 60) (50% ethyl acetate in *n*-hexane)  $R_f = 0.5$ ; 62% isolated yield; M.p. 147.6-149.1 °C;  $^1\text{H NMR}$  (400 MHz,  $\text{CDCl}_3$ )  $\delta$  9.28 (s, 1H), 1.34 (s, 18H);  $^{13}\text{C NMR}$  (100 MHz,  $\text{CDCl}_3$ )  $\delta$  176.9, 145.8, 131.6, 40.0, 27.6; IR  $\nu_{\text{max}}$  ( $\text{cm}^{-1}$ ) 3420, 1701; ESIMS  $m/z$  279 [ $\text{M}+\text{H}^+$ ]; HRMS (ESI) for  $\text{C}_{14}\text{H}_{23}\text{N}_4\text{O}_2$  [ $\text{M}+\text{H}^+$ ] $^+$  calcd: 279.1821, found: 279.1808.

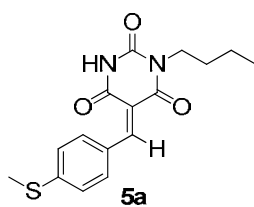

*E* / *Z* mixture

Yellow crystal, analytical TLC (silica gel 60) (25% ethyl acetate in *n*-hexane)  $R_f = 0.5$ ; 73% isolated yield; M.p. 159.4-160.7 °C;  $^1\text{H NMR}$  (400 MHz,  $\text{CDCl}_3$ )  $\delta$  8.51 (br s, 2H), 8.22 (d,  $J = 8.0$  Hz, 2H), 7.28 (d,  $J = 8.0$  Hz, 2H), 3.94-3.98 (m, 2H), 2.55 (s, 3H), 1.65-1.68 (m, 2H), 1.38-1.40 (m, 2H), 0.97 (t,  $J = 7.0$  Hz, 3H);  $^{13}\text{C NMR}$  (100 MHz,  $\text{CDCl}_3$ )  $\delta$  163.5, 160.4, 159.5, 150.1, 148.5, 135.5, 128.7, 124.7, 115.4, 41.8, 30.2, 20.2, 14.6, 13.8; IR  $\nu_{\text{max}}$  ( $\text{cm}^{-1}$ )

3471, 3416, 1730, 1695; ESIMS  $m/z$  319  $[M+H]^+$ ; HRMS (ESI) for  $C_{16}H_{19}N_2O_3S$   $[M+H]^+$  calcd: 319.1116, found: 319.1108.

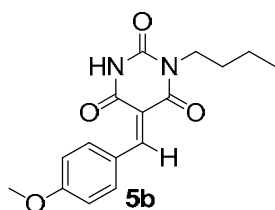

*E / Z* mixture

Yellow crystal, analytical TLC (silica gel 60) (25% ethyl acetate in *n*-hexane)  $R_f = 0.4$ ; 72% isolated yield; M.p. 166.4-167.1 °C;  $^1H$  NMR (400 MHz,  $CDCl_3$ )  $\delta$  8.53 (br s, 1H), 8.38 (d,  $J = 9.0$  Hz, 2H), 8.33 (br s, 1H), 6.99 (d,  $J = 9.0$  Hz, 2H), 3.96 (t,  $J = 7.5$  Hz, 2H), 3.92 (s, 3H), 1.63-1.66 (m, 2H), 1.37-1.42 (m, 2H), 0.96 (t,  $J = 7.5$  Hz, 3H);  $^{13}C$  NMR (100 MHz,  $CDCl_3$ )  $\delta$  164.9, 164.8, 163.9, 161.6, 160.9, 160.8, 160.0, 159.1, 150.4, 150.3, 138.7, 138.5, 125.7, 125.6, 114.34, 114.30, 114.14, 114.07, 55.9, 41.9, 41.3, 30.3, 20.4, 20.3, 15.0, 14.0; IR  $\nu_{max}$  ( $cm^{-1}$ ) 3464, 1741, 1689; ESIMS  $m/z$  303  $[M+H]^+$ ; HRMS (ESI) for  $C_{16}H_{19}N_2O_4$   $[M+H]^+$  calcd: 303.1345, found: 303.1357.

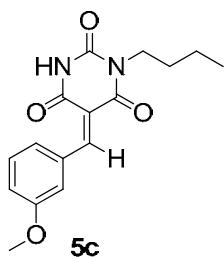

*E / Z* mixture

Yellow solid, analytical TLC (silica gel 60) (25% ethyl acetate in *n*-hexane)  $R_f = 0.4$ ; 78% isolated yield; M.p. 149.2-149.6 °C;  $^1H$  NMR (500 MHz,  $CDCl_3$ )  $\delta$  8.57 (s, 1H), 7.94 (br s, 1H), 7.60 (d,  $J = 7.5$  Hz, 1H), 7.38 (t,  $J = 8.0$  Hz, 1H), 7.11 (d,  $J = 7.5$  Hz, 1H), 3.96 (t,  $J = 7.5$  Hz, 2H), 3.87 (s, 3H), 1.62-1.68 (m, 2H), 1.36-1.42 (m, 2H), 0.96 (t,  $J = 7.0$  Hz, 3H);  $^{13}C$  NMR (100 MHz,  $CDCl_3$ )  $\delta$  163.4, 162.8, 160.9, 160.7, 160.3, 159.5, 150.5, 150.4, 133.8, 129.5, 128.1, 127.2, 120.9, 120.0, 118.2, 117.9, 117.6, 117.4, 55.70, 55.68, 42.0, 41.4, 30.3, 20.33, 20.31, 14.0; IR  $\nu_{max}$  ( $cm^{-1}$ ) 3419, 1737, 1698; ESIMS  $m/z$  303  $[M+H]^+$ ; HRMS (ESI) for  $C_{16}H_{19}N_2O_4$   $[M+H]^+$  calcd: 303.1345, found: 303.1359.

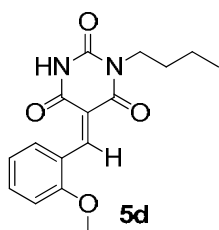

*E / Z* mixture

Yellow solid, analytical TLC (silica gel 60) (25% ethyl acetate in *n*-hexane)  $R_f = 0.4$ ; 25% isolated yield; M.p. 163.6-167.3 °C;  $^1\text{H}$  NMR (500 MHz,  $\text{CDCl}_3$ )  $\delta$  8.90 (s, 1H), 8.16 (br s, 1H), 8.06 (d,  $J = 8.0$  Hz, 1H), 7.51 (t,  $J = 8.5$  Hz, 1H), 7.02 (t,  $J = 7.5$  Hz, 1H), 6.94 (d,  $J = 8.5$  Hz, 1H), 3.88-3.91 (m, 5H), 1.59-1.63 (m, 2H), 1.34-1.40 (m, 2H), 0.93 (t,  $J = 7.0$  Hz, 3H);  $^{13}\text{C}$  NMR (100 MHz,  $\text{CDCl}_3$ )  $\delta$  162.3, 160.9, 160.0, 155.5, 150.3, 135.2, 133.0, 122.1, 120.1, 117.2, 110.7, 56.02, 56.01, 45.0, 41.4, 30.3, 20.4, 14.0; IR  $\nu_{\text{max}}$  ( $\text{cm}^{-1}$ ) 3449, 1698, 1668; ESIMS  $m/z$  303 [ $\text{M}+\text{H}^+$ ]; HRMS (ESI) for  $\text{C}_{16}\text{H}_{19}\text{N}_2\text{O}_4$  [ $\text{M}+\text{H}^+$ ] calcd: 303.1345, found: 303.1337.

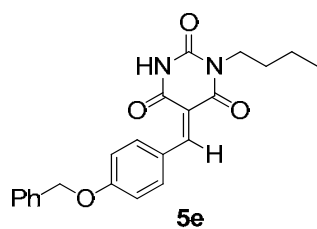

*E* / *Z* mixture

Yellow crystal, analytical TLC (silica gel 60) (50% ethyl acetate in *n*-hexane)  $R_f = 0.5$ ; 58% isolated yield; M.p. 168.8-170.4 °C;  $^1\text{H}$  NMR (500 MHz,  $\text{CDCl}_3$ )  $\delta$  8.53 (s, 1H), 8.36 (d,  $J = 8.5$  Hz, 2H), 7.97 (br s, 1H), 7.36-7.42 (m, 5H), 7.05 (d,  $J = 9.0$  Hz, 2H), 5.18 (s, 2H), 3.95 (t,  $J = 7.5$  Hz, 2H), 1.63-1.67 (m, 2H), 1.36-1.43 (m, 2H), 0.96 (t,  $J = 7.0$  Hz, 3H);  $^{13}\text{C}$  NMR (100 MHz,  $\text{CDCl}_3$ )  $\delta$  164.00, 163.96, 163.9, 163.2, 161.6, 161.0, 159.9, 159.1, 150.5, 150.4, 138.7, 138.6, 136.0, 129.97, 128.96, 128.6, 127.8, 127.7, 125.9, 125.8, 115.14, 115.12, 114.23, 114.18, 70.6, 45.0, 41.9, 41.4, 30.34, 30.33, 20.39, 20.35, 14.01, 13.99; IR  $\nu_{\text{max}}$  ( $\text{cm}^{-1}$ ) 3449, 1731, 1697, 1653; ESIMS  $m/z$  379 [ $\text{M}+\text{H}^+$ ]; HRMS (ESI) for  $\text{C}_{22}\text{H}_{23}\text{N}_2\text{O}_4$  [ $\text{M}+\text{H}^+$ ] calcd: 379.1658, found: 379.1667.

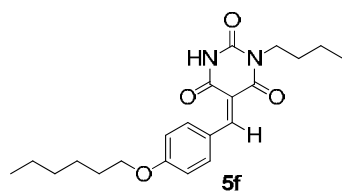

*E* / *Z* mixture

Yellow crystal, analytical TLC (silica gel 60) (25% ethyl acetate in *n*-hexane)  $R_f = 0.6$ ; 80% isolated yield; M.p. 149.8-152.2 °C;  $^1\text{H}$  NMR (500 MHz,  $\text{CDCl}_3$ )  $\delta$  8.53 (s, 1H), 8.38 (d,  $J = 8.0$  Hz, 2H), 6.97 (d,  $J = 8.5$  Hz, 2H), 4.07 (t,  $J = 6.0$  Hz, 2H), 3.96 (t,  $J = 7.5$  Hz, 2H), 1.79-1.84 (m, 2H), 1.61-1.67 (m, 2H), 1.46-1.48 (m, 2H), 1.34-1.41 (m, 6H), 0.97 (t,  $J = 7.5$  Hz, 3H), 0.90-0.93 (m, 3H);  $^{13}\text{C}$  NMR (100 MHz,  $\text{CDCl}_3$ )  $\delta$  164.6, 164.0, 160.0, 138.9, 125.5, 114.8, 113.8, 68.7, 41.87, 41.86, 41.85, 31.7, 30.3, 29.2, 25.8, 22.8, 20.3, 14.2, 14.0; IR  $\nu_{\text{max}}$  ( $\text{cm}^{-1}$ ) 3464, 1697, 1649; ESIMS  $m/z$  373 [ $\text{M}+\text{H}^+$ ]; HRMS (ESI) for  $\text{C}_{21}\text{H}_{29}\text{N}_2\text{O}_4$  [ $\text{M}+\text{H}^+$ ]

calcd: 373.2127, found: 373.2122.

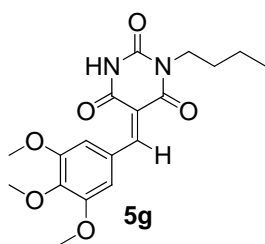

*E / Z* mixture

Yellow solid, analytical TLC (silica gel 60) (25% ethyl acetate in *n*-hexane)  $R_f = 0.6$ ; 42% isolated yield; M.p. 169.0-170.4 °C;  $^1\text{H}$  NMR (400 MHz,  $\text{CDCl}_3$ )  $\delta$  9.46-9.60 (br d, 1H), 8.49 (d,  $J = 9.0$  Hz, 1H), 7.82 (s, 1H), 7.74 (s, 1H), 3.94-4.01 (m, 11H), 1.62-1.67 (m, 2H), 1.37-1.42 (m, 2H), 0.94-0.99 (m, 3H);  $^{13}\text{C}$  NMR (100 MHz,  $\text{CDCl}_3$ )  $\delta$  163.8, 163.3, 161.30, 161.29, 160.33, 159.26, 152.59, 152.55, 150.3, 144.1, 144.0, 127.5, 127.4, 115.5, 115.4, 113.7, 113.5, 61.3, 56.6, 56.5, 42.0, 41.2, 30.30, 30.26, 20.3, 14.0; IR  $\nu_{\text{max}}$  ( $\text{cm}^{-1}$ ) 3422, 1736, 1697, 1655; ESIMS  $m/z$  363 [ $\text{M}+\text{H}^+$ ]; HRMS (ESI) for  $\text{C}_{18}\text{H}_{23}\text{N}_2\text{O}_6$  [ $\text{M}+\text{H}^+$ ] calcd: 363.1556, found: 363.1557.

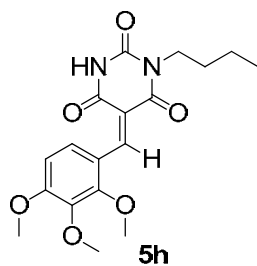

*E / Z* mixture

Yellow solid, analytical TLC (silica gel 60) (25% ethyl acetate in *n*-hexane)  $R_f = 0.4$ ; 69% isolated yield; M.p. 155.7-158.6 °C;  $^1\text{H}$  NMR (400 MHz,  $\text{CDCl}_3$ )  $\delta$  8.87 (s, 1H), 8.32-8.35 (m, 2H), 6.76 (d,  $J = 9.0$  Hz, 1H), 4.02 (s, 3H), 3.96 (s, 3H), 3.89-3.93 (m, 2H), 3.86 (s, 3H), 1.58-1.66 (m, 2H), 1.33-1.42 (m, 2H), 0.95 (t,  $J = 7.5$  Hz, 3H);  $^{13}\text{C}$  NMR (100 MHz,  $\text{CDCl}_3$ )  $\delta$  162.9, 161.3, 159.2, 156.3, 154.2, 150.4, 141.2, 130.0, 120.0, 115.0, 106.4, 62.2, 60.9, 56.2, 41.1, 30.1, 20.2, 13.8; IR  $\nu_{\text{max}}$  ( $\text{cm}^{-1}$ ) 3465, 1745, 1697, 1655; ESIMS  $m/z$  363 [ $\text{M}+\text{H}^+$ ]; HRMS (ESI) for  $\text{C}_{18}\text{H}_{20}\text{N}_4\text{O}_3\text{Na}$  [ $\text{M}+\text{Na}^+$ ] calcd: 363.1433, found: 363.1469.

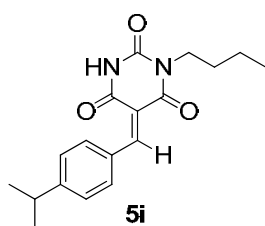

*E / Z* mixture

Yellow crystal, analytical TLC (silica gel 60) (25% ethyl acetate in *n*-hexane)  $R_f = 0.7$ ; 24%

isolated yield; M.p. 149.1-149.5 °C;  $^1\text{H}$  NMR (400 MHz,  $\text{CDCl}_3$ )  $\delta$  8.79 (br s, 1H), 8.60 (s, 1H), 8.20 (d,  $J = 8.5$  Hz, 2H), 7.36 (d,  $J = 8.0$  Hz, 2H), 3.98 (t,  $J = 7.5$  Hz, 2H), 2.97-3.04 (m, 1H), 1.63-1.71 (m, 2H), 1.41-1.46 (m, 2H), 1.30 (d,  $J = 7.5$  Hz, 6H), 0.99 (t,  $J = 7.5$  Hz, 3H);  $^{13}\text{C}$  NMR (100 MHz,  $\text{CDCl}_3$ )  $\delta$  163.4, 160.4, 160.2, 156.0, 150.1, 135.2, 130.2, 126.7, 116.0, 41.8, 34.5, 30.1, 23.5, 20.1, 13.8; IR  $\nu_{\text{max}}$  ( $\text{cm}^{-1}$ ) 3416, 1735, 1698, 1653; ESIMS  $m/z$  315  $[\text{M}+\text{H}^+]$ .

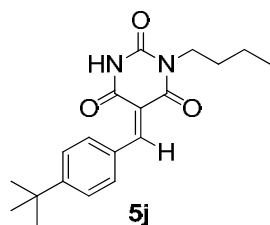

**5j**  $E / Z$  mixture

Yellow crystal, analytical TLC (silica gel 60) (25% ethyl acetate in  $n$ -hexane)  $R_f = 0.7$ ; 52% isolated yield; M.p. 156.3-160.6 °C;  $^1\text{H}$  NMR (400 MHz,  $\text{CDCl}_3$ )  $\delta$  9.60 (br d, 1H), 8.58 (s, 1H), 8.13-8.22 (m, 2H), 7.48-7.51 (m, 2H), 3.92-3.98 (m, 2H), 1.62-1.67 (m, 2H), 1.30-1.42 (m, 11H), 0.94-0.98 (m, 3H);  $^{13}\text{C}$  NMR (100 MHz,  $\text{CDCl}_3$ )  $\delta$  163.6, 163.2, 161.2, 160.8, 160.3, 159.6, 158.3, 158.1, 150.7, 150.5, 135.1, 134.9, 130.0, 129.9, 125.7, 125.7, 116.3, 41.9, 41.3, 35.6, 31.2, 30.3, 20.3, 20.3, 13.97, 13.96; IR  $\nu_{\text{max}}$  ( $\text{cm}^{-1}$ ) 3464, 1730, 1698, 1653; ESIMS  $m/z$  329  $[\text{M}+\text{H}^+]$ , HRMS (ESI) for  $\text{C}_{19}\text{H}_{25}\text{N}_2\text{O}_3$   $[\text{M}+\text{H}]^+$  calcd: 329.1865, found: 329.1869.

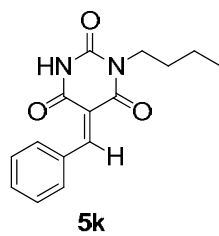

**5k**

$E / Z$  mixture

Transparent crystal, analytical TLC (silica gel 60) (50% ethyl acetate in  $n$ -hexane)  $R_f = 0.6$ ; 40% isolated yield; M.p. 155.5-156.5 °C;  $^1\text{H}$  NMR (500 MHz,  $\text{CDCl}_3$ )  $\delta$  8.60 (s, 1H), 8.13 (d,  $J = 8.0$  Hz, 2H), 7.46-7.56 (m, 3H), 3.96 (t,  $J = 7.5$  Hz, 2H), 1.62-1.68 (m, 2H), 1.36-1.44 (m, 2H), 0.97 (t,  $J = 7.5$  Hz, 3H);  $^{13}\text{C}$  NMR (100 MHz,  $\text{CDCl}_3$ )  $\delta$  163.2, 160.5, 160.0, 159.8, 150.1, 134.3, 134.0, 133.7, 133.5, 132.6, 128.6, 128.6, 117.4, 45.01, 45.00, 42.1, 30.3, 20.4, 20.3, 14.0; IR  $\nu_{\text{max}}$  ( $\text{cm}^{-1}$ ) 3436, 1731, 1701, 1655; ESIMS  $m/z$  273  $[\text{M}+\text{H}^+]$ .

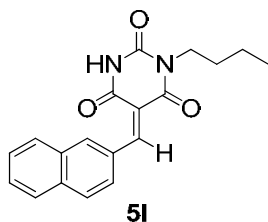

**5l**

*E / Z* mixture

Yellow crystal, analytical TLC (silica gel 60) (25% ethyl acetate in *n*-hexane)  $R_f = 0.6$ ; 85% isolated yield; M.p. 199.0-202.4 °C;  $^1\text{H NMR}$  (400 MHz,  $\text{CDCl}_3$ )  $\delta$  9.25 (s, 1H), 8.25 (br s, 1H), 8.01 (d,  $J = 8.5$  Hz, 2H), 7.88-7.93 (m, 2H), 7.54-7.58 (m, 3H), 3.84-3.88 (m, 2H), 1.54-1.62 (m, 2H), 1.30-1.36 (m, 2H), 0.90 (t,  $J = 7.2$  Hz, 3H);  $^{13}\text{C NMR}$  (100 MHz,  $\text{CDCl}_3$ )  $\delta$  162.8, 161.4, 160.4, 159.3, 158.4, 157.8, 149.8, 133.4, 133.1, 132.9, 132.0, 131.8, 130.4, 130.1, 130.0, 129.9, 127.73, 127.69, 126.7, 125.0, 124.9, 124.23, 124.16, 119.4, 119.3, 45.0, 42.0, 41.5, 30.3, 30.2, 20.4, 20.3, 13.94, 13.89; IR  $\nu_{\text{max}}$  ( $\text{cm}^{-1}$ ) 3415, 1737, 1699, 1666; ESIMS  $m/z$  323[ $\text{M}+\text{H}^+$ ]; HRMS (ESI) for  $\text{C}_{14}\text{H}_{18}\text{N}_4\text{O}_5\text{Na}$  [ $\text{M}+\text{Na}$ ] $^+$  calcd: 345.1175, found: 345.1162.

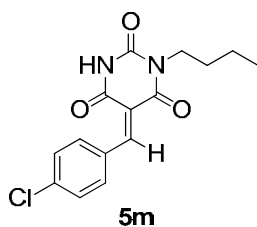

**5m**

*E / Z* mixture

Transparent crystal, analytical TLC (silica gel 60) (25% ethyl acetate in *n*-hexane)  $R_f = 0.6$ ; 80% isolated yield; M.p. 187.4-194.0 °C;  $^1\text{H NMR}$  (500 MHz,  $\text{CDCl}_3$ )  $\delta$  8.52 (s, 1H), 8.24 (br s, 1H), 8.10 (d,  $J = 8.5$  Hz, 2H), 7.45 (d,  $J = 8.5$  Hz, 2H), 3.96 (t,  $J = 7.5$  Hz, 2H), 1.63-1.68 (m, 2H), 1.36-1.43 (m, 2H), 0.97 (t,  $J = 7.0$  Hz, 3H);  $^{13}\text{C NMR}$  (100 MHz,  $\text{CDCl}_3$ )  $\delta$  163.0, 160.9, 160.1, 158.7, 150.0, 140.1, 135.7, 135.5, 131.0, 129.99, 128.96, 117.6, 45.0, 42.10 30.3, 20.3, 14.0; IR  $\nu_{\text{max}}$  ( $\text{cm}^{-1}$ ) 3416, 1730, 1697, 1655; ESIMS  $m/z$  307 [ $\text{M}+\text{H}^+$ ]; HRMS (ESI) for  $\text{C}_{15}\text{H}_{16}\text{N}_2\text{O}_3\text{Cl}$  [ $\text{M}+\text{H}$ ] $^+$  calcd: 307.0849, found: 307.0861.

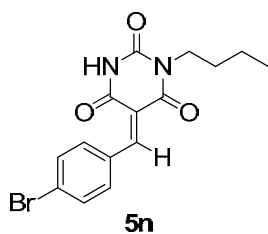

**5n**

*E / Z* mixture

Yellow crystal, analytical TLC (silica gel 60) (25% ethyl acetate in *n*-hexane)  $R_f = 0.6$ ; 32% isolated yield; M.p. 188.1-188.6 °C;  $^1\text{H NMR}$  (500 MHz,  $\text{CDCl}_3$ )  $\delta$  8.50 (s, 1H), 8.26 (br s, 1H), 8.00 (d,  $J = 8.5$  Hz, 2H), 7.61 (d,  $J = 8.5$  Hz, 2H), 3.96 (t,  $J = 7.5$  Hz, 2H), 1.63-1.68 (m, 2H), 1.36-1.43 (m, 2H), 0.97 (t,  $J = 7.5$  Hz, 3H);  $^{13}\text{C NMR}$  (100 MHz,  $\text{CDCl}_3$ )  $\delta$  163.0, 160.9,



160.2, 158.8, 158.1, 150.2, 135.6, 135.4, 132.0, 131.9, 131.38, 131.36, 128.9, 128.7, 117.81, 117.78, 45.0, 42.1, 41.5, 30.3, 20.34, 20.31, 14.0; IR  $\nu_{\max}$  (cm<sup>-1</sup>) 3449, 1728, 1697, 1659; ESIMS  $m/z$  351 [M+H<sup>+</sup>]; HRMS (ESI) for C<sub>15</sub>H<sub>16</sub>N<sub>2</sub>O<sub>3</sub>Br [M+H]<sup>+</sup> calcd: 351.0344, found: 351.0337.

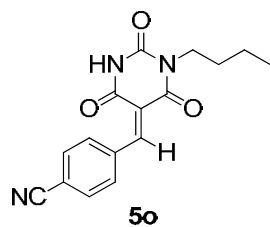

*E* / *Z* mixture

Yellow solid, analytical TLC (silica gel 60) (25% ethyl acetate in *n*-hexane)  $R_f$  = 0.5; 85% isolated yield; M.p. 223.5-225.1 °C; <sup>1</sup>H NMR (500 MHz, CDCl<sub>3</sub>)  $\delta$  8.54 (s, 1H), 8.01 (d,  $J$  = 8.0 Hz, 2H), 7.73 (d,  $J$  = 8.5 Hz, 2H), 3.97 (t,  $J$  = 7.5 Hz, 2H), 1.60-1.68 (m, 2H), 1.34-1.44 (m, 2H), 0.97 (t,  $J$  = 7.5 Hz, 3H); <sup>13</sup>C NMR (100 MHz, CDCl<sub>3</sub>)  $\delta$  162.2, 161.0, 160.3, 159.3, 157.0, 156.3, 149.6, 149.5, 136.9, 136.8, 132.9, 132.6, 132.99, 131.97, 120.2, 118.3, 115.5, 115.4, 45.0, 42.2, 30.23, 30.20, 20.31, 20.29, 13.93, 13.92; IR  $\nu_{\max}$  (cm<sup>-1</sup>) 3417, 2235, 1727, 1698, 1655; ESIMS  $m/z$  298 [M+H<sup>+</sup>]; HRMS (ESI) for C<sub>16</sub>H<sub>16</sub>N<sub>3</sub>O<sub>3</sub> [M+H]<sup>+</sup> calcd: 298.1192, found: 298.1198.

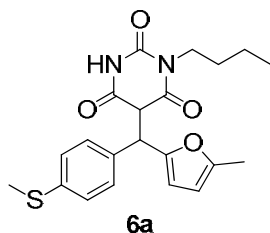

Yellow oil, analytical TLC (silica gel 60) (30% ethyl acetate in *n*-hexane)  $R_f$  = 0.6; 55% isolated yield; <sup>1</sup>H NMR (400 MHz, CDCl<sub>3</sub>)  $\delta$  8.39 (br s, 1H), 7.18-7.28 (m, 4H), 5.96-5.99 (m, 1H), 5.91-5.92 (m, 1H), 5.00 (d,  $J$  = 4.0 Hz, 1H), 4.15-4.18 (m, 1H), 3.68-3.80 (m, 2H), 2.48 (s, 3H), 2.28 (s, 3H), 1.42-1.46 (m, 2H), 1.25-1.30 (m, 2H), 0.89-0.949 (m, 3H); <sup>13</sup>C NMR (100 MHz, CDCl<sub>3</sub>)  $\delta$  167.7, 167.6, 167.1, 166.9, 152.1, 152.0, 150.4, 150.4, 150.1, 138.9, 133.6, 133.5, 129.6, 126.6, 126.6, 109.9, 109.8, 106.7, 53.5, 53.4, 47.8, 41.50, 41.47, 31.8, 30.01, 29.97, 22.9, 20.2, 20.1, 15.8, 14.3, 13.9, 13.8, 13.7; IR  $\nu_{\max}$  (cm<sup>-1</sup>) 3461, 1717, 1684; ESIMS  $m/z$  401[M+H<sup>+</sup>].

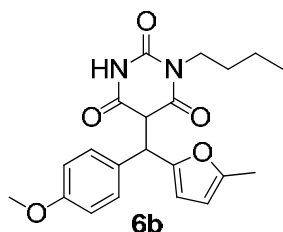

Yellow oil, analytical TLC (silica gel 60) (30% ethyl acetate in *n*-hexane)  $R_f = 0.6$ ; 52% isolated yield;  $^1\text{H NMR}$  (400 MHz,  $\text{CDCl}_3$ )  $\delta$  8.35 (br s, 1H), 7.23-7.26 (m, 2H), 6.82-6.85 (m, 2H), 5.95 (d,  $J = 9.0$  Hz, 1H), 5.89-5.90 (m, 1H), 4.97 (d,  $J = 4.0$  Hz, 1H), 4.16 (dd,  $J = 4.0, 7.0$  Hz, 1H), 3.79 (s, 3H), 3.64-3.75 (m, 2H), 2.27 (s, 3H), 1.35-1.48 (m, 2H), 1.17-1.29 (m, 2H), 0.86-0.92 (m, 3H);  $^{13}\text{C NMR}$  (100 MHz,  $\text{CDCl}_3$ )  $\delta$  167.9, 167.6, 167.3, 166.9, 159.6, 151.93, 151.91, 150.9, 150.8, 150.1, 130.3, 128.5, 114.2, 114.2, 109.8, 109.7, 106.67, 106.65, 55.4, 53.7, 53.7, 47.9, 47.8, 41.5, 41.4, 30.01, 29.96, 20.2, 20.1, 13.9, 13.8, 13.7; IR  $\nu_{\text{max}}$  ( $\text{cm}^{-1}$ ) 3436, 1719, 1690; ESIMS  $m/z$  385 [ $\text{M}+\text{H}^+$ ].

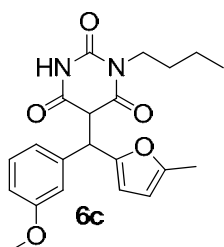

Yellow oil, analytical TLC (silica gel 60) (50% ethyl acetate in *n*-hexane)  $R_f = 0.4$ ; 78% isolated yield;  $^1\text{H NMR}$  (400 MHz,  $\text{CDCl}_3$ )  $\delta$  8.70 (br s, 1H), 7.19-7.26 (m, 1H), 6.82-6.91 (m, 3H), 6.00 (dd,  $J = 3.5, 15.5$  Hz, 1H), 5.89 (dd,  $J = 3.0, 7.5$  Hz, 1H), 4.98 (m, 1H), 4.17 (dd,  $J = 4.5, 10.5$  Hz, 1H), 3.63-3.76 (m, 5H), 2.26 (s, 3H), 1.37-1.44 (m, 2H), 1.20-1.27 (m, 2H), 0.86-0.91 (m, 3H);  $^{13}\text{C NMR}$  (100 MHz,  $\text{CDCl}_3$ )  $\delta$  167.84, 167.83, 167.66, 167.57, 152.1, 152.0, 150.50, 150.45, 150.4, 150.3, 136.8, 136.7, 129.1, 128.9, 128.8, 128.42, 128.39, 110.0, 109.9, 106.7, 53.6, 53.5, 48.41, 48.39, 48.38, 41.48, 41.45, 29.99, 29.95, 20.2, 20.1, 13.9, 13.81, 13.75; IR  $\nu_{\text{max}}$  ( $\text{cm}^{-1}$ ) 3421, 1718, 1686; ESIMS  $m/z$  385 [ $\text{M}+\text{H}^+$ ].

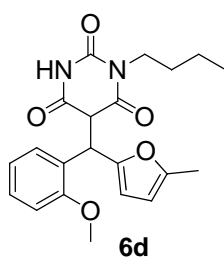

Yellow oil, analytical TLC (silica gel 60) (50% ethyl acetate in *n*-hexane)  $R_f = 0.4$ ; 25% isolated yield;  $^1\text{H NMR}$  (500 MHz,  $\text{CDCl}_3$ )  $\delta$  8.32 (br d, 1H), 7.24-7.29 (m, 1H), 7.08 (dd,  $J =$

7.5, 19.0 Hz, 1H), 6.87-6.92 (m, 2H), 6.07 (dd,  $J = 2.5, 34.5$  Hz, 1H), 5.91 (br s, 1H), 5.38, (t,  $J = 5.0$  Hz, 1H), 4.26 (dd,  $J = 4.5, 16.5$  Hz, 1H), 3.88 (d,  $J = 4.5$  Hz, 3H), 3.77 (t,  $J = 9.5$  Hz, 1H), 3.60-3.75 (m, 1H), 2.24 (s, 3H), 1.50-1.54 (m, 1H), 1.17-1.32 (m, 4H), 0.85-0.92 (m, 3H);  $^{13}\text{C}$  NMR (100 MHz,  $\text{CDCl}_3$ )  $\delta$  168.4, 167.9, 167.6, 167.3, 156.40, 156.37, 152.22, 152.17, 150.73, 150.66, 150.5, 150.3, 130.29, 130.27, 129.1, 129.0, 126.9, 126.7, 120.67, 120.65, 110.3, 110.2, 110.0, 106.8, 106.7, 60.7, 55.64, 55.62, 55.52, 55.51, 51.6, 51.4, 45.0, 42.1, 41.7, 41.4, 41.3, 30.1, 30.0, 21.3, 20.3, 20.1, 14.4, 14.0, 13.9, 13.8, 13.7; IR  $\nu_{\text{max}}$  ( $\text{cm}^{-1}$ ) 3434, 1720, 1687; ESIMS  $m/z$  385 [ $\text{M}+\text{H}^+$ ].

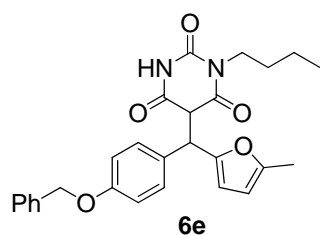

Yellow oil, analytical TLC (silica gel 60) (50% ethyl acetate in *n*-hexane)  $R_f = 0.3$ ; 30% isolated yield;  $^1\text{H}$  NMR (500 MHz,  $\text{CDCl}_3$ )  $\delta$  8.12 (br s, 1H), 7.32-7.42 (m, 5H), 7.24 (t,  $J = 9.5$  Hz, 2H), 6.89-6.92 (m, 2H), 5.95 (dd,  $J = 2.5, 10.0$  Hz, 1H), 5.89-5.90 (m, 1H), 5.03 (s, 2H), 4.96 (d,  $J = 3.5$  Hz, 1H), 4.14 (dd,  $J = 5.0, 9.0$  Hz, 1H), 3.67-3.75 (m, 2H), 2.26 (s, 3H), 1.18-1.45 (m, 4H), 0.87-0.91 (m, 3H);  $^{13}\text{C}$  NMR (100 MHz,  $\text{CDCl}_3$ )  $\delta$  167.9, 167.6, 167.3, 166.9, 158.9, 152.0, 152.0, 150.83, 150.81, 150.10, 150.08, 137.0, 130.3, 128.9, 128.84, 128.83, 128.3., 127.74, 127.73, 115.12, 115.09, 109.8, 109.7, 106.7, 70.2, 53.72, 53.69, 47.91, 47.85, 45.01, 45.00, 41.50, 41.48, 41.47, 30.03, 29.97, 20.22, 20.16, 13.94, 13.93, 13.83, 13.78; IR  $\nu_{\text{max}}$  ( $\text{cm}^{-1}$ ) 3448, 1719, 1686; ESIMS  $m/z$  461 [ $\text{M}+\text{H}^+$ ]; HRMS (ESI) for  $\text{C}_{27}\text{H}_{28}\text{N}_2\text{O}_5\text{Na}$  [ $\text{M}+\text{Na}]^+$  calcd: 483.1896, found: 483.1881.

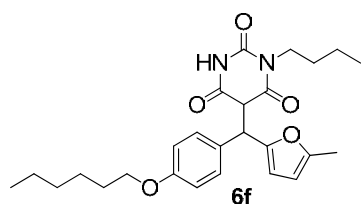

Yellow oil, analytical TLC (silica gel 60) (10% ethyl acetate in *n*-hexane)  $R_f = 0.6$ ; 16% isolated yield;  $^1\text{H}$  NMR (400 MHz,  $\text{CDCl}_3$ )  $\delta$  8.21 (br s, 1H), 7.23 (t,  $J = 8.5$  Hz 2H), 6.82-6.86 (m, 2H), 5.90-5.99 (m, 2H), 4.97 (d,  $J = 3.5$  Hz, 1H), 4.18 (dd,  $J = 3.5, 7.0$  Hz, 1H), 3.94 (t,  $J = 6.5$  Hz, 2H), 3.65-3.79 (m, 2H), 2.29 (s, 3H), 1.75-1.82 (m, 2H), 1.19-1.49 (m, 10H), 0.89-0.94 (m, 6H);  $^{13}\text{C}$  NMR (100 MHz,  $\text{CDCl}_3$ )  $\delta$  167.9, 167.6, 167.3, 166.8, 159.2, 151.89, 151.86, 151.82, 150.94, 150.88, 150.00, 149.96, 149.92, 130.2, 130.05, 129.99,

129.97, 128.2, 114.8, 114.7, 114.6, 109.72, 109.66, 109.57, 106.6, 68.2, 53.74, 53.70, 48.98, 47.88, 47.85, 41.46, 41.42, 41.38, 31.8, 30.0, 30.0, 29.9, 25.9, 22.8, 20.2, 20.1, 14.2, 13.86, 13.80, 13.76, 13.72, 13.66; IR  $\nu_{\max}$  (cm<sup>-1</sup>) 3416, 1719, 1686; ESIMS  $m/z$  455 [M+H<sup>+</sup>].

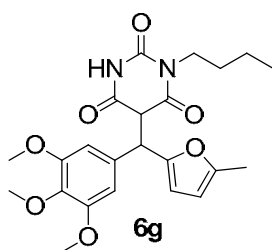

Yellow oil, analytical TLC (silica gel 60) (50% ethyl acetate in *n*-hexane)  $R_f$  = 0.4; 65% isolated yield; <sup>1</sup>H NMR (400 MHz, CDCl<sub>3</sub>)  $\delta$  8.28-8.3 (br d, 1H), 6.60 (d,  $J$  = 3.5 Hz, 2H), 5.98-6.02 (m, 1H), 5.90-2.92 (m, 1H), 4.96 (d,  $J$  = 7.0 Hz, 1H), 4.19 (d,  $J$  = 3.5 Hz, 1H), 3.83 (s, 3H), 3.81 (s, 6H), 3.62-3.77 (m, 2H), 2.27 (s, 3H), 1.34-1.50 (m, 2H), 1.18-1.32 (m, 2H), 0.87-0.92 (m, 3H); <sup>13</sup>C NMR (100 MHz, CDCl<sub>3</sub>)  $\delta$  167.8, 167.7, 167.1, 166.8, 153.38, 153.35, 152.0, 151.9, 150.69, 150.66, 150.0, 149.9, 138.2, 138.1, 132.4, 132.1, 109.83, 109.75, 106.8, 106.7, 106.6, 106.5, 61.0, 56.37, 56.35, 53.5, 48.6, 48.3, 41.5, 41.4, 30.1, 20.2, 20.1, 13.84, 13.76, 13.7; IR  $\nu_{\max}$  (cm<sup>-1</sup>) 3424, 1719, 1686; ESIMS  $m/z$  445 [M+H<sup>+</sup>].

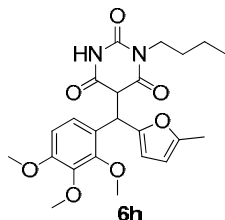

Yellow oil, analytical TLC (silica gel 60) (30% ethyl acetate in *n*-hexane)  $R_f$  = 0.5; 47% isolated yield; <sup>1</sup>H NMR (400 MHz, CDCl<sub>3</sub>)  $\delta$  8.66-8.70 (br d, 1H), 6.81-6.91 (m, 1H), 6.57-6.62 (m, 1H), 6.04 (d,  $J$  = 25.6 Hz, 1H), 5.89 (br s, 1H), 5.29 (br s, 1H), 4.13-4.16 (m, 1H), 3.95 (s, 3H), 3.82-3.83 (m, 6H), 3.61-3.78 (m, 2H), 2.24 (s, 3H), 1.52-1.54 (m, 1H), 1.20-1.37 (m, 3H), 0.86-0.92 (m, 3H); <sup>13</sup>C NMR (100 MHz, CDCl<sub>3</sub>)  $\delta$  168.2, 167.8, 167.7, 167.5, 153.51, 153.50, 152.00, 151.97, 151.4, 150.9, 150.73, 150.68, 150.6, 141.9, 124.5, 124.4, 123.9, 123.7, 109.7, 107.0, 107.0, 106.7, 106.6, 61.3, 61.2, 60.9, 56.1, 56.0, 52.70, 52.66, 41.9, 41.5, 41.4, 41.3, 30.1, 30.0, 20.2, 20.1, 13.89, 13.87, 13.8, 13.7; IR  $\nu_{\max}$  (cm<sup>-1</sup>) 3421, 1719, 1686; ESIMS  $m/z$  445 [M+H<sup>+</sup>]; HRMS (ESI) for C<sub>23</sub>H<sub>28</sub>N<sub>2</sub>O<sub>7</sub>Na [M+Na]<sup>+</sup> calcd: 467.1794, found: 467.1780.

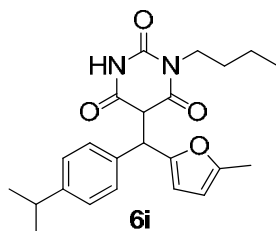

Yellow oil, analytical TLC (silica gel 60) (30% ethyl acetate in *n*-hexane)  $R_f = 0.6$ ; 66% isolated yield;  $^1\text{H NMR}$  (400 MHz,  $\text{CDCl}_3$ )  $\delta$  8.37 (br s, 1H), 7.15-7.26 (m, 4H), 5.98 (dd,  $J = 3.0, 10.5$  Hz, 1H), 5.89-5.90 (m, 1H), 4.98 (br s, 1H), 4.17 (dd,  $J = 3.5, 7.0$  Hz, 1H), 3.61-3.76 (m, 2H), 2.83-2.93 (m, 1H), 2.26 (s, 3H), 1.30-1.46 (m, 2H), 1.15-1.23 (m, 8H), 0.86-0.92 (m, 3H);  $^{13}\text{C NMR}$  (100 MHz,  $\text{CDCl}_3$ )  $\delta$  167.8, 167.7, 167.3, 166.9, 152.0, 151.9, 150.72, 150.67, 150.1, 149.1, 149.0, 133.94, 133.93, 133.8, 129.0, 129.0, 126.9, 126.8, 109.9, 109.8, 106.68, 106.65, 53.64, 53.61, 48.3, 48.2, 41.5, 41.4, 33.9, 29.9, 24.11, 24.08, 24.0, 20.2, 20.1, 13.9, 13.8, 13.7; IR  $\nu_{\text{max}}$  ( $\text{cm}^{-1}$ ) 3449, 1719, 1686; ESIMS  $m/z$  397  $[\text{M}+\text{H}^+]$ .

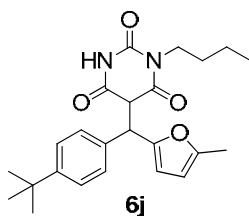

Brown oil, analytical TLC (silica gel 60) (25% ethyl acetate in *n*-hexane)  $R_f = 0.5$ ; 73% isolated yield;  $^1\text{H NMR}$  (400 MHz,  $\text{CDCl}_3$ )  $\delta$  8.47 (br d, 1H), 7.22-7.34 (m, 4H), 5.98 (dd,  $J = 3.0, 13.0$  Hz, 1H), 5.88-5.90 (m, 1H), 4.98-5.00 (m, 1H), 4.16 (dd,  $J = 3.5, 7.0$  Hz, 1H), 3.61-3.76 (m, 2H), 2.26 (s, 3H), 1.34-1.44 (m, 2H), 1.33 (s, 9H), 1.14-1.29 (m, 2H), 0.86-0.92 (m, 3H);  $^{13}\text{C NMR}$  (100 MHz,  $\text{CDCl}_3$ )  $\delta$  167.9, 167.7, 167.5, 167.2, 151.94, 151.88, 151.33, 151.28, 150.73, 150.66, 150.2, 133.6, 133.5, 128.8, 128.7, 125.73, 125.69, 109.9, 109.8, 106.68, 106.65, 53.62, 53.59, 48.2, 48.0, 41.44, 41.36, 34.7, 31.5, 30.0, 20.2, 20.1, 13.9, 13.8, 13.7; IR  $\nu_{\text{max}}$  ( $\text{cm}^{-1}$ ) 3414, 1719, 1686; ESIMS  $m/z$  410  $[\text{M}+\text{H}^+]$ ; HRMS (ESI) for  $\text{C}_{24}\text{H}_{30}\text{N}_2\text{O}_4\text{Na}$   $[\text{M}+\text{Na}]^+$  calcd: 433.2103, found: 433.2096.

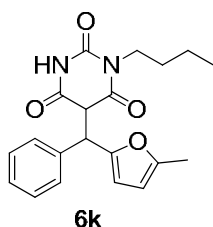

Yellow oil, analytical TLC (silica gel 60) (50% ethyl acetate in *n*-hexane)  $R_f = 0.5$ ; 79% isolated yield;  $^1\text{H NMR}$  (400 MHz,  $\text{CDCl}_3$ )  $\delta$  8.52 (br s, 1H), 7.31 (m, 5H), 5.98 (dd,  $J = 3.5, 15.5$  Hz, 1H), 5.89-5.91 (m, 1H), 5.01 (d,  $J = 4.5$  Hz, 1H), 4.17 (dd,  $J = 4.5, 10.5$  Hz, 1H),

3.63-3.76 (m, 2H), 2.26 (s, 3H), 1.27-1.45 (m, 2H), 1.15-1.20 (m, 2H), 0.86-0.90 (m, 3H);  $^{13}\text{C}$  NMR (100 MHz,  $\text{CDCl}_3$ )  $\delta$  167.8, 167.6, 167.3, 167.3, 159.84, 159.83, 152.1, 152.0, 150.41, 150.35, 138.22, 138.20, 129.84, 129.81, 121.4, 121.3, 115.2, 115.1, 113.64, 113.57, 110.0, 109.9, 106.73, 106.72, 55.4, 53.5, 53.4, 48.4, 48.3, 41.5, 41.4, 30.01, 29.98, 20.2, 20.1, 13.9, 13.8, 13.7; IR  $\nu_{\text{max}}$  ( $\text{cm}^{-1}$ ) 3414, 1719, 1685; ESIMS  $m/z$  355  $[\text{M}+\text{H}^+]$ .

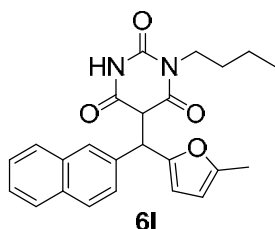

Yellow oil, analytical TLC (silica gel 60) (25% ethyl acetate in *n*-hexane)  $R_f = 0.4$ ; 35% isolated yield;  $^1\text{H}$  NMR (400 MHz,  $\text{CDCl}_3$ )  $\delta$  8.10-8.24 (m, 1H), 7.82-7.91 (m, 2H), 7.41-7.61 (m, 4H), 6.01 (dd,  $J = 3.0, 11.0$  Hz, 1H), 5.92-5.94 (m, 2H), 4.17 (dd,  $J = 3.5, 15.0$  Hz, 1H), 3.72-3.87 (m, 1H), 3.66 (t,  $J = 7.5$  Hz, 1H), 2.27 (s, 3H), 1.44-1.51 (m, 1H), 1.13-1.31 (m, 3H), 0.80-0.94 (m, 3H);  $^{13}\text{C}$  NMR (100 MHz,  $\text{CDCl}_3$ )  $\delta$  168.8, 167.8, 167.2, 166.6, 152.23, 152.17, 150.3, 150.2, 150.1, 134.12, 134.10, 133.7, 133.6, 130.92, 130.85, 129.62, 129.58, 128.9, 127.8, 127.7, 127.2, 127.1, 125.94, 125.92, 125.4, 122.3, 122.2, 110.24, 110.18, 107.0, 52.4, 52.3, 43.9, 43.2, 41.6, 41.4, 30.0, 29.9, 20.2, 20.1, 13.9, 13.83, 13.80, 13.7; IR  $\nu_{\text{max}}$  ( $\text{cm}^{-1}$ ) 3448, 1716, 1686; ESIMS  $m/z$  404  $[\text{M}+\text{H}^+]$ ; HRMS (ESI) for  $\text{C}_{24}\text{H}_{24}\text{N}_2\text{O}_4\text{Na}$   $[\text{M}+\text{Na}]^+$  calcd: 427.1634, found: 427.1674.

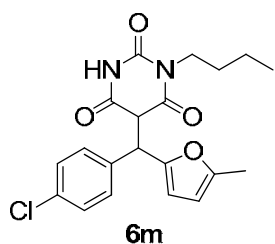

Yellow oil, analytical TLC (silica gel 60) (50% ethyl acetate in *n*-hexane)  $R_f = 0.5$ ; 95% isolated yield;  $^1\text{H}$  NMR (400 MHz,  $\text{CDCl}_3$ )  $\delta$  8.68 (br d, 1H), 7.28 (d,  $J = 7.0$  Hz, 4H), 5.95 (dd,  $J = 3.5, 13.0$  Hz, 1H), 5.89-5.91 (m, 1H), 5.02-5.03 (m, 1H), 4.11 (dd,  $J = 4.5, 8.0$  Hz, 1H), 3.66-3.77 (m, 2H), 2.25 (s, 3H), 1.38-1.45 (m, 2H), 1.19-1.27 (m, 2H), 0.88-0.92 (m, 3H);  $^{13}\text{C}$  NMR (100 MHz,  $\text{CDCl}_3$ )  $\delta$  167.6, 167.5, 167.3, 167.2, 152.3, 152.2, 150.3, 150.0, 150.0, 135.9, 135.7, 134.2, 134.2, 130.3, 130.6, 129.0, 129.0, 110.0, 109.9, 106.8, 53.3, 47.3, 47.24, 47.23, 45.0, 41.5, 30.03, 29.98, 20.2, 20.1, 13.9, 13.8, 13.70; IR  $\nu_{\text{max}}$  ( $\text{cm}^{-1}$ ) 3448, 1717, 1686; ESIMS  $m/z$  389  $[\text{M}+\text{H}^+]$ ; HRMS (ESI) for  $\text{C}_{20}\text{H}_{21}\text{N}_2\text{O}_4\text{ClNa}$   $[\text{M}+\text{Na}]^+$  calcd: 411.1088,

found: 411.1105.

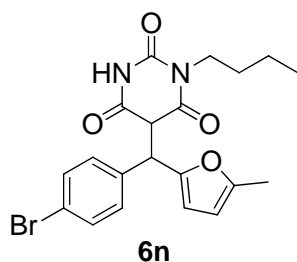

Yellow oil, analytical TLC (silica gel 60) (50% ethyl acetate in *n*-hexane)  $R_f = 0.5$ ; 95% isolated yield;  $^1\text{H NMR}$  (400 MHz,  $\text{CDCl}_3$ )  $\delta$  8.60 (br d, 1H), 7.43-7.46 (m, 2H), 7.20-7.24 (m, 2H), 5.95 (dd,  $J = 3.5, 13.0$  Hz, 1H), 5.90-5.93 (m, 1H), 5.01-5.02 (m, 1H), 4.11 (dd,  $J = 4.5, 7.0$  Hz, 1H), 3.70-3.76 (m, 2H), 2.25 (s, 3H), 1.39-1.45 (m, 2H), 1.20-1.25 (m, 2H), 0.88-0.92 (m, 3H);  $^{13}\text{C NMR}$  (100 MHz,  $\text{CDCl}_3$ )  $\delta$  167.54, 167.47, 167.46, 167.08, 167.05, 167.00, 169.99, 152.3, 152.24, 150.18, 150.15, 150.13, 149.9, 149.8, 136.4, 136.3, 132.08, 132.05, 132.02, 131.98, 131.96, 130.99, 130.95, 130.90, 130.88, 122.39, 122.38, 110.1, 110.0, 106.86, 106.84, 106.81, 105.0, 53.2, 47.34, 47.28, 45.0, 41.6, 30.04, 29.98, 20.17, 20.15, 13.9, 13.8, 13.7; IR  $\nu_{\text{max}}$  ( $\text{cm}^{-1}$ ) 3447, 1717, 1685; ESIMS  $m/z$  433  $[\text{M}+\text{H}^+]$ ; HRMS (ESI) for  $\text{C}_{20}\text{H}_{21}\text{N}_2\text{O}_4\text{BrNa}$   $[\text{M}+\text{Na}]^+$  calcd: 455.0582, found: 455.0575.

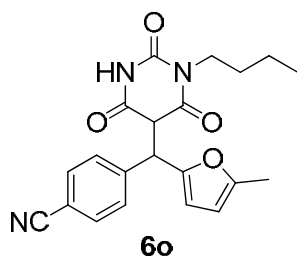

Yellow oil, analytical TLC (silica gel 60) (50% ethyl acetate in *n*-hexane)  $R_f = 0.4$ ; 98% isolated yield;  $^1\text{H NMR}$  (500 MHz,  $\text{CDCl}_3$ )  $\delta$  8.61 (br d, 1H), 7.62 (t,  $J = 8.0$  Hz, 2H), 7.49 (t,  $J = 8.0$  Hz, 2H), 5.99 (dd,  $J = 2.5, 11.0$  Hz, 1H), 5.92 (br s, 1H), 5.15 (br s, 1H), 4.07 (t,  $J = 3.5$  Hz, 1H), 3.71-3.80 (m, 2H), 2.24 (s, 3H), 1.41-1.48 (m, 2H), 1.24-1.27 (m, 2H), 0.89-0.92 (m, 3H);  $^{13}\text{C NMR}$  (100 MHz,  $\text{CDCl}_3$ )  $\delta$  167.5, 167.04, 166.96, 166.6, 152.7, 150.1, 150.0, 148.81, 148.79, 143.6, 143.4, 132.50, 132.49, 130.1, 130.0, 129.9, 118.7, 111.97, 111.95, 110.5, 110.4, 106.97, 106.96, 106.94, 61.0, 53.07, 53.05, 53.03, 53.01, 47.24, 47.21, 47.0, 46.9, 41.7, 30.03, 29.97, 21.3, 20.2, 20.1, 14.4, 13.9, 13.74, 13.65; IR  $\nu_{\text{max}}$  ( $\text{cm}^{-1}$ ) 3448, 2230, 1718, 1686; ESIMS  $m/z$  380  $[\text{M}+\text{H}^+]$ .

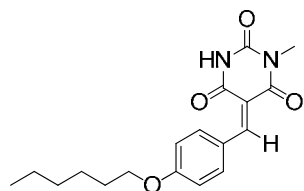

**7a** *E / Z* mixture

Yellow crystal, analytical TLC (silica gel 60) (25% ethyl acetate in *n*-hexane)  $R_f = 0.5$ ; 95% isolated yield;  $^1\text{H}$  NMR (500 MHz,  $\text{CDCl}_3$ )  $\delta$  8.61-8.64 (br s, 1H), 8.53 (s, 1H), 8.39 (d,  $J = 8.5$  Hz, 2H), 6.97 (d,  $J = 8.5$  Hz, 2H), 4.07 (t,  $J = 6.5$  Hz, 2H), 3.39 (s, 3H), 1.79-1.84 (m, 2H), 1.46-1.48 (m, 2H), 1.35-1.36 (m, 4H), 0.90-0.93 (m, 3H);  $^{13}\text{C}$  NMR (100 MHz,  $\text{CDCl}_3$ )  $\delta$  164.7, 164.3, 161.86, 160.88, 160.2, 150.6, 138.9, 125.4, 114.8, 113.5, 68.8, 45.0, 31.7, 29.2, 28.6, 25.83, 22.79, 14.2; IR  $\nu_{\text{max}}$  ( $\text{cm}^{-1}$ ) 3421, 1726, 1699, 1648; ESIMS  $m/z$  331 [ $\text{M}+\text{H}^+$ ]; HRMS (ESI) for  $\text{C}_{18}\text{H}_{23}\text{N}_2\text{O}_4$  [ $\text{M}+\text{H}^+$ ] calcd: 331.1658, found: 331.1642.

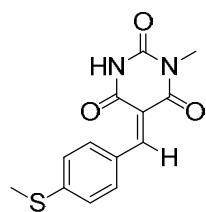

**7b** *E / Z* mixture

Yellow solid, analytical TLC (silica gel 60) (ethyl acetate)  $R_f = 0.2$ ; 82% isolated yield;  $^1\text{H}$  NMR (500 MHz,  $d^6$ -DMSO)  $\delta$  8.25 (d,  $J = 14.0$  Hz, 1H), 8.16-8.20 (t,  $J = 9.0$  Hz, 2H), 7.34 (d,  $J = 8.5$  Hz, 2H), 3.32 (s, 3H), 3.15 (d,  $J = 15$  Hz, 3H), 2.56 (s, 3H);  $^{13}\text{C}$  NMR (100 MHz,  $d^6$ -DMSO)  $\delta$  163.9 (162.9), 162.0 (161.4), 155.5 (154.9), 151.1 (151.0), 146.5 (146.4), 135.0, 129.1 (129.0), 124.81 (124.78), 117.8 (117.7), 28.2 (27.7), 14.30; IR  $\nu_{\text{max}}$  ( $\text{cm}^{-1}$ ) 3421, 1717, 1689; ESIMS  $m/z$  277 [ $\text{M}+\text{H}^+$ ].

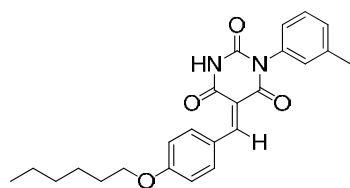

**7c** *E / Z* mixture

Yellow crystal, analytical TLC (silica gel 60) (25% ethyl acetate in *n*-hexane)  $R_f = 0.5$ ; 41% isolated yield; M.p. 172.2-175.4 °C;  $^1\text{H}$  NMR (500 MHz,  $\text{CDCl}_3$ )  $\delta$  8.60 (s, 1H), 8.39 (d,  $J = 7.0$  Hz, 2H), 8.67 (br s, 1H), 7.41 (t,  $J = 6.0$  Hz, 1H), 7.27-7.29 (m, 2H), 7.07-7.09 (m, 2H), 6.91 (d,  $J = 7.0$  Hz, 2H), 4.04 (t,  $J = 5.0$  Hz, 2H), 2.49 (s, 3H), 1.77-1.82 (m, 2H), 1.43-1.46 (m, 2H), 1.33-1.34 (m, 4H), 0.88-0.92 (3H);  $^{13}\text{C}$  NMR (100 MHz,  $\text{CDCl}_3$ )  $\delta$  165.0, 164.9, 164.2, 163.0, 161.9, 160.8, 160.7, 160.2, 150.0, 139.7, 139.6, 139.4, 139.0, 134.6, 134.3,



130.2, 130.1, 129.5, 129.41, 129.38, 129.2, 125.8, 125.7, 125.4, 125.3, 114.9, 114.8, 113.5, 113.4, 68.83, 68.80, 31.70, 31.68, 29.2, 29.1, 25.1, 25.78, 22.76, 22.7, 21.54, 21.52, 14.2; IR  $\nu_{\max}$  (cm<sup>-1</sup>) 3416, 1738, 1689, 1667; ESIMS  $m/z$  407 [M+H<sup>+</sup>]; HRMS (ESI) for C<sub>24</sub>H<sub>27</sub>N<sub>2</sub>O<sub>4</sub> [M+H]<sup>+</sup> calcd: 407.1971, found: 407.1965.

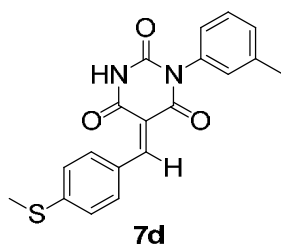

*E* / *Z* mixture

Yellow solid, analytical TLC (silica gel 60) (ethyl acetate)  $R_f = 0.2$ ; 53% isolated yield; M.p. 219.4-222.6 °C; <sup>1</sup>H NMR (500 MHz, *d*<sup>6</sup>-DMSO)  $\delta$  8.28 (d,  $J = 35.0$  Hz, 1H), 8.20 (d,  $J = 8.5$  Hz, 1H), 8.13 (d,  $J = 8.5$  Hz, 1H), 7.30-7.38 (m, 3H), 7.22-7.24 (m, 1H), 7.11 (m, 2H), 2.55 (d,  $J = 19.0$  Hz, 3H), 2.34, (s, 3H); <sup>13</sup>C NMR (100 MHz, *d*<sup>6</sup>-DMSO)  $\delta$  163.9 (163.2), 161.9 (161.7), 155.5 (155.3), 150.74 (150.66), 146.61 (146.55), 138.64 (138.62), 136.0(135.7), 135.1 (135.0), 130.0 (129.9), 129.4 (129.3), 129.07 (129.04), 128.95, 126.7 (126.5), 124.83 (124.75), 118.2 (118.0), 21.27, 21.26, 14.31, 14.29; IR  $\nu_{\max}$  (cm<sup>-1</sup>) 3448, 1731, 1697, 1675; ESIMS  $m/z$  353 [M+H<sup>+</sup>]; HRMS (ESI) for C<sub>19</sub>H<sub>17</sub>N<sub>2</sub>O<sub>3</sub>S [M+H]<sup>+</sup> calcd: 353.0960, found: 353.0970.

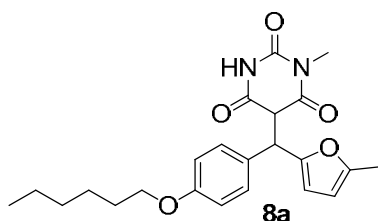

Brown oil, analytical TLC (silica gel 60) (25% ethyl acetate in *n*-hexane)  $R_f = 0.5$ ; 20% isolated yield; <sup>1</sup>H NMR (400 MHz, CDCl<sub>3</sub>)  $\delta$  7.96 (br s, 1H), 7.17-7.22 (m, 2H), 6.81-6.84 (m, 2H), 5.97 (dd,  $J = 2.8, 8.4$  Hz, 1H), 5.90 (br s, 1H), 4.91-4.93 (m, 1H), 4.19 (dd,  $J = 3.6, 15.2$  Hz, 1H), 3.93 (t,  $J = 6.4$  Hz, 2H), 3.13 (s, 3H), 2.26 (d,  $J = 4.8$  Hz, 3H), 1.73-1.80 (m, 2H), 1.45-1.47 (m, 2H), 1.33-1.35 (m, 4H), 0.89-0.92 (m, 3H); <sup>13</sup>C NMR (100 MHz, CDCl<sub>3</sub>)  $\delta$  168.1, 167.6, 159.1, 159.0, 151.8, 150.6, 150.4, 150.1, 129.9, 129.8, 128.1, 127.6, 114.6, 109.6, 109.5, 106.5, 106.4, 68.0, 53.8, 53.6, 48.0, 47.9, 31.6, 29.2, 27.64, 27.56, 25.7, 22.6, 14.0, 13.1; IR  $\nu_{\max}$  (cm<sup>-1</sup>) 3415, 1719, 1690; ESIMS  $m/z$  413 [M+H<sup>+</sup>]; HRMS (ESI) for C<sub>23</sub>H<sub>28</sub>N<sub>2</sub>O<sub>5</sub>Na [M+Na]<sup>+</sup> calcd: 435.1896, found: 435.1911.

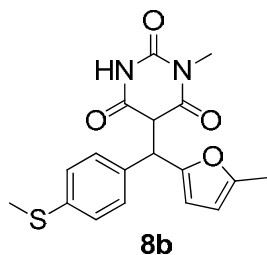

Yellow oil, analytical TLC (silica gel 60) (50% ethyl acetate in *n*-hexane)  $R_f = 0.5$ ; 20% isolated yield;  $^1\text{H NMR}$  (400 MHz,  $\text{CDCl}_3$ )  $\delta$  8.36 (br s, 1H), 7.21-7.28 (m, 4H), 5.99 (dd,  $J = 3.0, 9.5$  Hz, 1H), 5.92 (br s, 1H), 4.97-4.99 (m, 1H), 4.19 (dd,  $J = 3.5, 16.0$  Hz, 1H), 3.16 (d,  $J = 3.5$  Hz, 3H), 2.49 (s, 3H), 2.28 (d,  $J = 4.5$  Hz, 3H);  $^{13}\text{C NMR}$  (100 MHz,  $\text{CDCl}_3$ )  $\delta$  168.0, 167.8, 167.1, 166.7, 152.2, 150.3, 150.19, 150.17, 150.1, 139.1, 138.9, 133.6, 133.1, 129.5, 129.4, 126.62, 126.58, 110.0, 109.9, 106.74, 106.69, 53.7, 53.0, 48.0, 47.9, 45.0, 27.9, 27.9, 21.3, 15.8, 15.7, 14.4, 13.8; IR  $\nu_{\text{max}}$  ( $\text{cm}^{-1}$ ) 3428, 1717, 1688; ESIMS  $m/z$  359  $[\text{M}+\text{H}]^+$ .

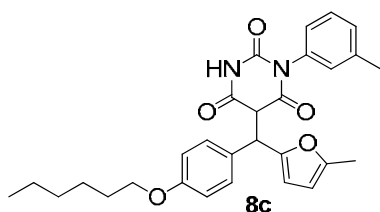

Brown oil, analytical TLC (silica gel 60) (25% ethyl acetate in *n*-hexane)  $R_f = 0.3$ ; 46% isolated yield;  $^1\text{H NMR}$  (400 MHz,  $\text{CDCl}_3$ )  $\delta$  8.54 (br d, 1H), 7.20-7.34 (m, 4H), 6.66-6.89 (m, 4H), 5.99 (dd,  $J = 3.0, 15.0$  Hz, 1H), 5.92 (dd,  $J = 2.5, 9.0$  Hz, 1H), 5.01 (dd,  $J = 3.5, 9.0$  Hz, 1H), 4.32 (t,  $J = 3.0$  Hz, 1H), 3.93-3.97 (m, 2H), 2.35 (s, 3H), 2.27-2.31 (d,  $J = 14.0$  Hz, 3H), 1.74-1.82 (m, 2H), 1.46 (m, 2H), 1.33-1.35 (m, 4H), 0.89-0.92 (m, 3H);  $^{13}\text{C NMR}$  (100 MHz,  $\text{CDCl}_3$ )  $\delta$  168.1, 167.7, 167.4, 166.9, 159.5, 159.4, 152.1, 152.1, 150.8, 150.7, 150.0, 139.6, 133.4, 130.4, 130.34, 130.29, 129.4, 129.0, 128.2, 128.0, 125.4, 114.91, 114.86, 110.0, 106.8, 106.7, 68.3, 54.2, 54.1, 48.6, 48.3, 31.8, 29.5, 29.4, 26.0, 25.9, 22.8, 21.5, 14.2, 13.9, 13.8; IR  $\nu_{\text{max}}$  ( $\text{cm}^{-1}$ ) 3416, 1698; ESIMS  $m/z$  488  $[\text{M}+\text{H}]^+$ ; HRMS (ESI) for  $\text{C}_{29}\text{H}_{32}\text{N}_2\text{O}_5\text{Na}$   $[\text{M}+\text{Na}]^+$  calcd: 511.2209, found: 511.2218.

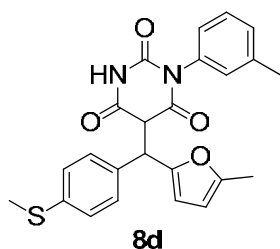

Yellow oil, analytical TLC (silica gel 60) (50% ethyl acetate in *n*-hexane)  $R_f = 0.6$ ; 75%

isolated yield;  $^1\text{H}$  NMR (400 MHz,  $\text{CDCl}_3$ )  $\delta$  8.40 (br d, 1H), 7.21-7.33 (m, 6H), 6.67-6.78 (m, 2H), 6.00 (dd,  $J = 3.0, 21.0$  Hz, 1H), 5.92-5.94 (m, 1H), 5.03-5.04 (m, 1H), 4.29 (t,  $J = 4.0$  Hz, 1H), 2.47 (s, 3H), 2.35 (s, 3H), 2.28 (d,  $J = 13.6$  Hz, 3H);  $^{13}\text{C}$  NMR (100 MHz,  $\text{CDCl}_3$ )  $\delta$  167.9, 167.7, 152.31, 152.30, 150.31, 150.26, 149.9, 139.7, 139.2, 139.1, 133.5, 133.4, 130.3, 129.8, 129.7, 129.4, 129.99, 128.97, 126.70, 126.66, 125.4, 110.2, 106.9, 106.8, 60.7, 54.0, 53.9, 48.3, 48.2, 45.0, 21.5, 21.5, 21.3, 15.8, 15.7, 14.4, 13.9, 13.8; IR  $\nu_{\text{max}}$  ( $\text{cm}^{-1}$ ) 3420, 1755, 1701; ESIMS  $m/z$  435 [ $\text{M}+\text{H}^+$ ]; HRMS (ESI) for  $\text{C}_{24}\text{H}_{22}\text{N}_2\text{O}_4\text{SNa}$  [ $\text{M}+\text{Na}$ ] $^+$  calcd: 457.1198, found: 457.1184.

## **<sup>1</sup>H NMR Kinetics Study of Conjugate Addition of 5a<sup>[1]</sup>**

All reactions were conducted with 0.025 mmol of benzylidene barbiturate **5a**, 0.25 mmol of 2-methylfuran, 0.03 mmol of internal standard dichloromethane and 20 mol % HB-DAD organocatalysts. Stock solutions of **5a** (0.083 M; 0.05 mmol of **5a** in 0.6 mL of CDCl<sub>3</sub>) and the HB-DAD organocatalysts (0.05 M; 0.01 mmol of HB-DAD organocatalysts in 0.2 mL of CDCl<sub>3</sub>) were prepared in 2 mL vials. A NMR tube was charged with 0.3 mL of **5a** stock solution followed by 0.1 mL of HB-DAD organocatalysts stock solution and 1.98 μL of CH<sub>2</sub>Cl<sub>2</sub>. The mixture was made up to 0.5 mL with CDCl<sub>3</sub>. After adding 22.3 μL of 2-methylfuran, the first NMR spectrum was taken 5 min after the addition. Additional NMR spectra were recorded every 5 min for a total of 120 min.

The methylene peak of CH<sub>2</sub>Cl<sub>2</sub> (5.3, singlet, 2H) was monitored with the ratio of product signal (4.91, multiplet, 1H) that was calibrated as 1. The number of mole of product was calculated based on the known number of mole of internal standard CH<sub>2</sub>Cl<sub>2</sub> in the reaction using:

### **A) Calculation of Concentration of Products**

No. of mmol of product = [mmol of CH<sub>2</sub>Cl<sub>2</sub> x 2 / Ratio of CH<sub>2</sub>Cl<sub>2</sub> signal]

[Concentration of product] = No. of mmol of product / 0.5mL

### **B) Plot of ln [Concentration of 5a] vs time.**

With a 10-fold excess of 2-methylfuran, all conjugate additions of **5a** were pseudo-first-order, and the corresponding rate constant  $k_{obs}$  were determined the slope of the plot of the ln (0.05 – [Concentration of product]) vs time.

### **C) Calculation of Relative Rate Constants ( $k_{rel}$ ), $k_{cat}$ and $k_{uncata}$**

**1a**-catalyzed reaction:  $k_{obs(1a)} = 0.00015466 \text{ s}^{-1}$

Uncatalyzed reaction:  $k_{obs(background)} = k_{uncata} = 0.00003766 \text{ s}^{-1}$

$$k_{cat} = k_{obs(1a)} - k_{uncata}$$

$$= 0.00015466 - 0.00003766$$

$$= 0.00011700 \text{ s}^{-1}$$

$$k_{rel} = k_{cat} / k_{uncata}$$

$$= 0.00011700 / 0.00003766$$

$$= 3.12 \text{ at } 20 \text{ mol\% of } \mathbf{1a}$$

**Table S6.** Rate constants determinations with <sup>1</sup>H NMR studies

| Catalysts | $k_{obs} \times 10^{-4} \text{ (s}^{-1}\text{)}$ | $k_{cat} \times 10^{-4} \text{ (s}^{-1}\text{)}$ | $k_{rel}$ |
|-----------|--------------------------------------------------|--------------------------------------------------|-----------|
| -----     | 0.4288                                           | $k_{uncata} = 0.4288$                            | 1.0       |
| -----     | 0.3244                                           | $k_{uncata} = 0.3244$                            | 1.0       |
| <b>1a</b> | 1.5466                                           | 1.17                                             | 3.10      |
| <b>1a</b> | 1.4221                                           | 1.0455                                           | 2.77      |
| <b>1b</b> | 1.0437                                           | 0.6671                                           | 1.77      |
| <b>1b</b> | 1.0548                                           | 0.6782                                           | 1.80      |
| <b>1c</b> | 0.3662                                           | -0.0104                                          | -0.027    |
| <b>2a</b> | 1.2174                                           | 0.8408                                           | 2.23      |
| <b>2a</b> | 1.2239                                           | 0.8473                                           | 2.25      |
| <b>2b</b> | 0.9275                                           | 0.5509                                           | 1.46      |
| <b>2b</b> | 0.8725                                           | 0.4959                                           | 1.33      |
| <b>3a</b> | 0.8178                                           | 0.4412                                           | 1.17      |

**Reference of Kinetics Study:**

[1] a) A. Wittkopp, P. R. Schreiner, *Chem. Eur. J.* 2003, **9**, 407; b) P. N. H. Huynh, R. R.

Walvoord, M. C. Kozlowski, *J. Am. Chem. Soc.* 2012, **134**, 15621.

First Trial-[**5a** (0.025 mmol); 2-methylfuran( 0.25 mmol); **1a** (0.005 mmol); CDCl<sub>3</sub>(0.5 mL)]

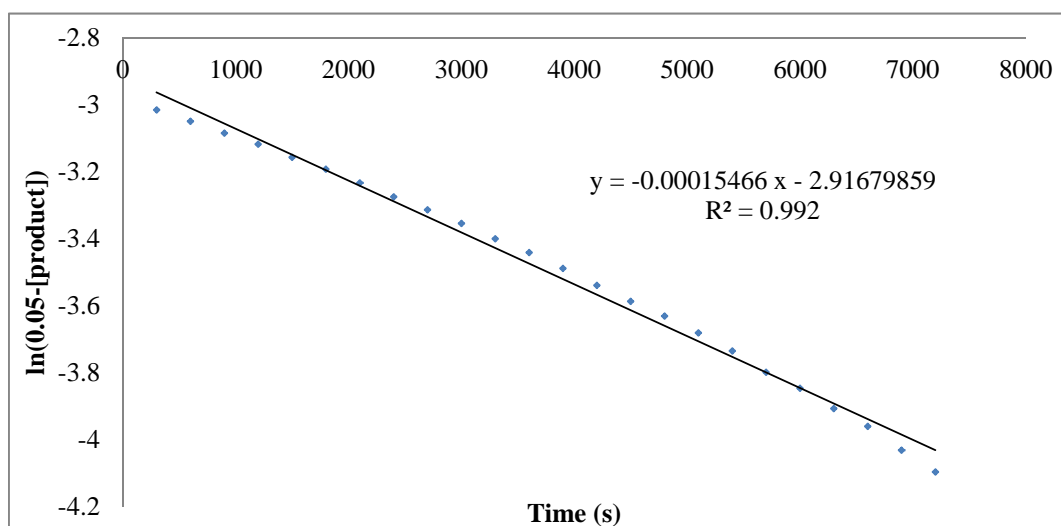

| Time (min) | Time (s) | Integration | mmol    | NMR Yield (%) | [product] | 0.05-[product] | ln(0.05-[product]) |
|------------|----------|-------------|---------|---------------|-----------|----------------|--------------------|
| 5          | 300      | 137.608     | 0.00044 | 1.7           | 0.0009    | 0.0491         | -3.013             |
| 10         | 600      | 56.381      | 0.00106 | 4.3           | 0.0021    | 0.0479         | -3.039             |
| 15         | 900      | 33.776      | 0.00178 | 7.1           | 0.0036    | 0.0464         | -3.069             |
| 20         | 1200     | 20.943      | 0.00286 | 11.5          | 0.0057    | 0.0443         | -3.117             |
| 25         | 1500     | 16.149      | 0.00372 | 14.9          | 0.0074    | 0.0426         | -3.157             |
| 30         | 1800     | 13.483      | 0.00445 | 17.8          | 0.0089    | 0.0411         | -3.192             |
| 35         | 2100     | 11.359      | 0.00528 | 21.1          | 0.0106    | 0.0394         | -3.233             |
| 40         | 2400     | 9.863       | 0.00608 | 24.3          | 0.0122    | 0.0378         | -3.275             |
| 45         | 2700     | 8.819       | 0.00680 | 27.2          | 0.0136    | 0.0364         | -3.313             |
| 50         | 3000     | 7.976       | 0.00752 | 30.1          | 0.0150    | 0.0350         | -3.354             |
| 55         | 3300     | 7.220       | 0.00831 | 33.2          | 0.0166    | 0.0334         | -3.400             |
| 60         | 3600     | 6.684       | 0.00898 | 35.9          | 0.0180    | 0.0320         | -3.441             |
| 65         | 3900     | 6.173       | 0.00972 | 38.9          | 0.0194    | 0.0306         | -3.488             |
| 70         | 4200     | 5.729       | 0.01047 | 41.9          | 0.0209    | 0.0291         | -3.539             |
| 75         | 4500     | 5.381       | 0.01115 | 44.6          | 0.0223    | 0.0277         | -3.586             |
| 80         | 4800     | 5.108       | 0.01175 | 47.0          | 0.0235    | 0.0265         | -3.630             |
| 85         | 5100     | 4.842       | 0.01239 | 49.6          | 0.0248    | 0.0252         | -3.680             |
| 90         | 5400     | 4.596       | 0.01306 | 52.2          | 0.0261    | 0.0239         | -3.734             |
| 95         | 5700     | 4.351       | 0.01379 | 55.2          | 0.0276    | 0.0224         | -3.798             |
| 100        | 6000     | 4.192       | 0.01431 | 57.3          | 0.0286    | 0.0214         | -3.846             |
| 105        | 6300     | 4.016       | 0.01494 | 59.8          | 0.0299    | 0.0201         | -3.906             |
| 110        | 6600     | 3.880       | 0.01546 | 61.9          | 0.0309    | 0.0191         | -3.959             |
| 115        | 6900     | 3.723       | 0.01611 | 64.5          | 0.0322    | 0.0178         | -4.030             |
| 120        | 7200     | 3.598       | 0.01668 | 66.7          | 0.0334    | 0.0166         | -4.096             |

Second Trial-[**5a** (0.025 mmol); 2-methylfuran( 0.25 mmol); **1a** (0.005 mmol); CDCl<sub>3</sub>(0.5 mL)]

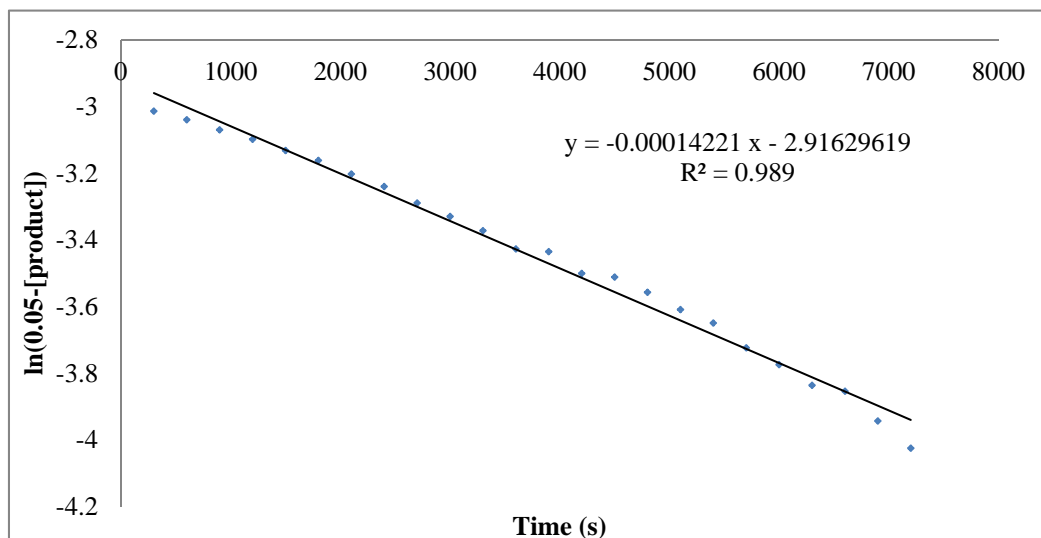

| Time (min) | Time (s) | Integration | mmol    | NMR Yield (%) | [product] | 0.05-[product] | ln(0.05-[product]) |
|------------|----------|-------------|---------|---------------|-----------|----------------|--------------------|
| 5          | 300      | 137.608     | 0.00044 | 1.7           | 0.0009    | 0.0491         | -3.013             |
| 10         | 600      | 56.381      | 0.00106 | 4.3           | 0.0021    | 0.0479         | -3.039             |
| 15         | 900      | 33.776      | 0.00178 | 7.1           | 0.0036    | 0.0464         | -3.069             |
| 20         | 1200     | 24.711      | 0.00243 | 9.7           | 0.0049    | 0.0451         | -3.098             |
| 25         | 1500     | 18.949      | 0.00317 | 12.7          | 0.0063    | 0.0437         | -3.131             |
| 30         | 1800     | 15.761      | 0.00381 | 15.2          | 0.0076    | 0.0424         | -3.161             |
| 35         | 2100     | 12.889      | 0.00466 | 18.6          | 0.0093    | 0.0407         | -3.202             |
| 40         | 2400     | 11.096      | 0.00541 | 21.6          | 0.0108    | 0.0392         | -3.239             |
| 45         | 2700     | 9.441       | 0.00636 | 25.4          | 0.0127    | 0.0373         | -3.289             |
| 50         | 3000     | 8.466       | 0.00709 | 28.3          | 0.0142    | 0.0358         | -3.329             |
| 55         | 3300     | 7.653       | 0.00784 | 31.4          | 0.0157    | 0.0343         | -3.372             |
| 60         | 3600     | 6.856       | 0.00875 | 35.0          | 0.0175    | 0.0325         | -3.427             |
| 65         | 3900     | 6.750       | 0.00889 | 35.6          | 0.0178    | 0.0322         | -3.435             |
| 70         | 4200     | 6.056       | 0.00991 | 39.6          | 0.0198    | 0.0302         | -3.500             |
| 75         | 4500     | 5.958       | 0.01007 | 40.3          | 0.0201    | 0.0299         | -3.511             |
| 80         | 4800     | 5.587       | 0.01074 | 43.0          | 0.0215    | 0.0285         | -3.557             |
| 85         | 5100     | 5.235       | 0.01146 | 45.8          | 0.0229    | 0.0271         | -3.609             |
| 90         | 5400     | 5.002       | 0.01200 | 48.0          | 0.0240    | 0.0260         | -3.649             |
| 95         | 5700     | 4.641       | 0.01293 | 51.7          | 0.0259    | 0.0241         | -3.724             |
| 100        | 6000     | 4.436       | 0.01352 | 54.1          | 0.0270    | 0.0230         | -3.774             |
| 105        | 6300     | 4.222       | 0.01421 | 56.8          | 0.0284    | 0.0216         | -3.836             |
| 110        | 6600     | 4.165       | 0.01441 | 57.6          | 0.0288    | 0.0212         | -3.854             |
| 115        | 6900     | 3.919       | 0.01531 | 61.2          | 0.0306    | 0.0194         | -3.944             |
| 120        | 7200     | 3.734       | 0.01607 | 64.3          | 0.0321    | 0.0179         | -4.025             |

First Trial-[**5a** (0.025 mmol); 2-methylfuran( 0.25 mmol); **2a** (0.005 mmol); CDCl<sub>3</sub>(0.5 mL)]

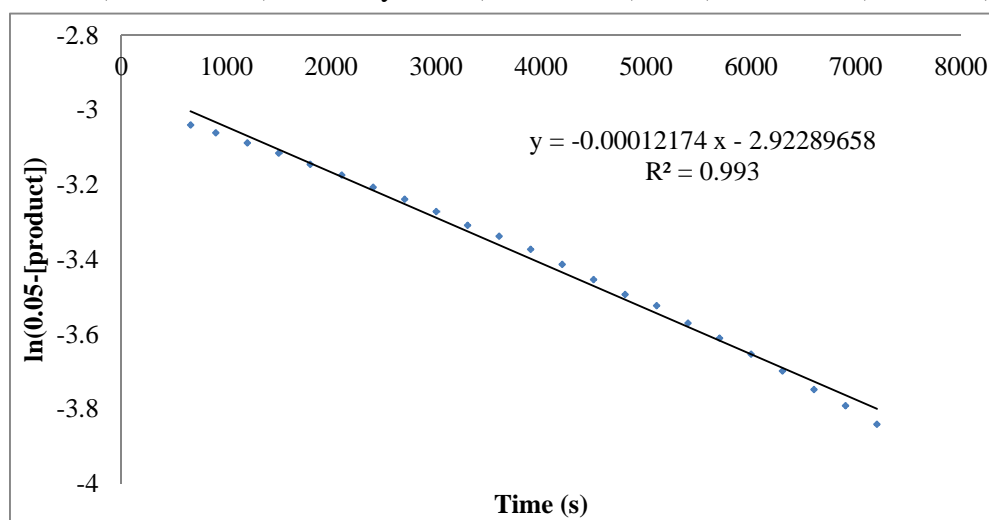

| Time (min) | Time (s) | Integration | mmol    | NMR Yield (%) | [product] | 0.05-[product] | ln(0.05-[product]) |
|------------|----------|-------------|---------|---------------|-----------|----------------|--------------------|
| 11         | 660      | 55.682      | 0.00108 | 4.3           | 0.0022    | 0.0478         | -3.040             |
| 15         | 900      | 37.982      | 0.00158 | 6.3           | 0.0032    | 0.0468         | -3.061             |
| 20         | 1200     | 27.212      | 0.00220 | 8.8           | 0.0044    | 0.0456         | -3.088             |
| 25         | 1500     | 21.283      | 0.00282 | 11.3          | 0.0056    | 0.0444         | -3.115             |
| 30         | 1800     | 17.254      | 0.00348 | 13.9          | 0.0070    | 0.0430         | -3.146             |
| 35         | 2100     | 14.687      | 0.00409 | 16.3          | 0.0082    | 0.0418         | -3.174             |
| 40         | 2400     | 12.634      | 0.00475 | 19.0          | 0.0095    | 0.0405         | -3.206             |
| 45         | 2700     | 11.124      | 0.00539 | 21.6          | 0.0108    | 0.0392         | -3.239             |
| 50         | 3000     | 9.957       | 0.00603 | 24.1          | 0.0121    | 0.0379         | -3.272             |
| 55         | 3300     | 8.942       | 0.00671 | 26.8          | 0.0134    | 0.0366         | -3.308             |
| 60         | 3600     | 8.285       | 0.00724 | 29.0          | 0.0145    | 0.0355         | -3.338             |
| 65         | 3900     | 7.642       | 0.00785 | 31.4          | 0.0157    | 0.0343         | -3.373             |
| 70         | 4200     | 7.038       | 0.00852 | 34.1          | 0.0170    | 0.0330         | -3.413             |
| 75         | 4500     | 6.532       | 0.00919 | 36.7          | 0.0184    | 0.0316         | -3.454             |
| 80         | 4800     | 6.122       | 0.00980 | 39.2          | 0.0196    | 0.0304         | -3.493             |
| 85         | 5100     | 5.853       | 0.01025 | 41.0          | 0.0205    | 0.0295         | -3.523             |
| 90         | 5400     | 5.494       | 0.01092 | 43.7          | 0.0218    | 0.0282         | -3.570             |
| 95         | 5700     | 5.228       | 0.01148 | 45.9          | 0.0230    | 0.0270         | -3.610             |
| 100        | 6000     | 4.982       | 0.01204 | 48.2          | 0.0241    | 0.0259         | -3.653             |
| 105        | 6300     | 4.756       | 0.01262 | 50.5          | 0.0252    | 0.0248         | -3.698             |
| 110        | 6600     | 4.540       | 0.01322 | 52.9          | 0.0264    | 0.0236         | -3.748             |
| 115        | 6900     | 4.374       | 0.01372 | 54.9          | 0.0274    | 0.0226         | -3.791             |
| 120        | 7200     | 4.207       | 0.01426 | 57.1          | 0.0285    | 0.0215         | -3.841             |



Second Trial-[**5a** (0.025 mmol); 2-methylfuran( 0.25 mmol); **2a** (0.005 mmol); CDCl<sub>3</sub>(0.5 mL)]

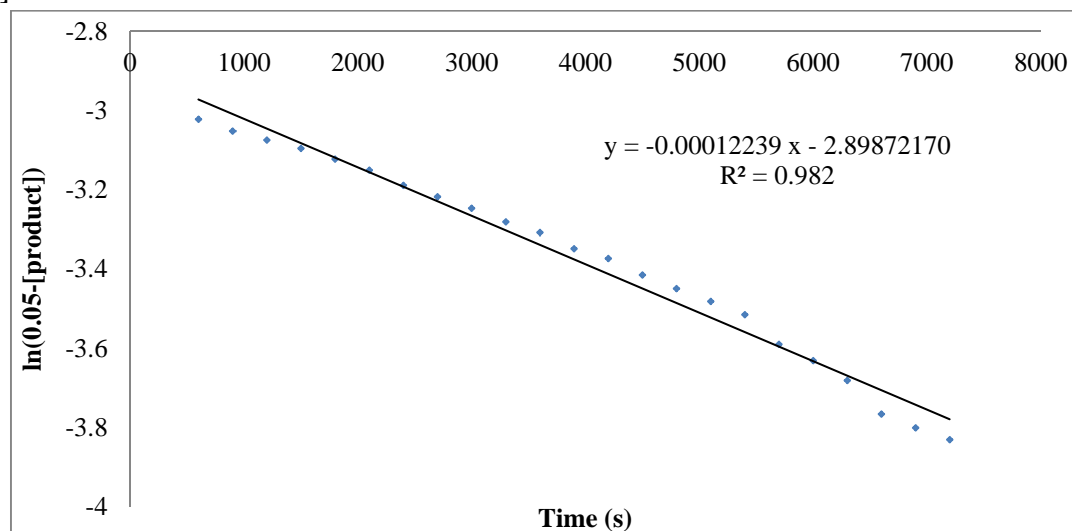

| Time (min) | Time (s) | Integration | mmol    | NMR Yield (%) | [product] | 0.05-[product] | ln(0.05-[product]) |
|------------|----------|-------------|---------|---------------|-----------|----------------|--------------------|
| 5          | 300      | 242.841     | 0.00025 | 1.0           | 0.0005    | 0.0495         | -3.006             |
| 10         | 600      | 92.072      | 0.00065 | 2.6           | 0.0013    | 0.0487         | -3.022             |
| 15         | 900      | 44.052      | 0.00136 | 5.4           | 0.0027    | 0.0473         | -3.052             |
| 20         | 1200     | 31.731      | 0.00189 | 7.6           | 0.0038    | 0.0462         | -3.074             |
| 25         | 1500     | 25.261      | 0.00238 | 9.5           | 0.0048    | 0.0452         | -3.096             |
| 30         | 1800     | 20.107      | 0.00298 | 11.9          | 0.0060    | 0.0440         | -3.123             |
| 35         | 2100     | 16.723      | 0.00359 | 14.4          | 0.0072    | 0.0428         | -3.151             |
| 40         | 2400     | 13.651      | 0.00440 | 17.6          | 0.0088    | 0.0412         | -3.189             |
| 45         | 2700     | 12.061      | 0.00497 | 19.9          | 0.0099    | 0.0401         | -3.218             |
| 50         | 3000     | 10.807      | 0.00555 | 22.2          | 0.0111    | 0.0389         | -3.247             |
| 55         | 3300     | 9.668       | 0.00621 | 24.8          | 0.0124    | 0.0376         | -3.281             |
| 60         | 3600     | 8.956       | 0.00670 | 26.8          | 0.0134    | 0.0366         | -3.308             |
| 65         | 3900     | 8.065       | 0.00744 | 29.8          | 0.0149    | 0.0351         | -3.349             |
| 70         | 4200     | 7.628       | 0.00787 | 31.5          | 0.0157    | 0.0343         | -3.374             |
| 75         | 4500     | 7.001       | 0.00857 | 34.3          | 0.0171    | 0.0329         | -3.416             |
| 80         | 4800     | 6.576       | 0.00912 | 36.5          | 0.0182    | 0.0318         | -3.450             |
| 85         | 5100     | 6.231       | 0.00963 | 38.5          | 0.0193    | 0.0307         | -3.482             |
| 90         | 5400     | 5.922       | 0.01013 | 40.5          | 0.0203    | 0.0297         | -3.515             |
| 95         | 5700     | 5.353       | 0.01121 | 44.8          | 0.0224    | 0.0276         | -3.591             |
| 100        | 6000     | 5.100       | 0.01176 | 47.1          | 0.0235    | 0.0265         | -3.632             |
| 105        | 6300     | 4.834       | 0.01241 | 49.7          | 0.0248    | 0.0252         | -3.682             |
| 110        | 6600     | 4.466       | 0.01343 | 53.7          | 0.0269    | 0.0231         | -3.767             |
| 115        | 6900     | 4.338       | 0.01383 | 55.3          | 0.0277    | 0.0223         | -3.802             |
| 120        | 7200     | 4.237       | 0.01416 | 56.6          | 0.0283    | 0.0217         | -3.832             |

First Trial-[**5a** (0.025 mmol); 2-methylfuran( 0.25 mmol); **1b** (0.005 mmol); CDCl<sub>3</sub>(0.5 mL)]

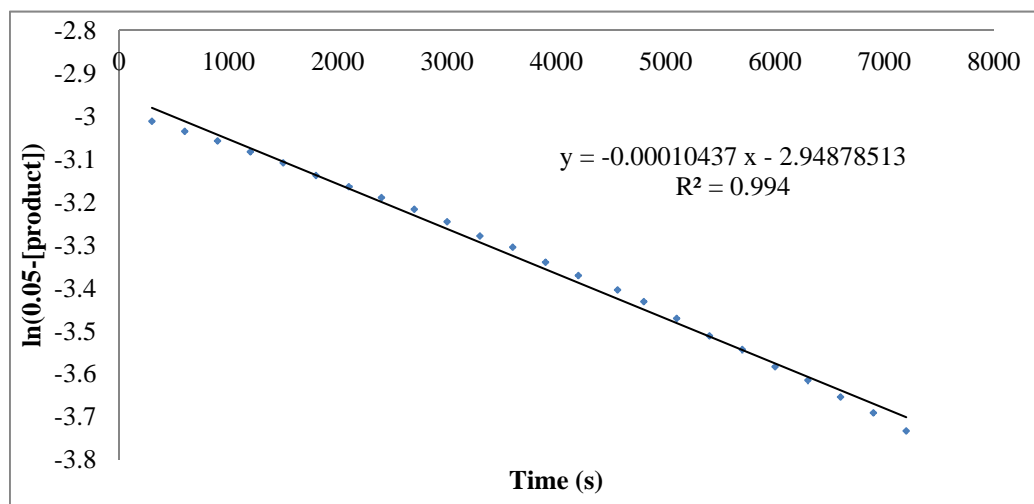

| Time (min) | Time (s) | Integration | mmol    | NMR Yield (%) | [product] | 0.05-[product] | ln(0.05-[product]) |
|------------|----------|-------------|---------|---------------|-----------|----------------|--------------------|
| 5          | 300      | 154.393     | 0.00039 | 1.6           | 0.0008    | 0.0492         | -3.011             |
| 10         | 600      | 62.603      | 0.00096 | 3.8           | 0.0019    | 0.0481         | -3.035             |
| 15         | 900      | 40.411      | 0.00148 | 5.9           | 0.0030    | 0.0470         | -3.057             |
| 20         | 1200     | 28.940      | 0.00207 | 8.3           | 0.0041    | 0.0459         | -3.082             |
| 25         | 1500     | 22.553      | 0.00266 | 10.6          | 0.0053    | 0.0447         | -3.108             |
| 30         | 1800     | 18.152      | 0.00331 | 13.2          | 0.0066    | 0.0434         | -3.138             |
| 35         | 2100     | 15.512      | 0.00387 | 15.5          | 0.0077    | 0.0423         | -3.164             |
| 40         | 2400     | 13.650      | 0.00440 | 17.6          | 0.0088    | 0.0412         | -3.189             |
| 45         | 2700     | 12.135      | 0.00494 | 19.8          | 0.0099    | 0.0401         | -3.216             |
| 50         | 3000     | 10.870      | 0.00552 | 22.1          | 0.0110    | 0.0390         | -3.245             |
| 55         | 3300     | 9.741       | 0.00616 | 24.6          | 0.0123    | 0.0377         | -3.279             |
| 60         | 3600     | 9.035       | 0.00664 | 26.6          | 0.0133    | 0.0367         | -3.304             |
| 65         | 3900     | 8.247       | 0.00728 | 29.1          | 0.0146    | 0.0354         | -3.340             |
| 70         | 4200     | 7.678       | 0.00781 | 31.3          | 0.0156    | 0.0344         | -3.371             |
| 76         | 4560     | 7.161       | 0.00838 | 33.5          | 0.0168    | 0.0332         | -3.404             |
| 80         | 4800     | 6.798       | 0.00883 | 35.3          | 0.0177    | 0.0323         | -3.431             |
| 85         | 5100     | 6.352       | 0.00945 | 37.8          | 0.0189    | 0.0311         | -3.470             |
| 90         | 5400     | 5.961       | 0.01006 | 40.3          | 0.0201    | 0.0299         | -3.511             |
| 95         | 5700     | 5.698       | 0.01053 | 42.1          | 0.0211    | 0.0289         | -3.543             |
| 100        | 6000     | 5.405       | 0.01110 | 44.4          | 0.0222    | 0.0278         | -3.583             |
| 105        | 6300     | 5.204       | 0.01153 | 46.1          | 0.0231    | 0.0269         | -3.614             |
| 110        | 6600     | 4.980       | 0.01205 | 48.2          | 0.0241    | 0.0259         | -3.653             |
| 115        | 6900     | 4.795       | 0.01251 | 50.1          | 0.0250    | 0.0250         | -3.690             |
| 120        | 7200     | 4.604       | 0.01303 | 52.1          | 0.0261    | 0.0239         | -3.732             |

Second Trial-[**5a** (0.025 mmol); 2-methylfuran( 0.25 mmol); **1b** (0.005 mmol); CDCl<sub>3</sub>(0.5 mL)]

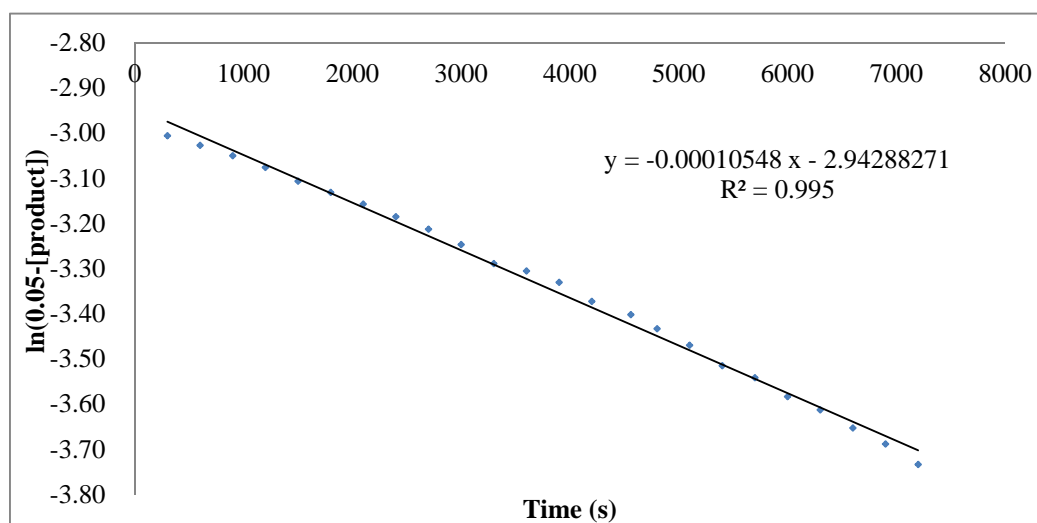

| Time(min) | Time(s) | Integration | mmol    | NMR Yield (%) | [product] | 0.05-[product] | ln(0.05-[product]) |
|-----------|---------|-------------|---------|---------------|-----------|----------------|--------------------|
| 5         | 300     | 241.987     | 0.00025 | 1.0           | 0.0005    | 0.0495         | -3.006             |
| 10        | 600     | 77.849      | 0.00077 | 3.1           | 0.0015    | 0.0485         | -3.027             |
| 15        | 900     | 45.425      | 0.00132 | 5.3           | 0.0026    | 0.0474         | -3.050             |
| 20        | 1200    | 31.206      | 0.00192 | 7.7           | 0.0038    | 0.0462         | -3.076             |
| 25        | 1500    | 22.889      | 0.00262 | 10.5          | 0.0052    | 0.0448         | -3.107             |
| 30        | 1800    | 18.958      | 0.00316 | 12.7          | 0.0063    | 0.0437         | -3.131             |
| 35        | 2100    | 16.114      | 0.00372 | 14.9          | 0.0074    | 0.0426         | -3.157             |
| 40        | 2400    | 13.918      | 0.00431 | 17.2          | 0.0086    | 0.0414         | -3.185             |
| 45        | 2700    | 12.299      | 0.00488 | 19.5          | 0.0098    | 0.0402         | -3.213             |
| 50        | 3000    | 10.812      | 0.00555 | 22.2          | 0.0111    | 0.0389         | -3.247             |
| 55        | 3300    | 9.446       | 0.00635 | 25.4          | 0.0127    | 0.0373         | -3.289             |
| 60        | 3600    | 9.011       | 0.00666 | 26.6          | 0.0133    | 0.0367         | -3.305             |
| 65        | 3900    | 8.436       | 0.00711 | 28.4          | 0.0142    | 0.0358         | -3.330             |
| 70        | 4200    | 7.646       | 0.00785 | 31.4          | 0.0157    | 0.0343         | -3.372             |
| 76        | 4560    | 7.190       | 0.00835 | 33.4          | 0.0167    | 0.0333         | -3.402             |
| 80        | 4800    | 6.772       | 0.00886 | 35.4          | 0.0177    | 0.0323         | -3.433             |
| 85        | 5100    | 6.357       | 0.00944 | 37.8          | 0.0189    | 0.0311         | -3.470             |
| 90        | 5400    | 5.923       | 0.01013 | 40.5          | 0.0203    | 0.0297         | -3.515             |
| 95        | 5700    | 5.704       | 0.01052 | 42.1          | 0.0210    | 0.0290         | -3.542             |
| 100       | 6000    | 5.399       | 0.01111 | 44.5          | 0.0222    | 0.0278         | -3.584             |
| 105       | 6300    | 5.211       | 0.01151 | 46.1          | 0.0230    | 0.0270         | -3.613             |
| 110       | 6600    | 4.982       | 0.01204 | 48.2          | 0.0241    | 0.0259         | -3.653             |
| 115       | 6900    | 4.801       | 0.01250 | 50.0          | 0.0250    | 0.0250         | -3.689             |
| 120       | 7200    | 4.598       | 0.01305 | 52.2          | 0.0261    | 0.0239         | -3.734             |

First Trial-[**5a** (0.025 mmol); 2-methylfuran( 0.25 mmol); **2b** (0.005 mmol); CDCl<sub>3</sub>(0.5 mL)]

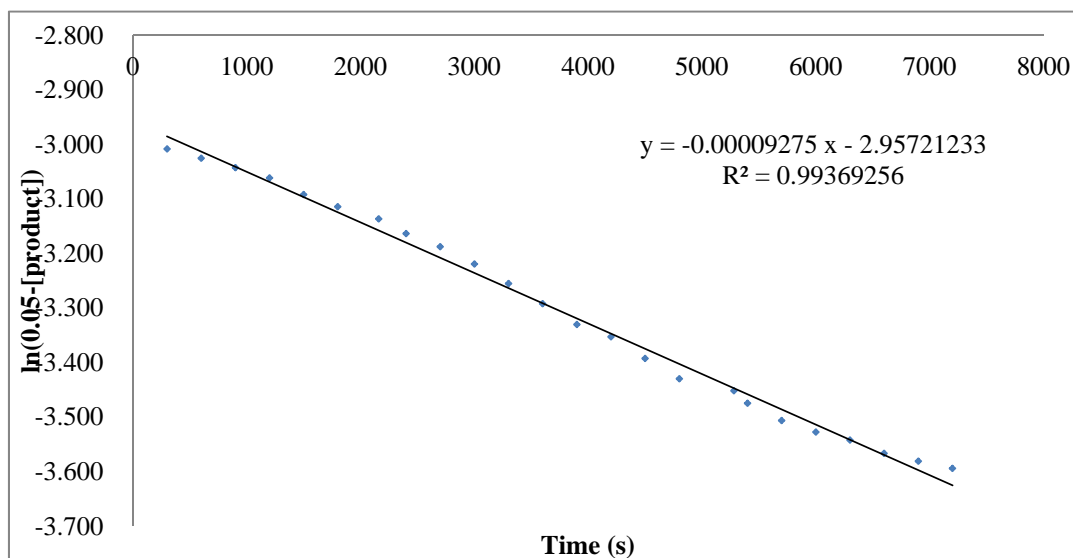

| Time (min) | Time (s) | Integration | mmol    | NMR Yield (%) | [product] | 0.05-[product] | ln(0.05-[product]) |
|------------|----------|-------------|---------|---------------|-----------|----------------|--------------------|
| 5          | 300      | 195.361     | 0.00031 | 1.2           | 0.0006    | 0.0494         | -3.008             |
| 10         | 600      | 82.549      | 0.00073 | 2.9           | 0.0015    | 0.0485         | -3.025             |
| 15         | 900      | 52.693      | 0.00114 | 4.6           | 0.0023    | 0.0477         | -3.042             |
| 20         | 1200     | 37.759      | 0.00159 | 6.4           | 0.0032    | 0.0468         | -3.061             |
| 25         | 1500     | 26.193      | 0.00229 | 9.2           | 0.0046    | 0.0454         | -3.092             |
| 30         | 1800     | 21.500      | 0.00279 | 11.2          | 0.0056    | 0.0444         | -3.114             |
| 36         | 2160     | 18.286      | 0.00328 | 13.1          | 0.0066    | 0.0434         | -3.136             |
| 40         | 2400     | 15.552      | 0.00386 | 15.4          | 0.0077    | 0.0423         | -3.163             |
| 45         | 2700     | 13.757      | 0.00436 | 17.4          | 0.0087    | 0.0413         | -3.187             |
| 50         | 3000     | 11.985      | 0.00501 | 20.0          | 0.0100    | 0.0400         | -3.219             |
| 55         | 3300     | 10.512      | 0.00571 | 22.8          | 0.0114    | 0.0386         | -3.255             |
| 60         | 3600     | 9.361       | 0.00641 | 25.6          | 0.0128    | 0.0372         | -3.292             |
| 65         | 3900     | 8.445       | 0.00710 | 28.4          | 0.0142    | 0.0358         | -3.330             |
| 70         | 4200     | 7.996       | 0.00750 | 30.0          | 0.0150    | 0.0350         | -3.353             |
| 75         | 4500     | 7.329       | 0.00819 | 32.7          | 0.0164    | 0.0336         | -3.392             |
| 80         | 4800     | 6.819       | 0.00880 | 35.2          | 0.0176    | 0.0324         | -3.430             |
| 88         | 5280     | 6.557       | 0.00915 | 36.6          | 0.0183    | 0.0317         | -3.452             |
| 90         | 5400     | 6.309       | 0.00951 | 38.0          | 0.0190    | 0.0310         | -3.474             |
| 95         | 5700     | 6.003       | 0.00999 | 40.0          | 0.0200    | 0.0300         | -3.506             |
| 100        | 6000     | 5.822       | 0.01031 | 41.2          | 0.0206    | 0.0294         | -3.527             |
| 105        | 6300     | 5.702       | 0.01052 | 42.1          | 0.0210    | 0.0290         | -3.542             |
| 110        | 6600     | 5.520       | 0.01087 | 43.5          | 0.0217    | 0.0283         | -3.566             |
| 115        | 6900     | 5.419       | 0.01107 | 44.3          | 0.0221    | 0.0279         | -3.581             |
| 120        | 7200     | 5.332       | 0.01125 | 45.0          | 0.0225    | 0.0275         | -3.594             |

Second Trial-[**5a** (0.025 mmol); 2-methylfuran( 0.25 mmol); **1a** (0.005 mmol); CDCl<sub>3</sub>(0.5 mL)]

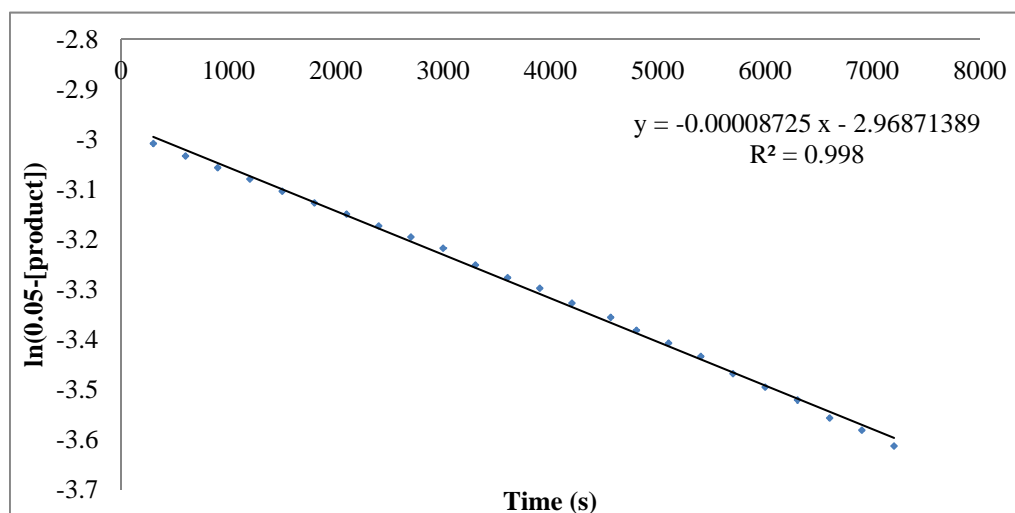

| Time (min) | Time (s) | Integration | mmol    | NMR Yield (%) | [product] | 0.05-[product] | ln(0.05-[product]) |
|------------|----------|-------------|---------|---------------|-----------|----------------|--------------------|
| 5          | 300      | 194.663     | 0.00031 | 1.2           | 0.0006    | 0.0494         | -3.008             |
| 10         | 600      | 65.329      | 0.00092 | 3.7           | 0.0018    | 0.0482         | -3.033             |
| 15         | 900      | 40.720      | 0.00147 | 5.9           | 0.0029    | 0.0471         | -3.056             |
| 20         | 1200     | 30.016      | 0.00200 | 8.0           | 0.0040    | 0.0460         | -3.079             |
| 25         | 1500     | 23.477      | 0.00256 | 10.2          | 0.0051    | 0.0449         | -3.104             |
| 30         | 1800     | 19.556      | 0.00307 | 12.3          | 0.0061    | 0.0439         | -3.127             |
| 35         | 2100     | 16.861      | 0.00356 | 14.2          | 0.0071    | 0.0429         | -3.149             |
| 40         | 2400     | 14.775      | 0.00406 | 16.2          | 0.0081    | 0.0419         | -3.173             |
| 45         | 2700     | 13.278      | 0.00452 | 18.1          | 0.0090    | 0.0410         | -3.195             |
| 50         | 3000     | 12.074      | 0.00497 | 19.9          | 0.0099    | 0.0401         | -3.217             |
| 55         | 3300     | 10.657      | 0.00563 | 22.5          | 0.0113    | 0.0387         | -3.251             |
| 60         | 3600     | 9.813       | 0.00611 | 24.5          | 0.0122    | 0.0378         | -3.276             |
| 65         | 3900     | 9.213       | 0.00651 | 26.0          | 0.0130    | 0.0370         | -3.298             |
| 70         | 4200     | 8.508       | 0.00705 | 28.2          | 0.0141    | 0.0359         | -3.327             |
| 76         | 4560     | 7.943       | 0.00755 | 30.2          | 0.0151    | 0.0349         | -3.356             |
| 80         | 4800     | 7.498       | 0.00800 | 32.0          | 0.0160    | 0.0340         | -3.382             |
| 85         | 5100     | 7.114       | 0.00843 | 33.7          | 0.0169    | 0.0331         | -3.407             |
| 90         | 5400     | 6.766       | 0.00887 | 35.5          | 0.0177    | 0.0323         | -3.434             |
| 95         | 5700     | 6.375       | 0.00941 | 37.7          | 0.0188    | 0.0312         | -3.468             |
| 100        | 6000     | 6.104       | 0.00983 | 39.3          | 0.0197    | 0.0303         | -3.495             |
| 105        | 6300     | 5.877       | 0.01021 | 40.8          | 0.0204    | 0.0296         | -3.521             |
| 110        | 6600     | 5.589       | 0.01073 | 42.9          | 0.0215    | 0.0285         | -3.557             |
| 115        | 6900     | 5.416       | 0.01108 | 44.3          | 0.0222    | 0.0278         | -3.581             |
| 120        | 7200     | 5.210       | 0.01152 | 46.1          | 0.0230    | 0.0270         | -3.613             |

First Trial– Background–[**5a** (0.025 mmol); 2-methylfuran( 0.25 mmol);  $\text{CDCl}_3$ (0.5 mL)]

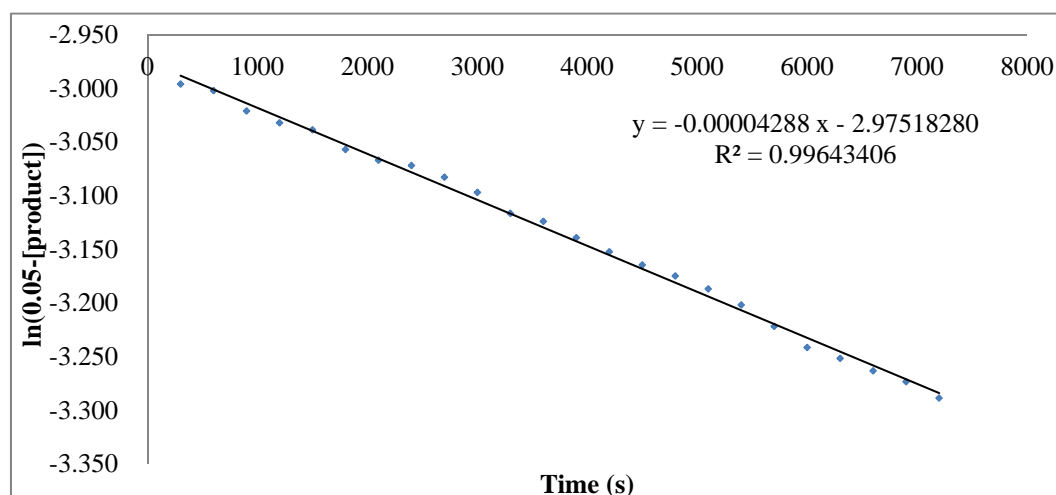

| Time (min) | Time (s) | Integration | mmol    | NMR Yield (%) | [product] | 0.05-[product] | ln(0.05-[product]) |
|------------|----------|-------------|---------|---------------|-----------|----------------|--------------------|
| 5          | 300      | 32149.684   | 0.00000 | 0.0           | 0.0000    | 0.0500         | -2.996             |
| 10         | 600      | 391.334     | 0.00015 | 0.6           | 0.0003    | 0.0497         | -3.002             |
| 15         | 900      | 96.300      | 0.00062 | 2.5           | 0.0012    | 0.0488         | -3.021             |
| 20         | 1200     | 67.580      | 0.00089 | 3.6           | 0.0018    | 0.0482         | -3.032             |
| 25         | 1500     | 57.306      | 0.00105 | 4.2           | 0.0021    | 0.0479         | -3.039             |
| 30         | 1800     | 40.436      | 0.00148 | 5.9           | 0.0030    | 0.0470         | -3.057             |
| 35         | 2100     | 34.956      | 0.00172 | 6.9           | 0.0034    | 0.0466         | -3.067             |
| 40         | 2400     | 32.764      | 0.00183 | 7.3           | 0.0037    | 0.0463         | -3.072             |
| 45         | 2700     | 28.844      | 0.00208 | 8.3           | 0.0042    | 0.0458         | -3.083             |
| 50         | 3000     | 24.967      | 0.00240 | 9.6           | 0.0048    | 0.0452         | -3.097             |
| 55         | 3300     | 21.106      | 0.00284 | 11.4          | 0.0057    | 0.0443         | -3.116             |
| 60         | 3600     | 19.957      | 0.00301 | 12.0          | 0.0060    | 0.0440         | -3.124             |
| 65         | 3900     | 17.979      | 0.00334 | 13.3          | 0.0067    | 0.0433         | -3.139             |
| 70         | 4200     | 16.574      | 0.00362 | 14.5          | 0.0072    | 0.0428         | -3.152             |
| 75         | 4500     | 15.463      | 0.00388 | 15.5          | 0.0078    | 0.0422         | -3.164             |
| 80         | 4800     | 14.648      | 0.00410 | 16.4          | 0.0082    | 0.0418         | -3.175             |
| 85         | 5100     | 13.793      | 0.00435 | 17.4          | 0.0087    | 0.0413         | -3.187             |
| 90         | 5400     | 12.888      | 0.00466 | 18.6          | 0.0093    | 0.0407         | -3.202             |
| 95         | 5700     | 11.867      | 0.00506 | 20.2          | 0.0101    | 0.0399         | -3.222             |
| 100        | 6000     | 11.016      | 0.00545 | 21.8          | 0.0109    | 0.0391         | -3.241             |
| 105        | 6300     | 10.634      | 0.00564 | 22.6          | 0.0113    | 0.0387         | -3.252             |
| 110        | 6600     | 10.226      | 0.00587 | 23.5          | 0.0117    | 0.0383         | -3.263             |
| 115        | 6900     | 9.898       | 0.00606 | 24.2          | 0.0121    | 0.0379         | -3.273             |
| 120        | 7200     | 9.452       | 0.00635 | 25.4          | 0.0127    | 0.0373         | -3.289             |

Second Trial– Background–[5a (0.025 mmol); 2-methylfuran( 0.25 mmol); CDCl<sub>3</sub>(0.5 mL)]

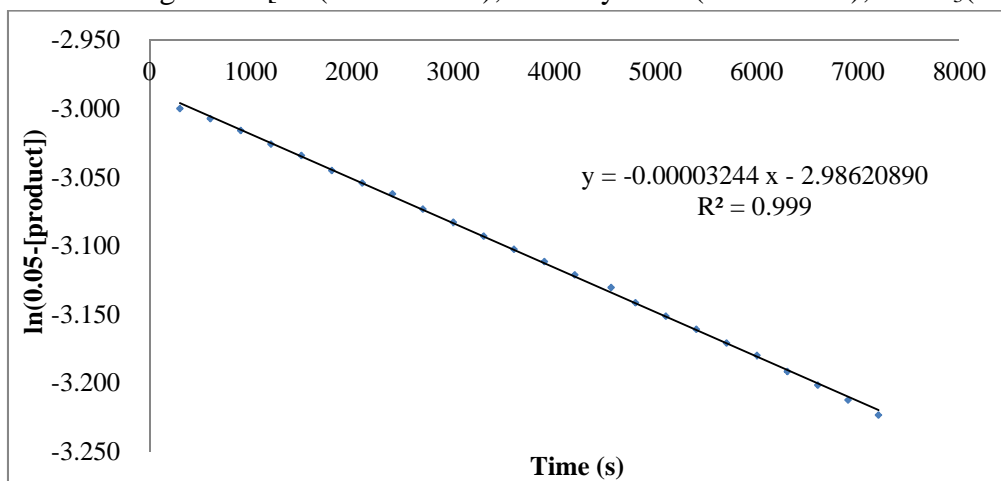

| Time (min) | Time (s) | Integration | mmol    | NMR Yield (%) | [product] | 0.05-[product] | ln(0.05-[product]) |
|------------|----------|-------------|---------|---------------|-----------|----------------|--------------------|
| 5          | 300      | 575.814     | 0.00010 | 0.4           | 0.0002    | 0.0498         | -3.000             |
| 10         | 600      | 210.331     | 0.00029 | 1.1           | 0.0006    | 0.0494         | -3.007             |
| 15         | 900      | 120.639     | 0.00050 | 2.0           | 0.0010    | 0.0490         | -3.016             |
| 20         | 1200     | 81.136      | 0.00074 | 3.0           | 0.0015    | 0.0485         | -3.026             |
| 25         | 1500     | 63.773      | 0.00094 | 3.8           | 0.0019    | 0.0481         | -3.034             |
| 30         | 1800     | 49.850      | 0.00120 | 4.8           | 0.0024    | 0.0476         | -3.045             |
| 35         | 2100     | 42.290      | 0.00142 | 5.7           | 0.0028    | 0.0472         | -3.054             |
| 40         | 2400     | 37.384      | 0.00160 | 6.4           | 0.0032    | 0.0468         | -3.062             |
| 45         | 2700     | 32.203      | 0.00186 | 7.5           | 0.0037    | 0.0463         | -3.073             |
| 50         | 3000     | 28.821      | 0.00208 | 8.3           | 0.0042    | 0.0458         | -3.083             |
| 55         | 3300     | 25.938      | 0.00231 | 9.3           | 0.0046    | 0.0454         | -3.093             |
| 60         | 3600     | 23.709      | 0.00253 | 10.1          | 0.0051    | 0.0449         | -3.102             |
| 65         | 3900     | 21.975      | 0.00273 | 10.9          | 0.0055    | 0.0445         | -3.111             |
| 70         | 4200     | 20.373      | 0.00295 | 11.8          | 0.0059    | 0.0441         | -3.121             |
| 76         | 4560     | 19.067      | 0.00315 | 12.6          | 0.0063    | 0.0437         | -3.130             |
| 80         | 4800     | 17.712      | 0.00339 | 13.6          | 0.0068    | 0.0432         | -3.141             |
| 85         | 5100     | 16.676      | 0.00360 | 14.4          | 0.0072    | 0.0428         | -3.151             |
| 90         | 5400     | 15.773      | 0.00380 | 15.2          | 0.0076    | 0.0424         | -3.161             |
| 95         | 5700     | 14.941      | 0.00402 | 16.1          | 0.0080    | 0.0420         | -3.171             |
| 100        | 6000     | 14.278      | 0.00420 | 16.8          | 0.0084    | 0.0416         | -3.180             |
| 105        | 6300     | 13.494      | 0.00445 | 17.8          | 0.0089    | 0.0411         | -3.192             |
| 110        | 6600     | 12.907      | 0.00465 | 18.6          | 0.0093    | 0.0407         | -3.201             |
| 115        | 6900     | 12.324      | 0.00487 | 19.5          | 0.0097    | 0.0403         | -3.212             |
| 120        | 7200     | 11.792      | 0.00509 | 20.4          | 0.0102    | 0.0398         | -3.223             |

First Trial-[**5a** (0.025 mmol); 2-methylfuran( 0.25 mmol); **1c** (0.005 mmol); CDCl<sub>3</sub>(0.5 mL)]

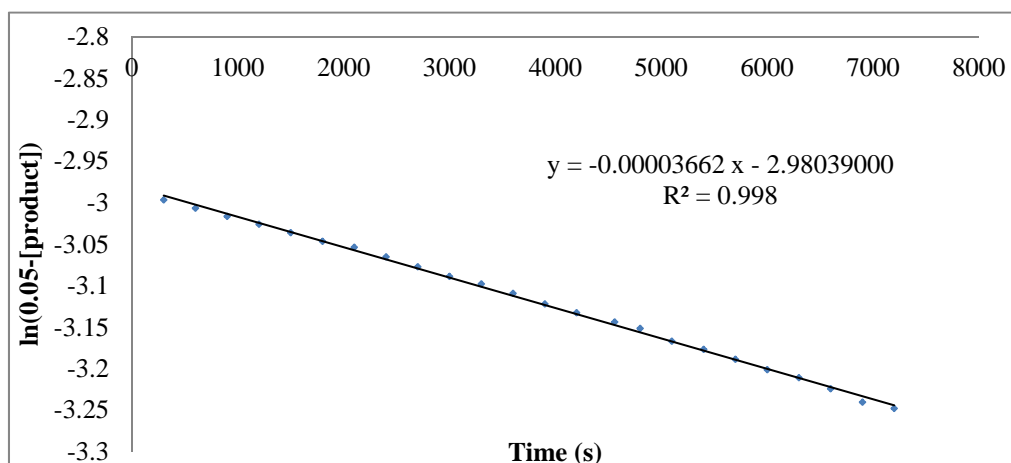

| Time (min) | Time (s) | Integration | mmol    | NMR Yield (%) | [product] | 0.05-[product] | ln(0.05-[product]) |
|------------|----------|-------------|---------|---------------|-----------|----------------|--------------------|
| 5          | 300      | 2814.067    | 0.00002 | 0.1           | 0.0000    | 0.0500         | -2.997             |
| 10         | 600      | 218.620     | 0.00027 | 1.1           | 0.0005    | 0.0495         | -3.007             |
| 15         | 900      | 116.964     | 0.00051 | 2.1           | 0.0010    | 0.0490         | -3.016             |
| 20         | 1200     | 80.702      | 0.00074 | 3.0           | 0.0015    | 0.0485         | -3.026             |
| 25         | 1500     | 60.503      | 0.00099 | 4.0           | 0.0020    | 0.0480         | -3.036             |
| 30         | 1800     | 48.430      | 0.00124 | 5.0           | 0.0025    | 0.0475         | -3.047             |
| 35         | 2100     | 42.585      | 0.00141 | 5.6           | 0.0028    | 0.0472         | -3.054             |
| 40         | 2400     | 35.740      | 0.00168 | 6.7           | 0.0034    | 0.0466         | -3.065             |
| 45         | 2700     | 30.681      | 0.00196 | 7.8           | 0.0039    | 0.0461         | -3.077             |
| 50         | 3000     | 27.006      | 0.00222 | 8.9           | 0.0044    | 0.0456         | -3.089             |
| 55         | 3300     | 24.711      | 0.00243 | 9.7           | 0.0049    | 0.0451         | -3.098             |
| 60         | 3600     | 22.356      | 0.00268 | 10.7          | 0.0054    | 0.0446         | -3.109             |
| 65         | 3900     | 20.226      | 0.00297 | 11.9          | 0.0059    | 0.0441         | -3.122             |
| 70         | 4200     | 18.771      | 0.00320 | 12.8          | 0.0064    | 0.0436         | -3.133             |
| 76         | 4560     | 17.451      | 0.00344 | 13.8          | 0.0069    | 0.0431         | -3.144             |
| 80         | 4800     | 16.638      | 0.00361 | 14.4          | 0.0072    | 0.0428         | -3.152             |
| 85         | 5100     | 15.251      | 0.00393 | 15.7          | 0.0079    | 0.0421         | -3.167             |
| 90         | 5400     | 14.492      | 0.00414 | 16.6          | 0.0083    | 0.0417         | -3.177             |
| 95         | 5700     | 13.674      | 0.00439 | 17.6          | 0.0088    | 0.0412         | -3.189             |
| 100        | 6000     | 12.918      | 0.00464 | 18.6          | 0.0093    | 0.0407         | -3.201             |
| 105        | 6300     | 12.403      | 0.00484 | 19.4          | 0.0097    | 0.0403         | -3.211             |
| 110        | 6600     | 11.748      | 0.00511 | 20.4          | 0.0102    | 0.0398         | -3.224             |
| 115        | 6900     | 11.057      | 0.00543 | 21.7          | 0.0109    | 0.0391         | -3.240             |
| 120        | 7200     | 10.769      | 0.00557 | 22.3          | 0.0111    | 0.0389         | -3.248             |



First Trial-[**5a** (0.025 mmol); 2-methylfuran( 0.25 mmol); **3a** (0.005 mmol); CDCl<sub>3</sub>(0.5 mL)]

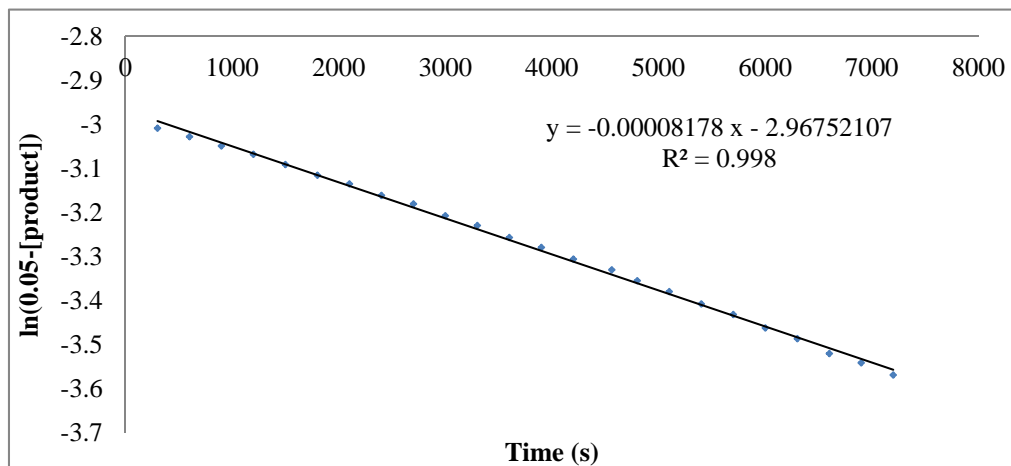

| Time (min) | Time (s) | Integration | mmol    | NMR Yield (%) | [product] | 0.05-[product] | ln(0.05-[product]) |
|------------|----------|-------------|---------|---------------|-----------|----------------|--------------------|
| 5          | 300      | 194.764     | 0.00031 | 1.2           | 0.0006    | 0.0494         | -3.008             |
| 10         | 600      | 76.885      | 0.00078 | 3.1           | 0.0016    | 0.0484         | -3.027             |
| 15         | 900      | 46.615      | 0.00129 | 5.1           | 0.0026    | 0.0474         | -3.049             |
| 20         | 1200     | 34.786      | 0.00172 | 6.9           | 0.0034    | 0.0466         | -3.067             |
| 25         | 1500     | 26.536      | 0.00226 | 9.0           | 0.0045    | 0.0455         | -3.091             |
| 30         | 1800     | 21.372      | 0.00281 | 11.2          | 0.0056    | 0.0444         | -3.115             |
| 35         | 2100     | 18.515      | 0.00324 | 13.0          | 0.0065    | 0.0435         | -3.135             |
| 40         | 2400     | 15.788      | 0.00380 | 15.2          | 0.0076    | 0.0424         | -3.161             |
| 45         | 2700     | 14.266      | 0.00421 | 16.8          | 0.0084    | 0.0416         | -3.180             |
| 50         | 3000     | 12.618      | 0.00475 | 19.0          | 0.0095    | 0.0405         | -3.207             |
| 55         | 3300     | 11.541      | 0.00520 | 20.8          | 0.0104    | 0.0396         | -3.229             |
| 60         | 3600     | 10.459      | 0.00574 | 22.9          | 0.0115    | 0.0385         | -3.256             |
| 65         | 3900     | 9.732       | 0.00617 | 24.7          | 0.0123    | 0.0377         | -3.279             |
| 70         | 4200     | 9.013       | 0.00666 | 26.6          | 0.0133    | 0.0367         | -3.305             |
| 76         | 4560     | 8.457       | 0.00709 | 28.4          | 0.0142    | 0.0358         | -3.330             |
| 80         | 4800     | 7.964       | 0.00753 | 30.1          | 0.0151    | 0.0349         | -3.354             |
| 85         | 5100     | 7.536       | 0.00796 | 31.8          | 0.0159    | 0.0341         | -3.379             |
| 90         | 5400     | 7.118       | 0.00843 | 33.7          | 0.0169    | 0.0331         | -3.407             |
| 95         | 5700     | 6.799       | 0.00882 | 35.3          | 0.0176    | 0.0324         | -3.431             |
| 100        | 6000     | 6.446       | 0.00931 | 37.2          | 0.0186    | 0.0314         | -3.461             |
| 105        | 6300     | 6.194       | 0.00969 | 38.7          | 0.0194    | 0.0306         | -3.486             |
| 110        | 6600     | 5.885       | 0.01020 | 40.8          | 0.0204    | 0.0296         | -3.520             |
| 115        | 6900     | 5.714       | 0.01050 | 42.0          | 0.0210    | 0.0290         | -3.541             |
| 120        | 7200     | 5.505       | 0.01090 | 43.6          | 0.0218    | 0.0282         | -3.568             |

**UV / Vis. Titration Binding Study of Benzylidene Barbiturate Chromophore**

## *with Amide-Based HB-DAD Organocatalysts*

Barbiturate **9** was synthesized and characterized according to literature reports.<sup>[2-3]</sup>

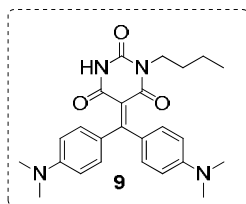

### **(A) Preparation of Stock Solution of 9**

$2 \times 10^{-4}$  M ( $2 \times 10^{-2}$  mmol of barbiturate **9** in 100.0 mL of  $\text{CH}_2\text{Cl}_2$ )

### **(B) Preparation of Stock Solution of HB-DAD Organocatalysts**

$9.67 \times 10^{-3}$  M ( $9.67 \times 10^{-2}$  mmol of HB-DAD organocatalysts in 10.0 mL of  $\text{CH}_2\text{Cl}_2$ )

### **(C) Preparation of Samples of HB-DAD Organocatalysts and Barbiturate 9 Mixture<sup>[3]</sup>**

Ten graduated flasks (5 mL) were treated with 0.5 mL of stock solution of barbiturate **9** (final concentration:  $2 \times 10^{-5}$  M) and 0, 20, 40, 80, 160, 320, 640, 1260, 2560, 3000  $\mu\text{L}$  (corresponding to a 2-290 fold excess) of a stock solution of HB-DAD organocatalysts, and filled up to 5 mL with  $\text{CH}_2\text{Cl}_2$ . The change in absorbance was monitored and evaluated by linearized Scatchard plot (S1). The given values of  $K_A$  were the average of two runs.

### **(D) Linearized Scatchard Plot**

$$\frac{\Delta A}{d \cdot [R]} = - \frac{\Delta A \cdot K}{d} + K \cdot \Delta \epsilon \cdot [S] \quad (\text{S1})$$

[S]: Concentration of benzylidene barbiturate chromophore

[R]: Concentration of amide-based HB-DAD organocatalysts

$K$ : Binding Constant

$\Delta A$ : Change of absorbance

$\Delta \epsilon$ : Molar absorptivity

In Scatchard Plot

$K = -$  (slope)

$\Delta \epsilon =$  (x-intercept) / [S]

**Table S7.** Binding constant determinations with UV / Vis. titration method

| Entry | HB-DAD Organocatalysts                                                                         | 1 <sup>st</sup> Trial | 2 <sup>nd</sup> Trial $K_A$ | Averaged $K_A$     |
|-------|------------------------------------------------------------------------------------------------|-----------------------|-----------------------------|--------------------|
|       |                                                                                                | $K_A$ ( $M^{-1}$ )    | ( $M^{-1}$ )                | ( $M^{-1}$ )       |
| 1     | 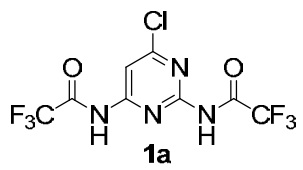<br><b>1a</b> | 8575                  | 9298                        | 8936 ( $\pm$ 723)  |
| 2     | <br><b>1b</b> | 6264                  | 6631                        | 6447 ( $\pm$ 380)  |
| 3     | <br><b>2a</b> | 7557                  | 7937                        | 7747 ( $\pm$ 367)  |
| 4     | <br><b>2b</b> | 5404                  | 4385                        | 4895 ( $\pm$ 1019) |

**Table S8.** The rate constants and binding constants of HB-DAD organocatalysts

| Entry | Catalysts | $K_A$ ( $M^{-1}$ ) | $\ln K_A$ | $k_{rel}$ | $\ln k_{rel}$ |
|-------|-----------|--------------------|-----------|-----------|---------------|
| 1     | <b>1a</b> | 8936               | 9.10      | 2.94      | 1.08          |
| 2     | <b>1b</b> | 6447               | 8.96      | 1.79      | 0.58          |
| 3     | <b>2a</b> | 7747               | 8.77      | 2.24      | 0.80          |
| 4     | <b>2b</b> | 4895               | 8.50      | 1.39      | 0.33          |

### Reference of UV / Vis. Titration Experiment

[2] a) K. A. Connors, *Binding Constants: The Measurement of Molecular Complex Stability*, Wiley-VCH, Weinheim, 1987; b) C. W. Davies, *Ion association*, Butterworths, Washington, 1962, Ch. 4.

[3] M. Bauer, S. Spange, *Angew. Chem. Int. Ed.* 2011, **50**, 9727.

First Trial of Binding Constant of **1a** with **9**

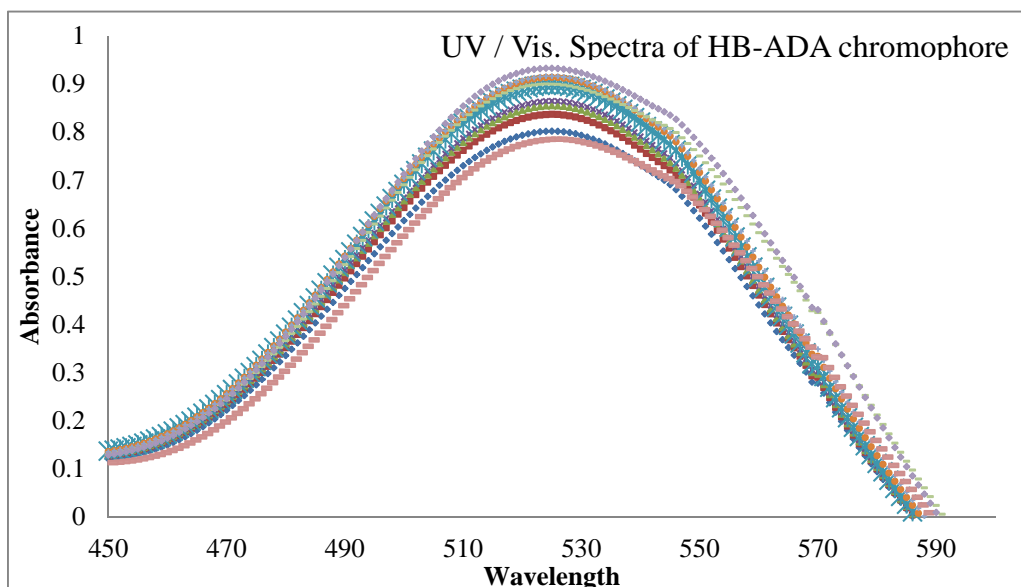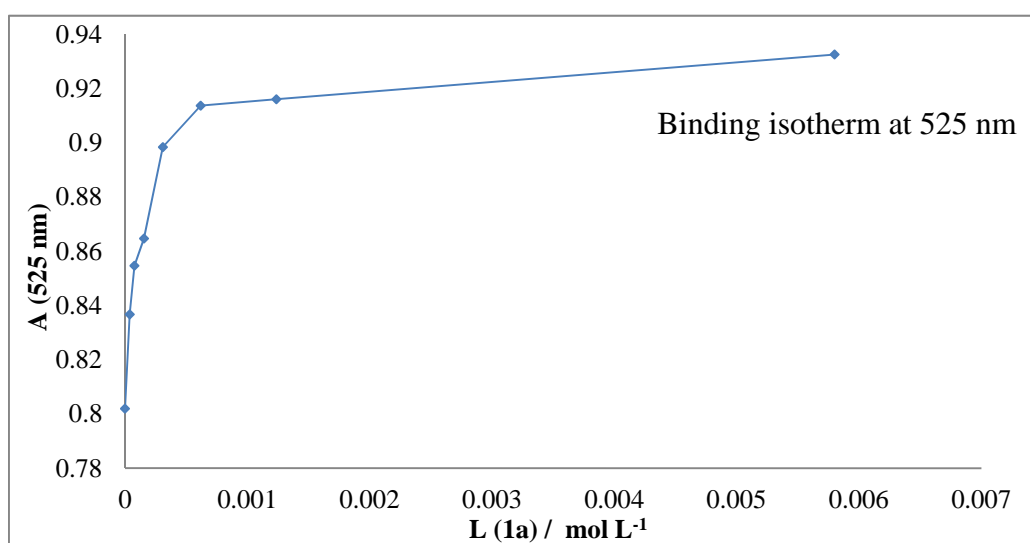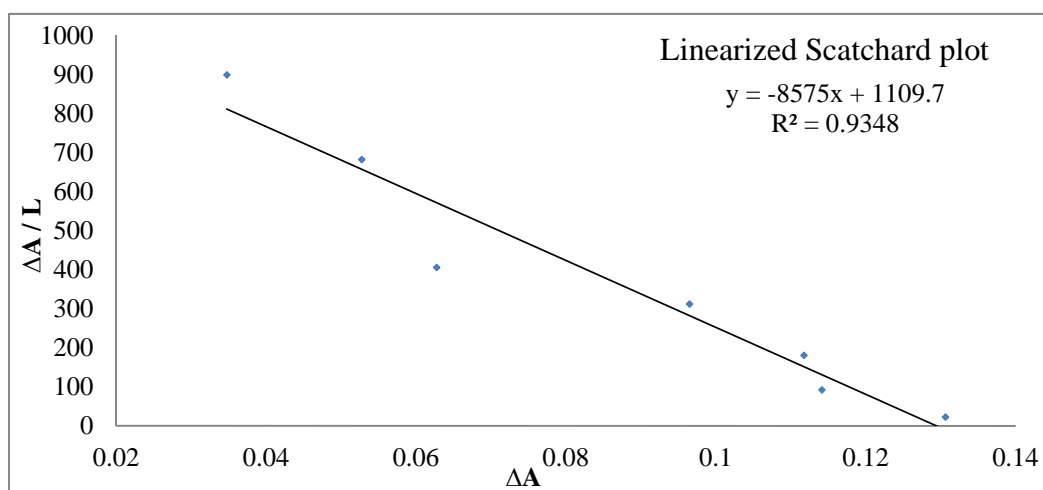

Second Trial of Binding Constant of **1a** with **9**

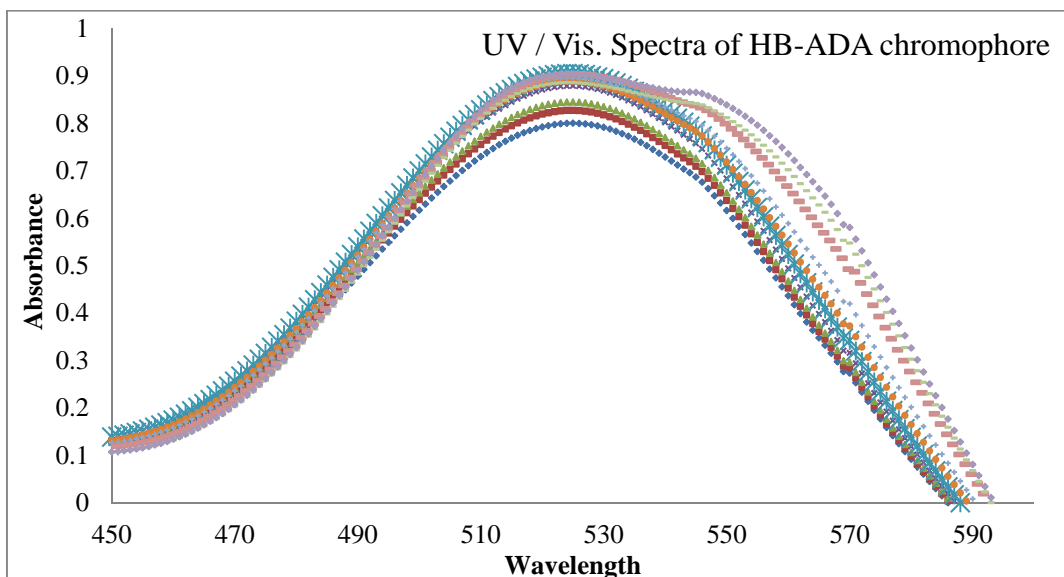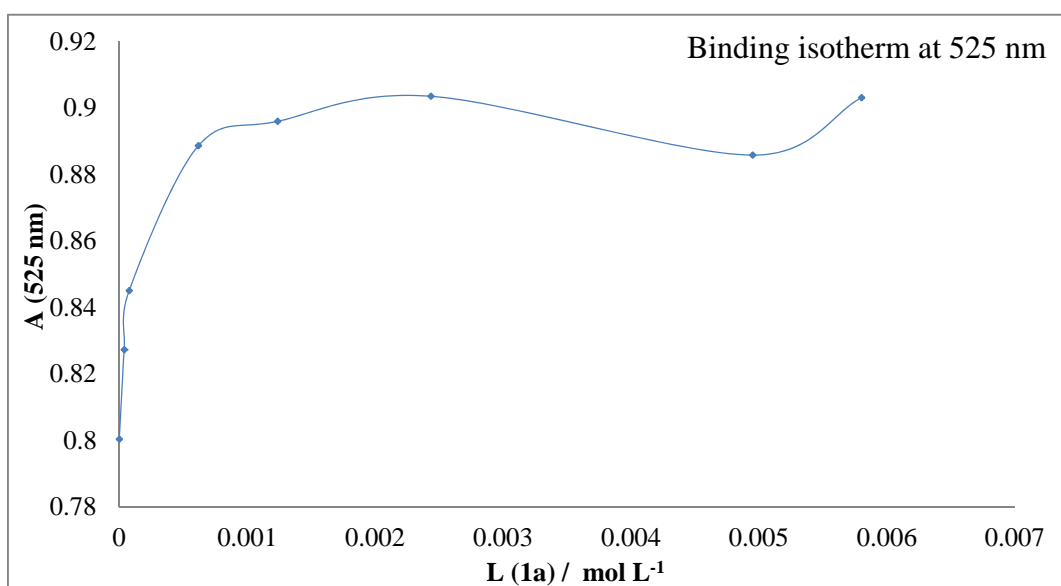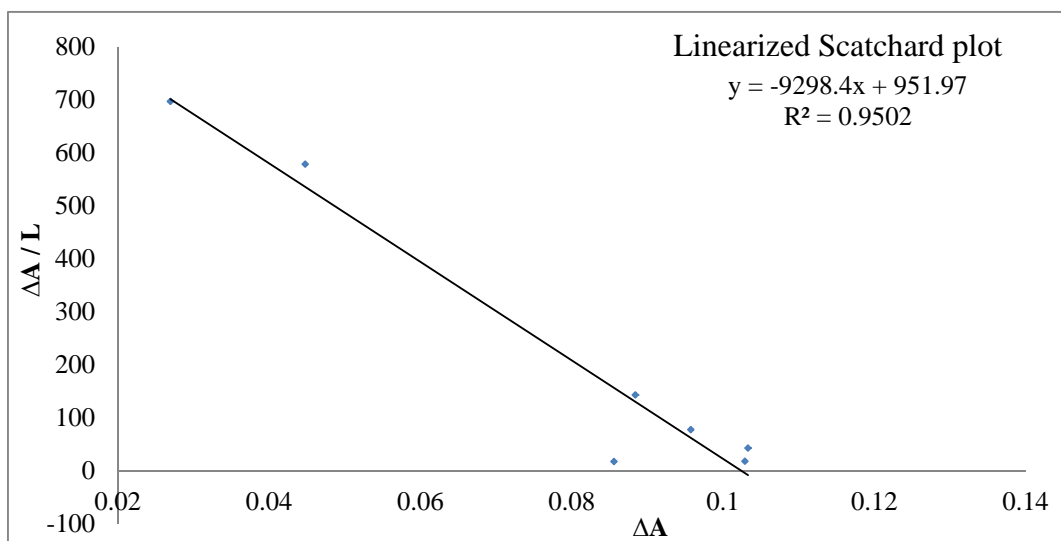

First Trial of Binding Constant of **1b** with **9**

UV / Vis. Spectra of HB-ADA chromophore

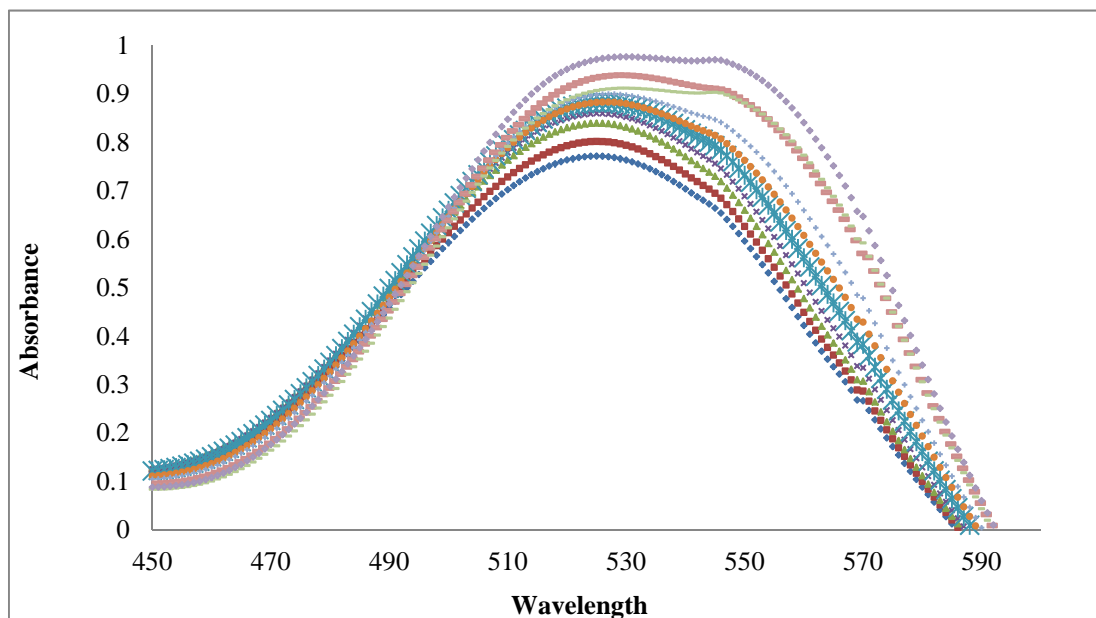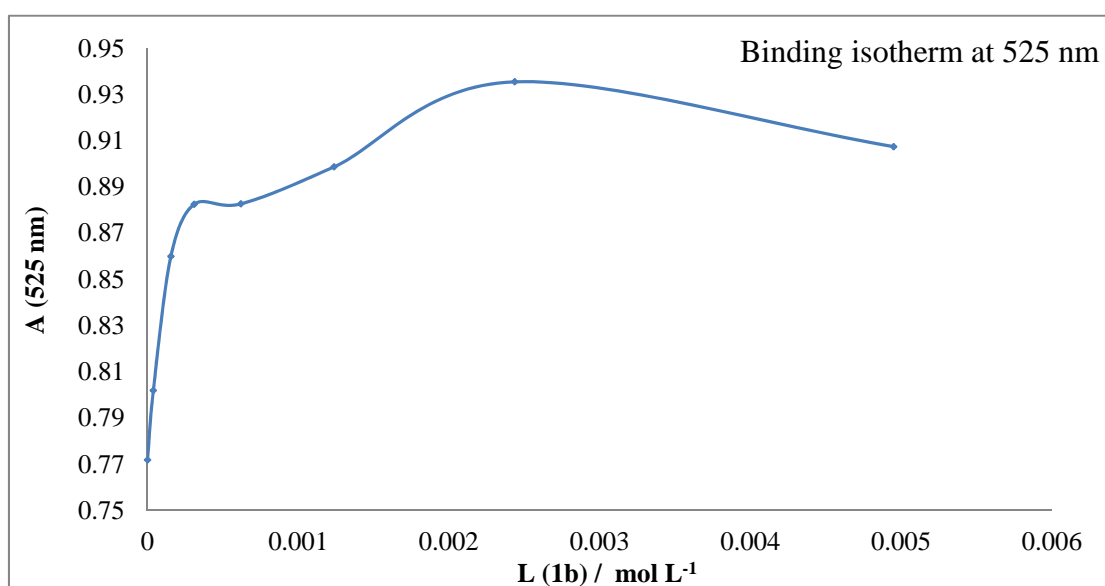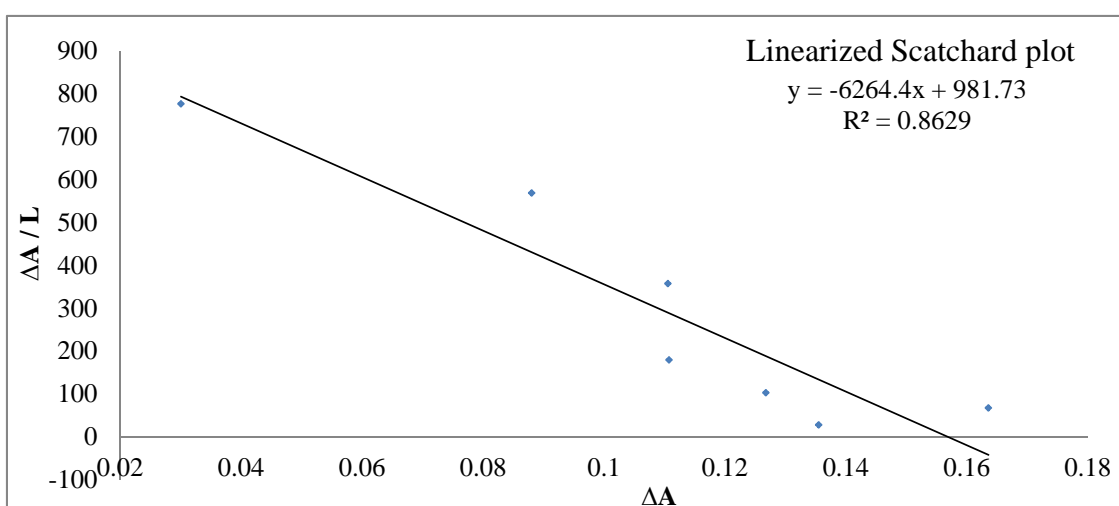

Second Trial of Binding Constant of **1b** with **9**

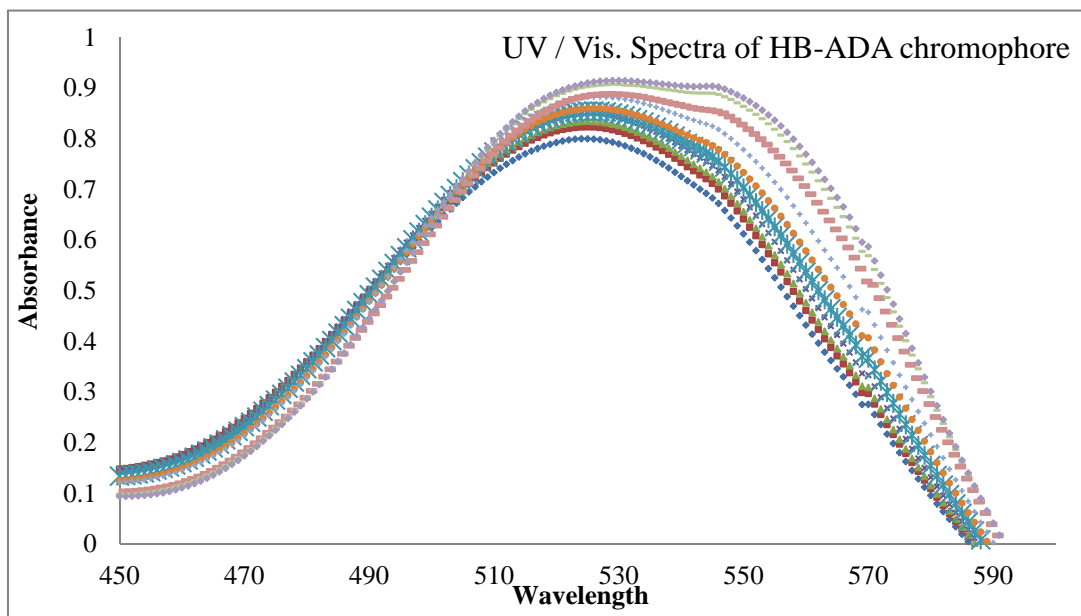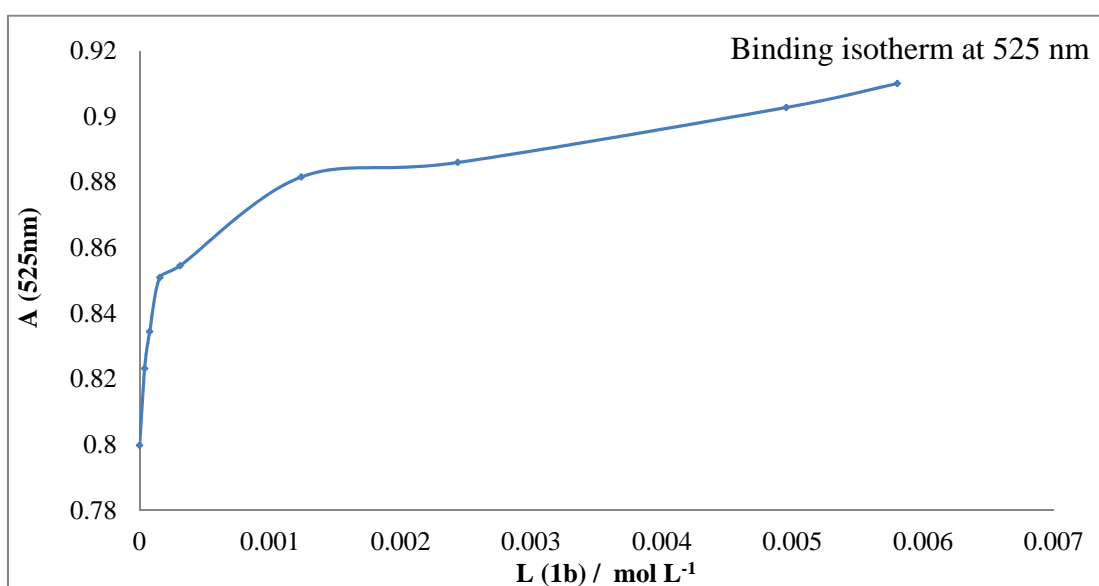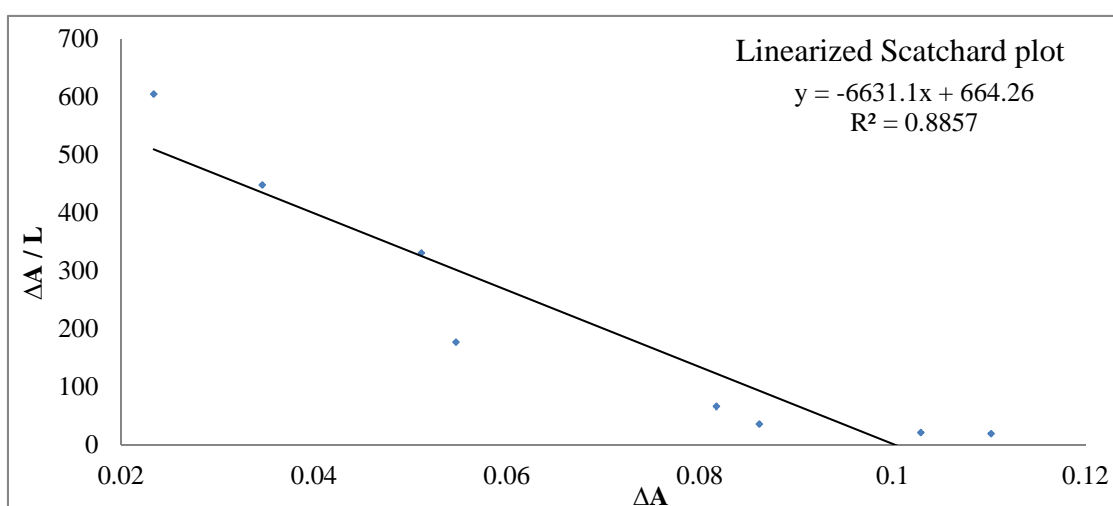

First Trial of Binding Constant of **2a** with **9**

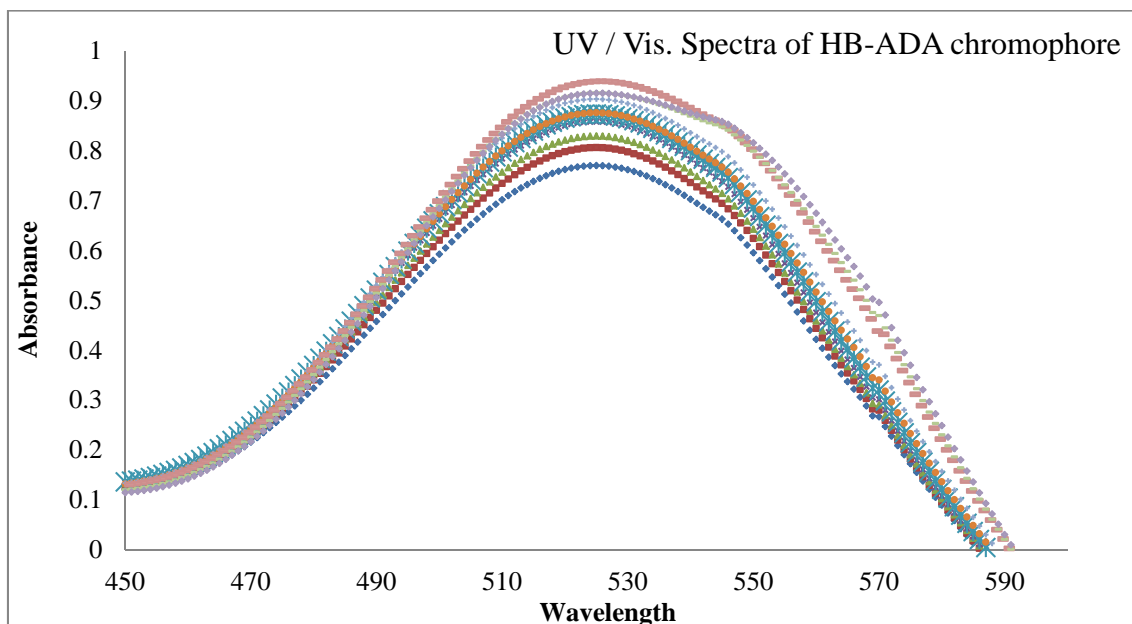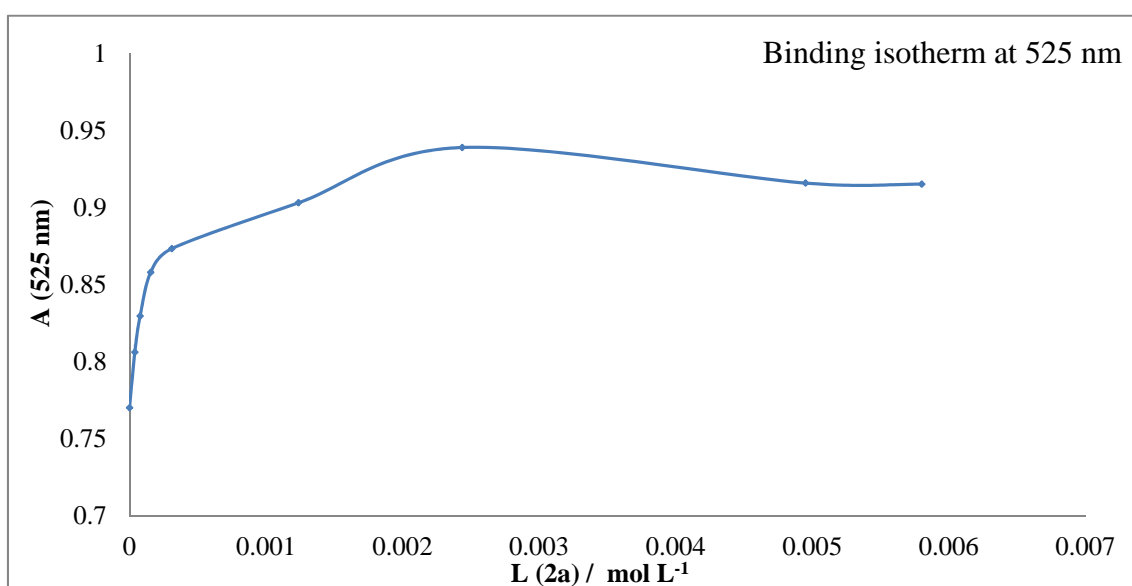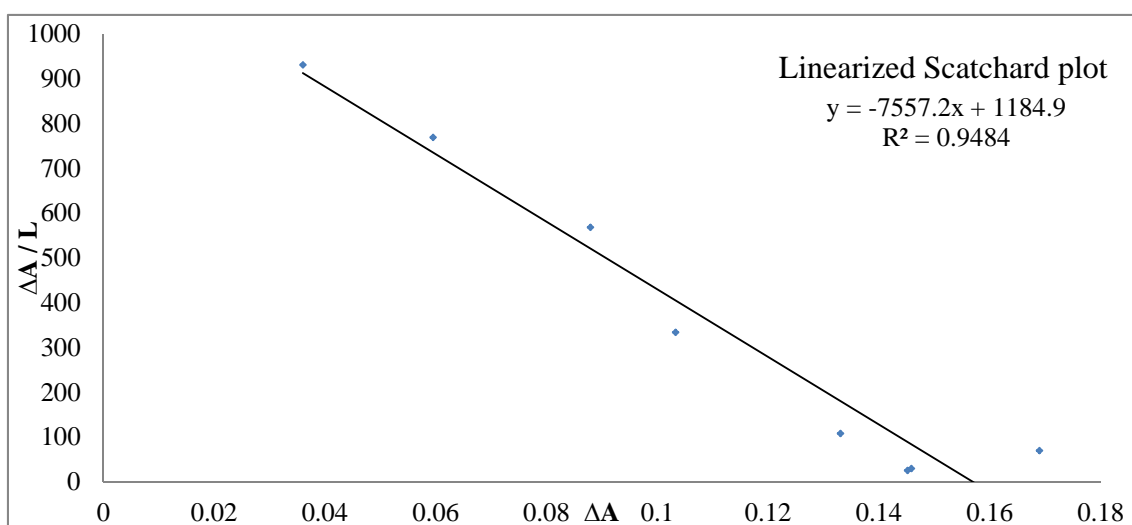

Second Trial of Binding Constant of **2a** with **9**



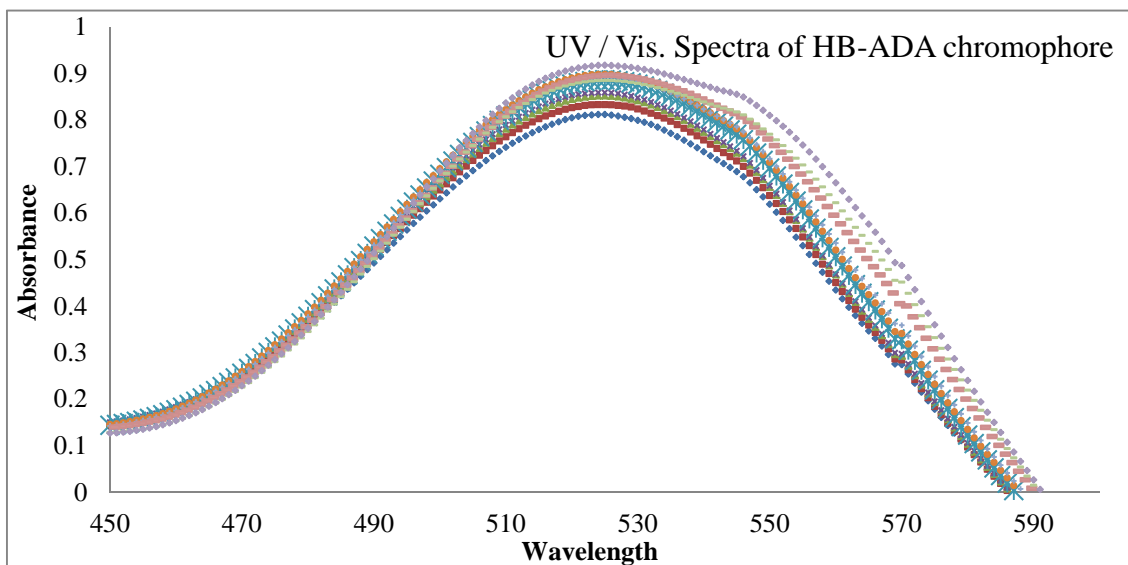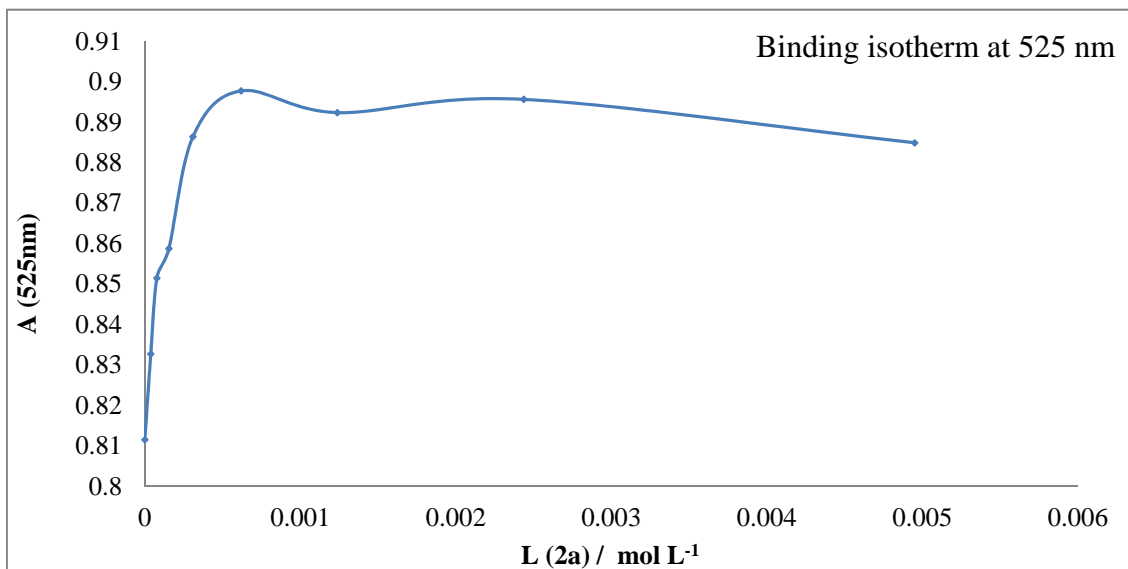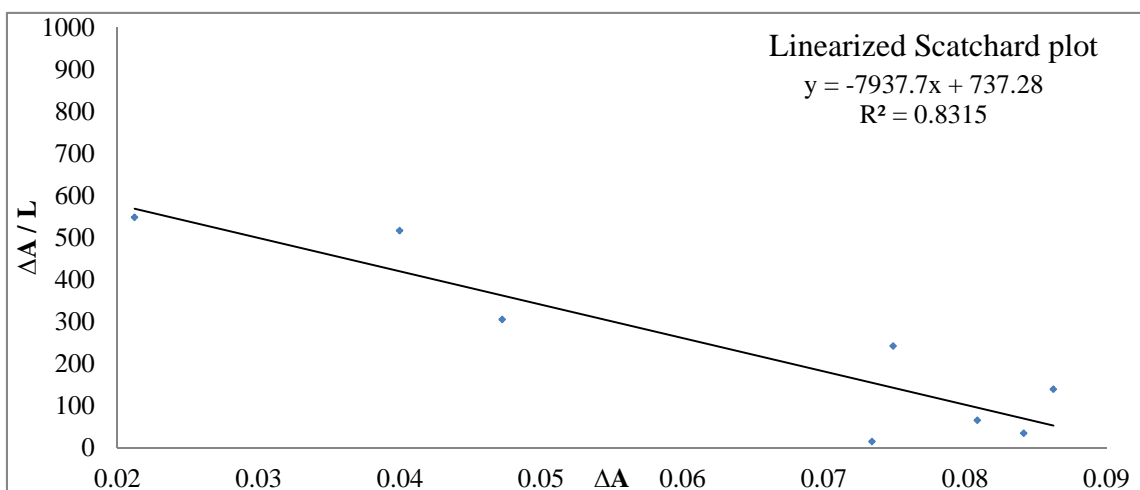

First Trial of Binding Constant of **2b** with **9**

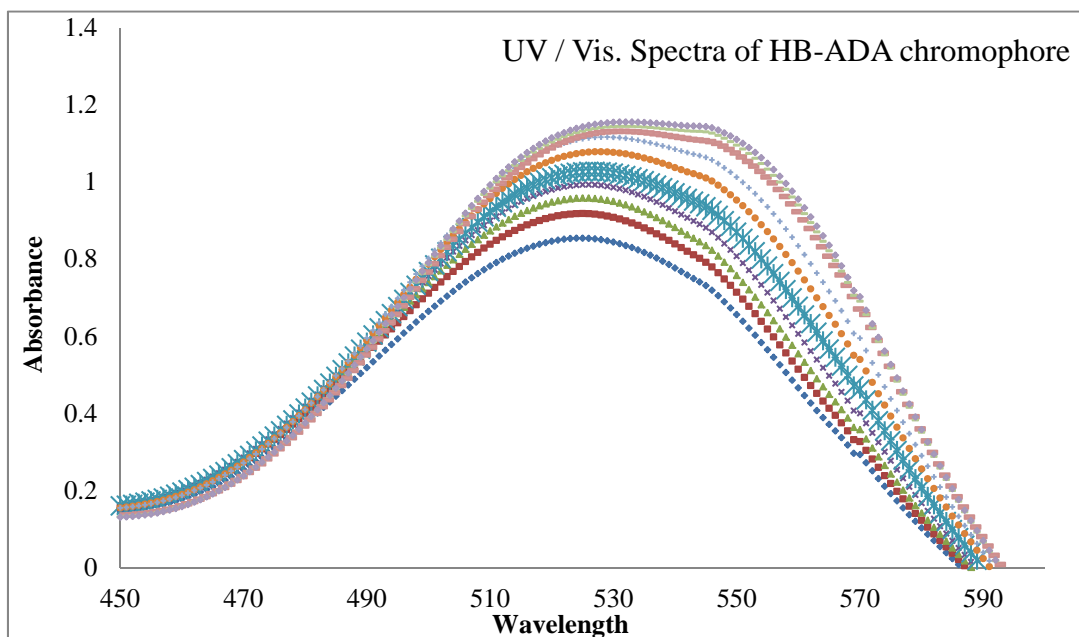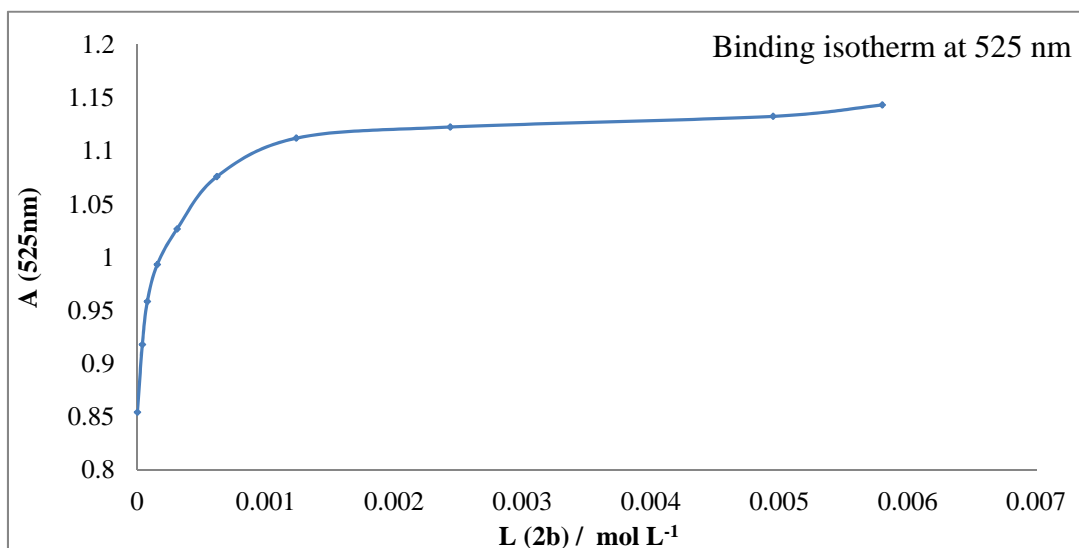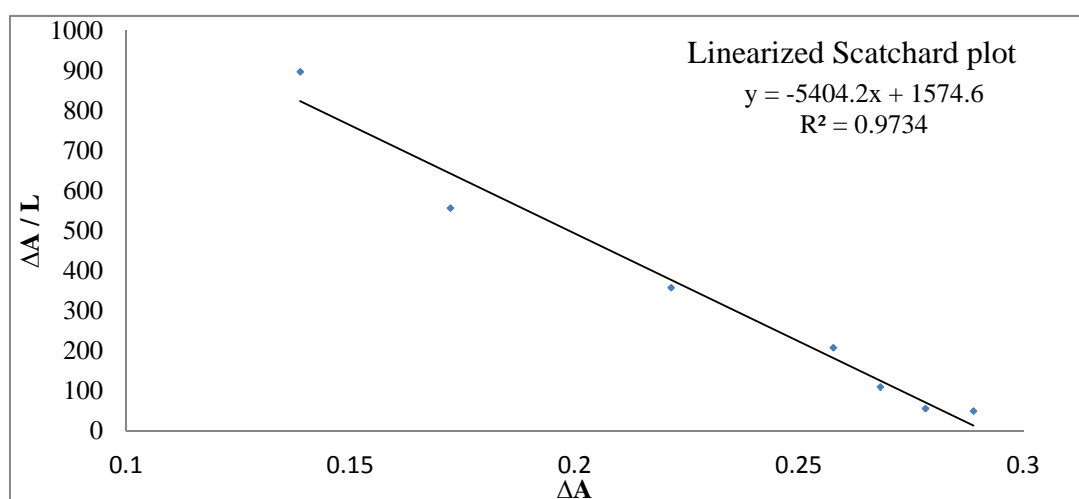

Second Trial of Binding Constant of **2b** with **9**

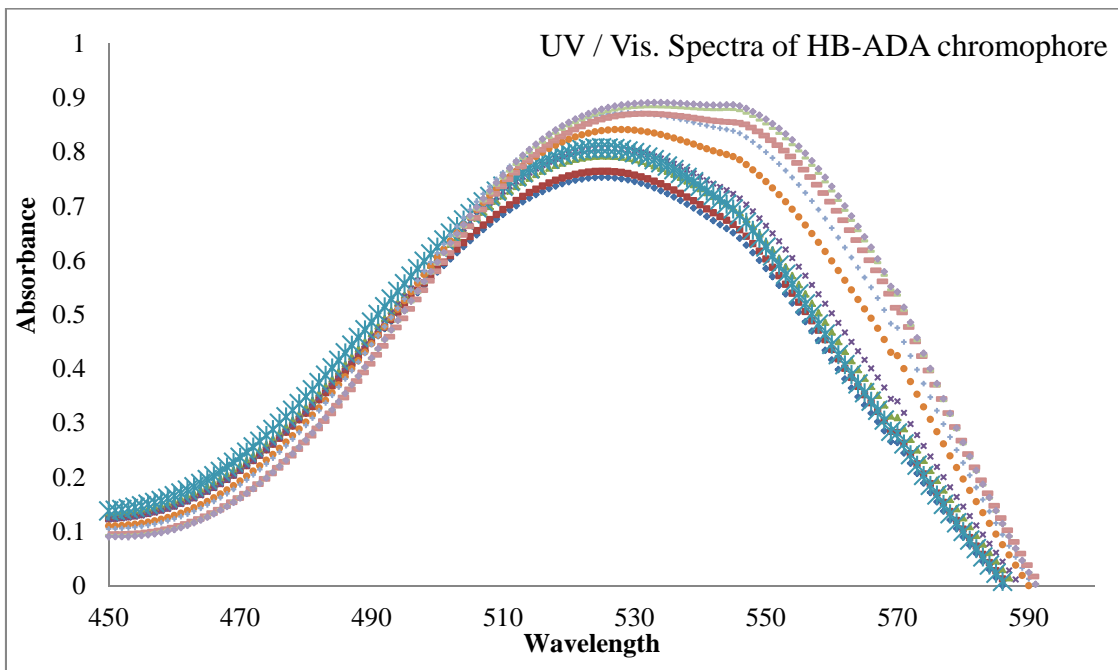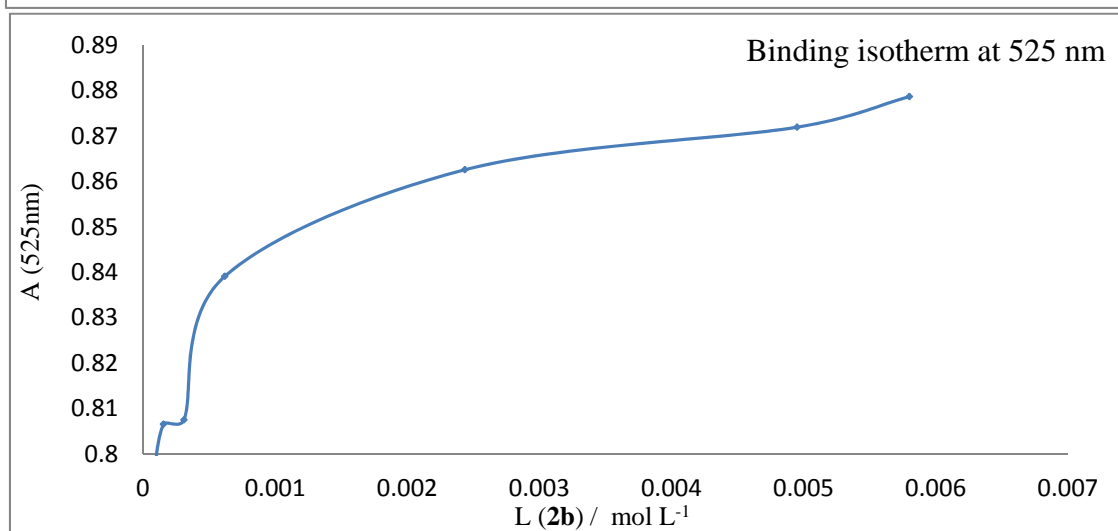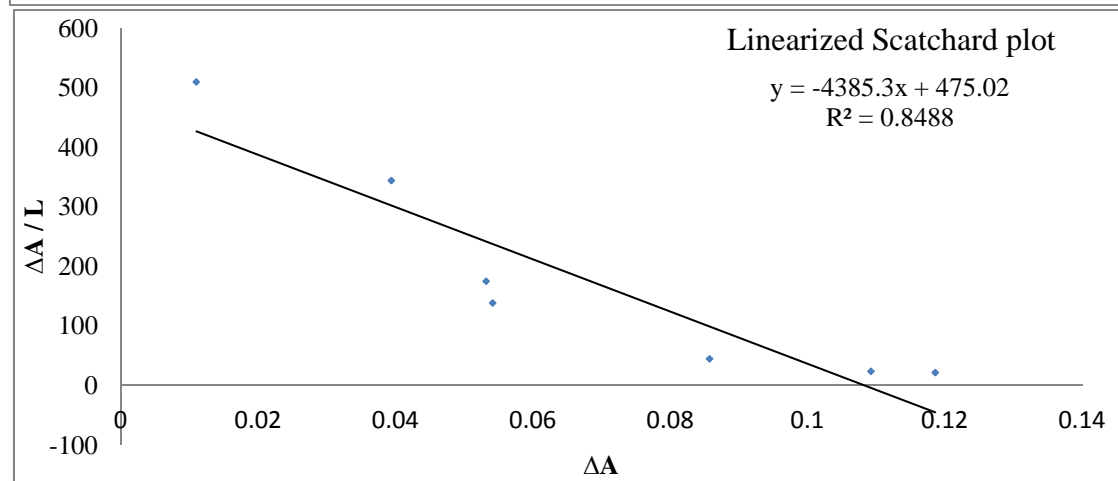

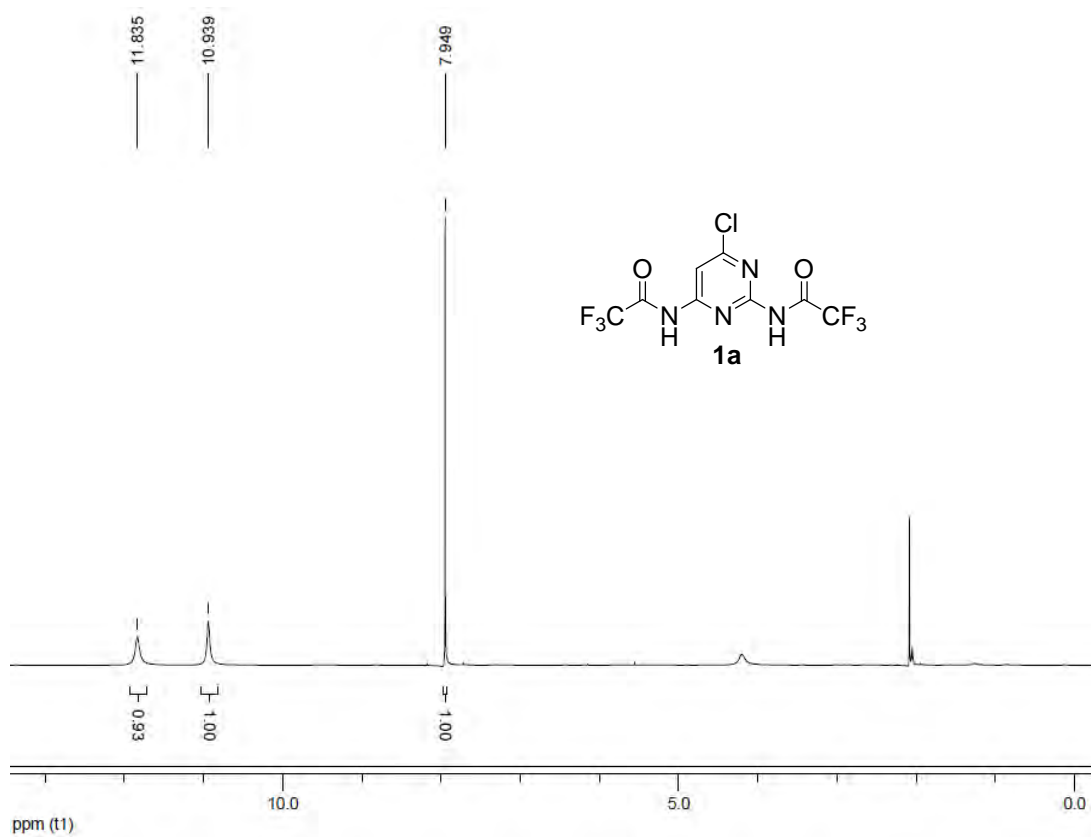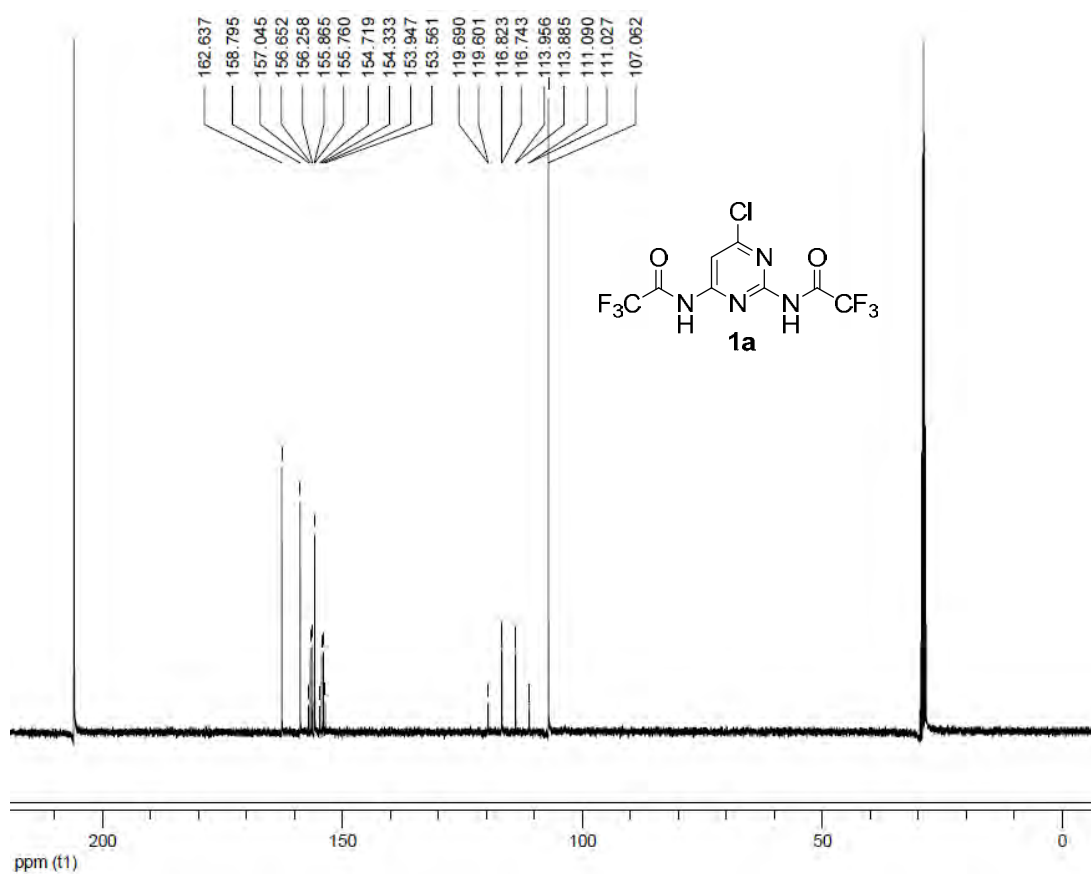

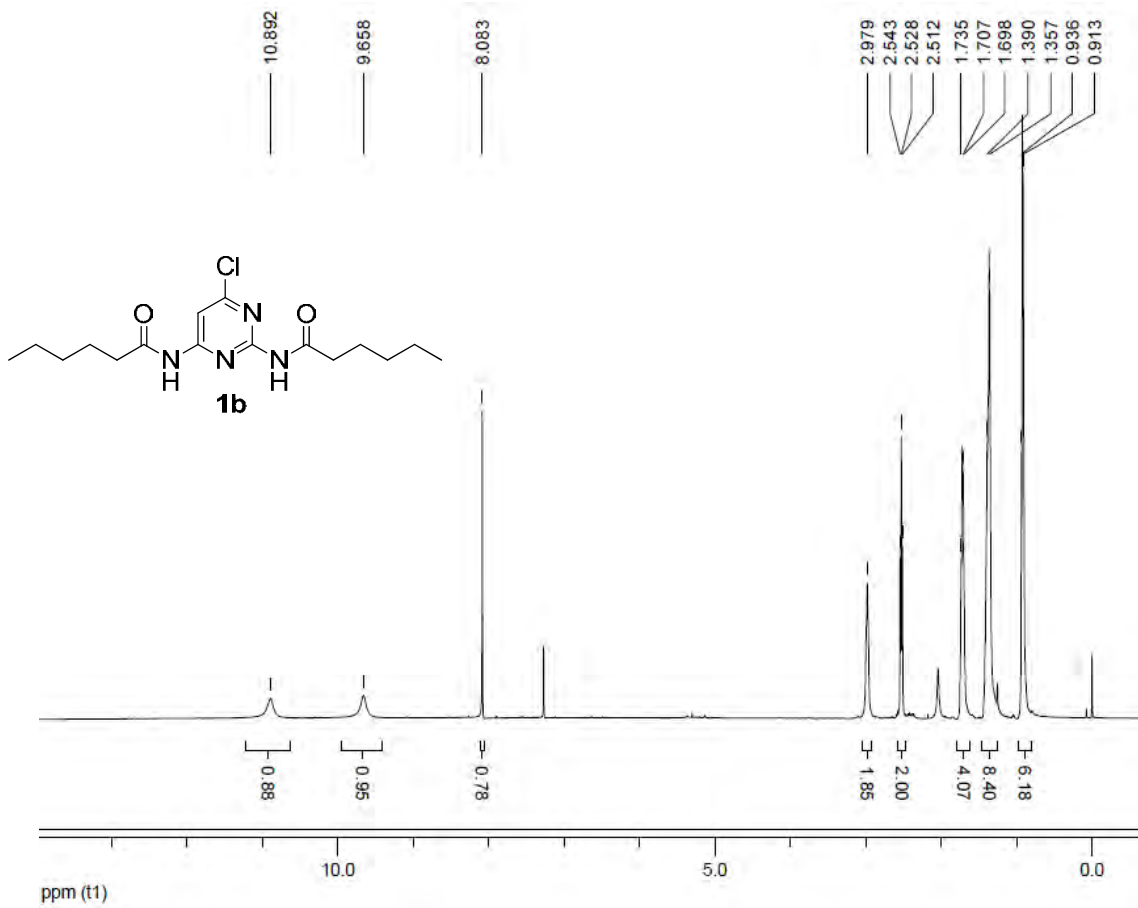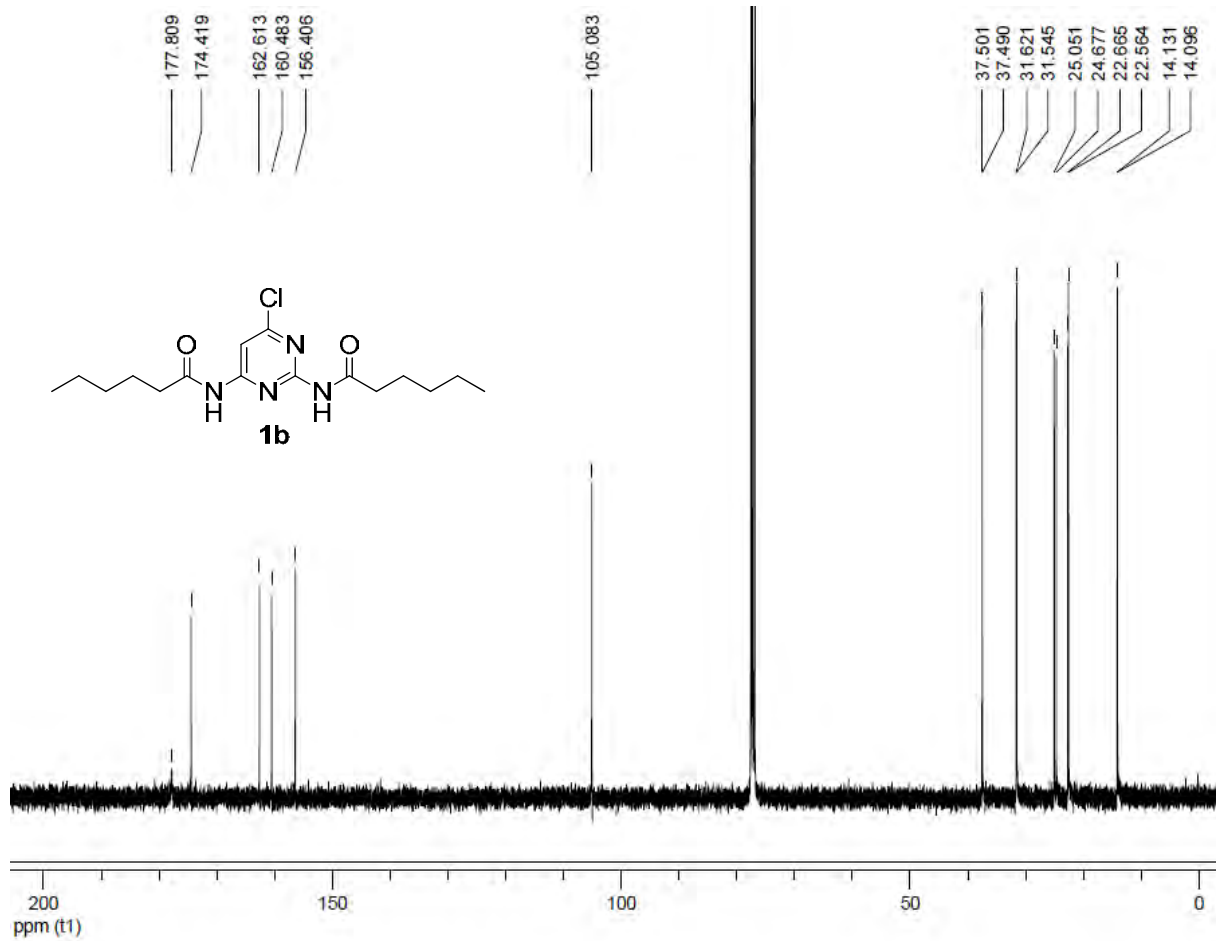

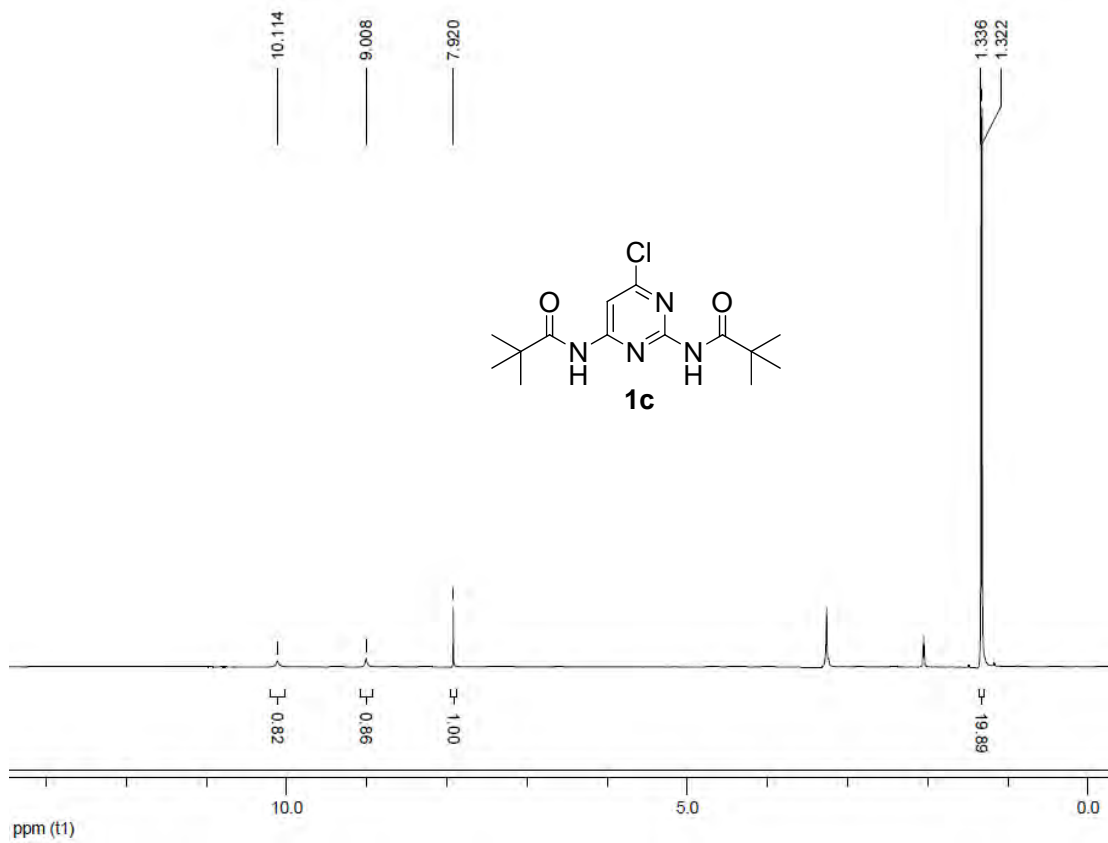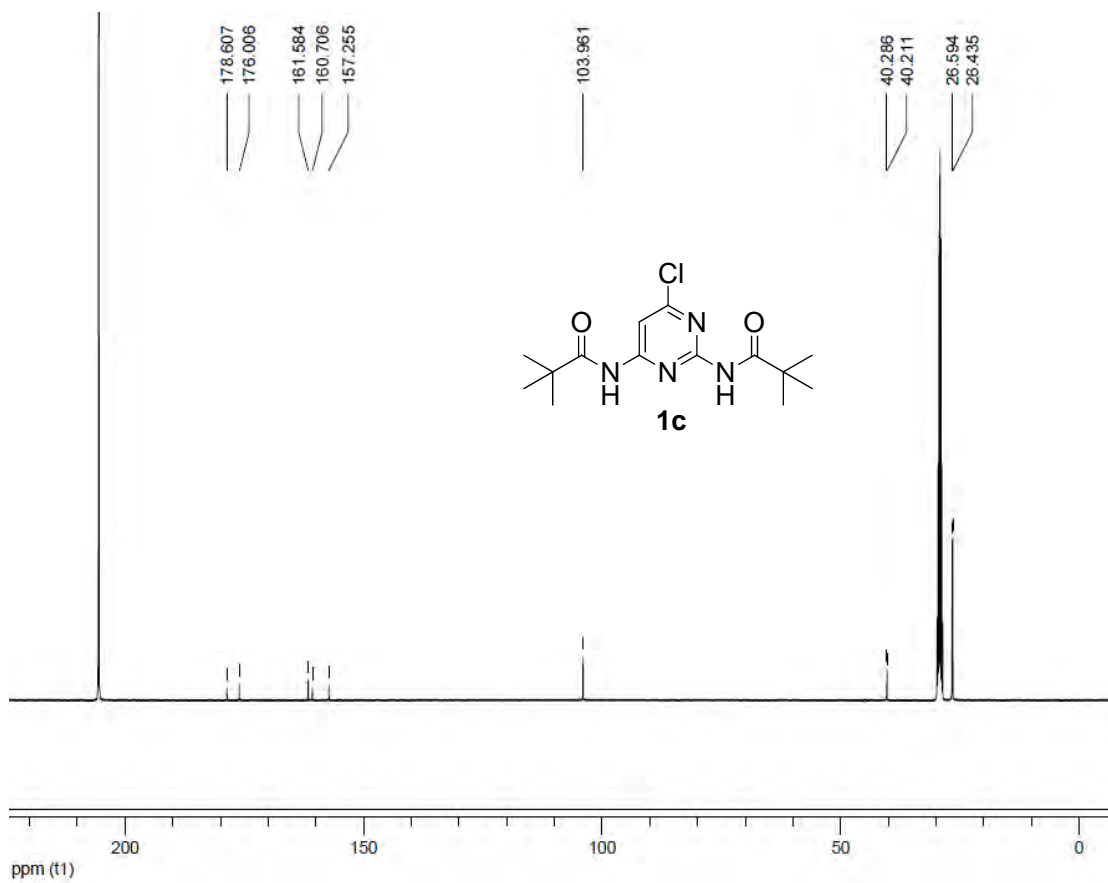

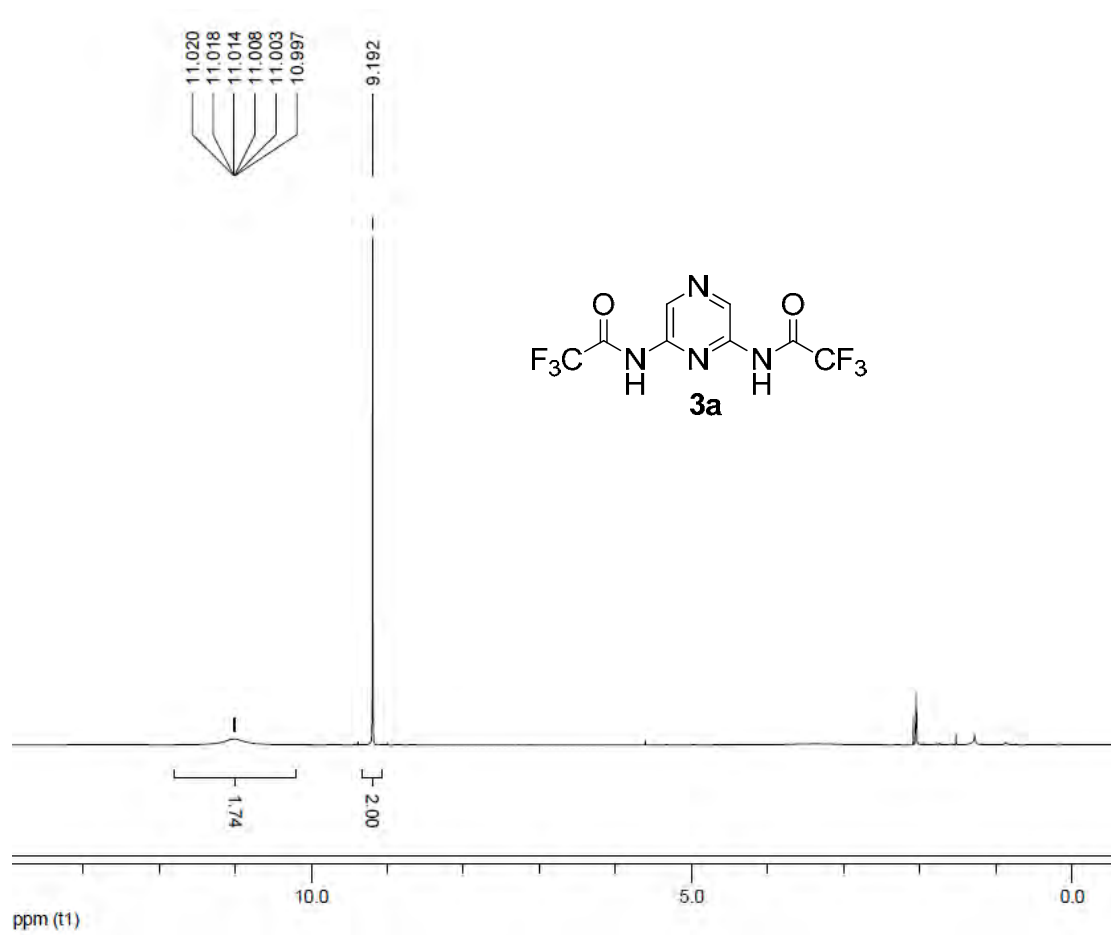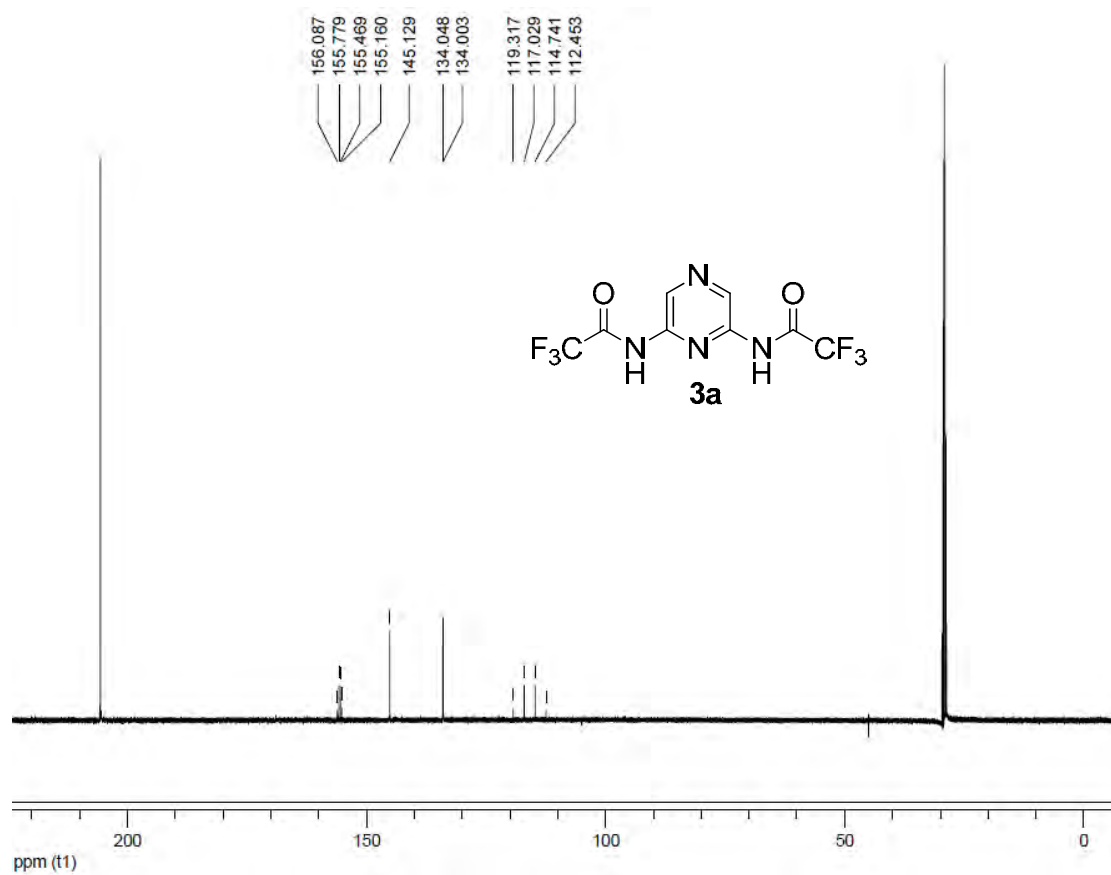

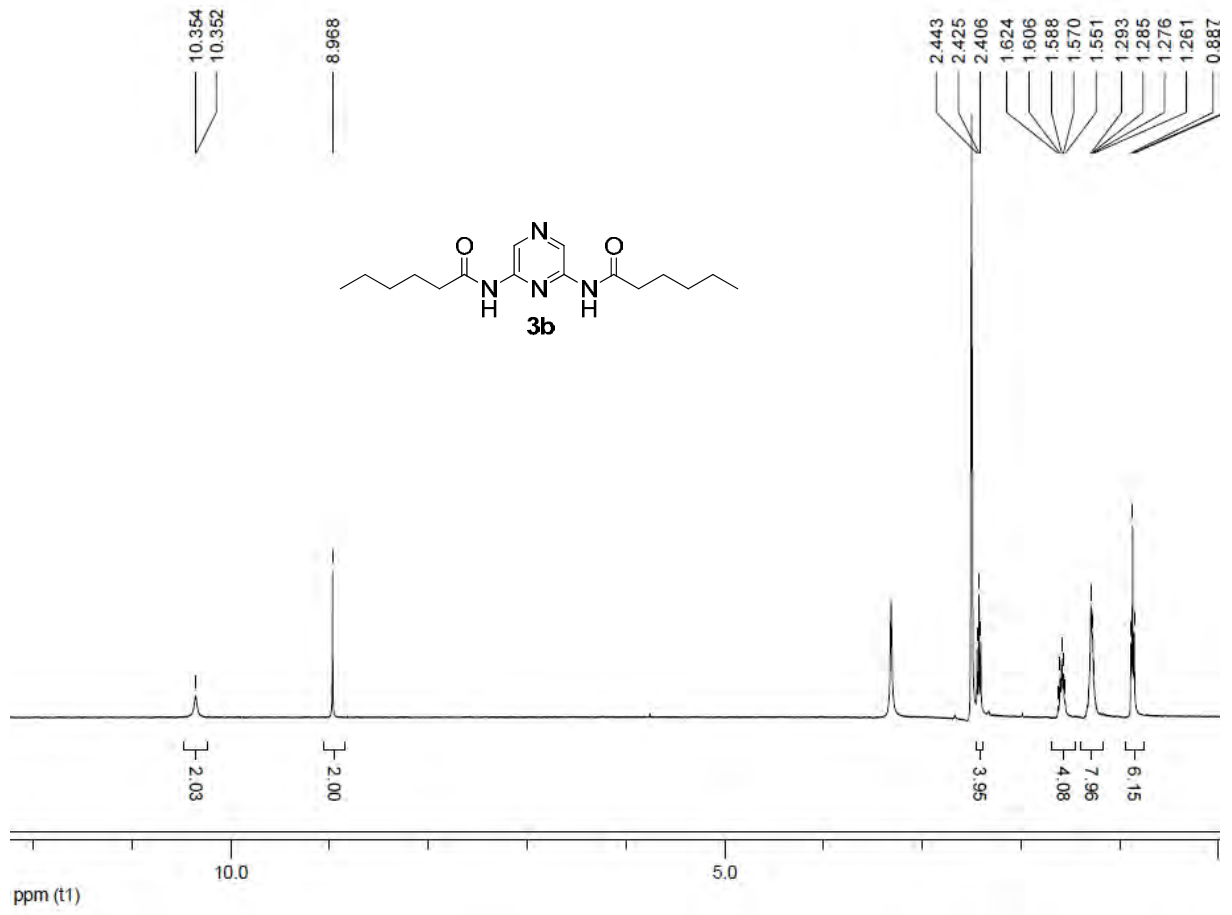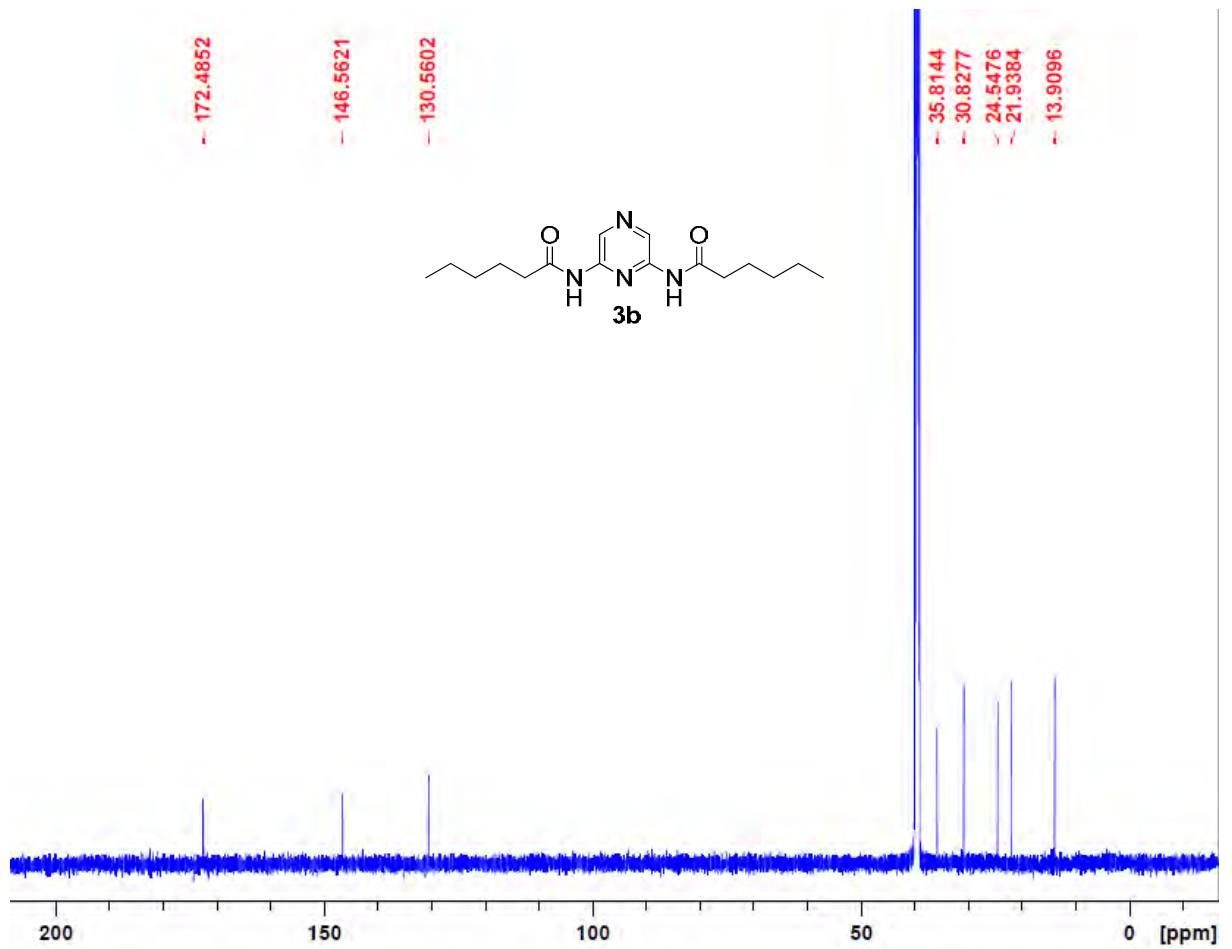



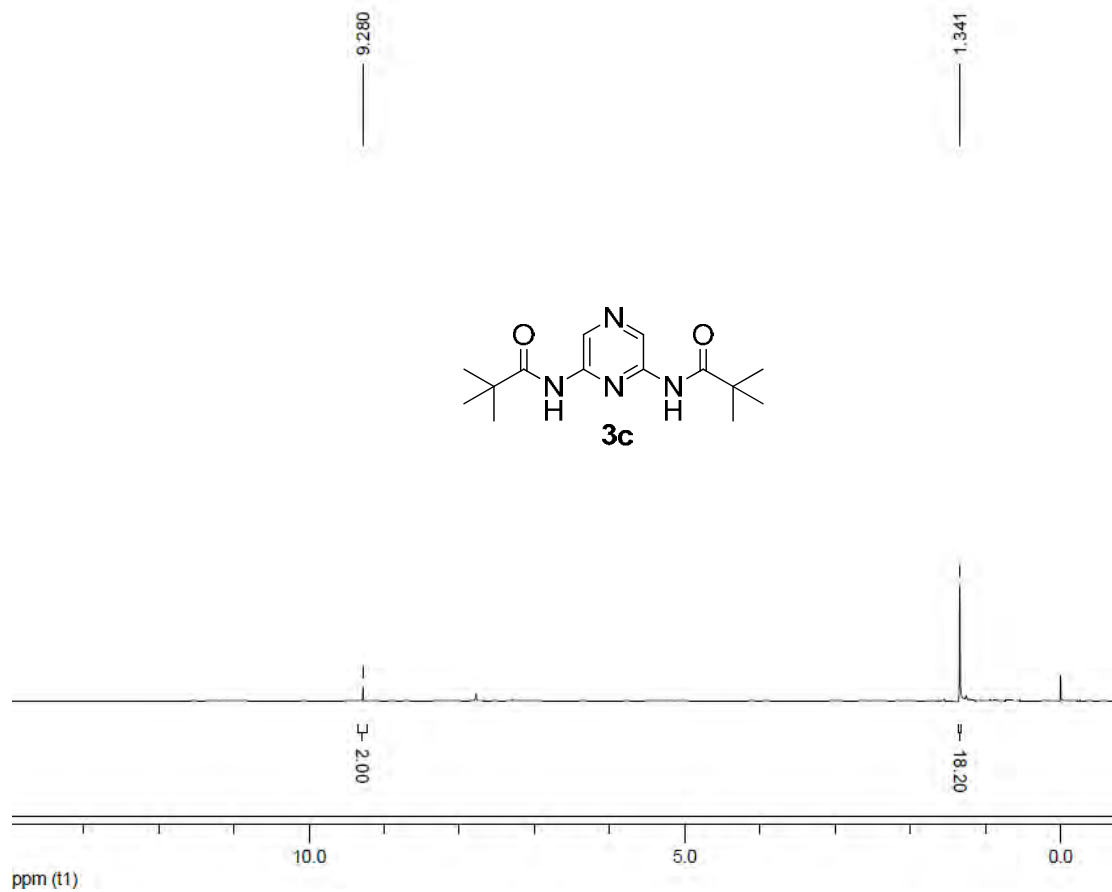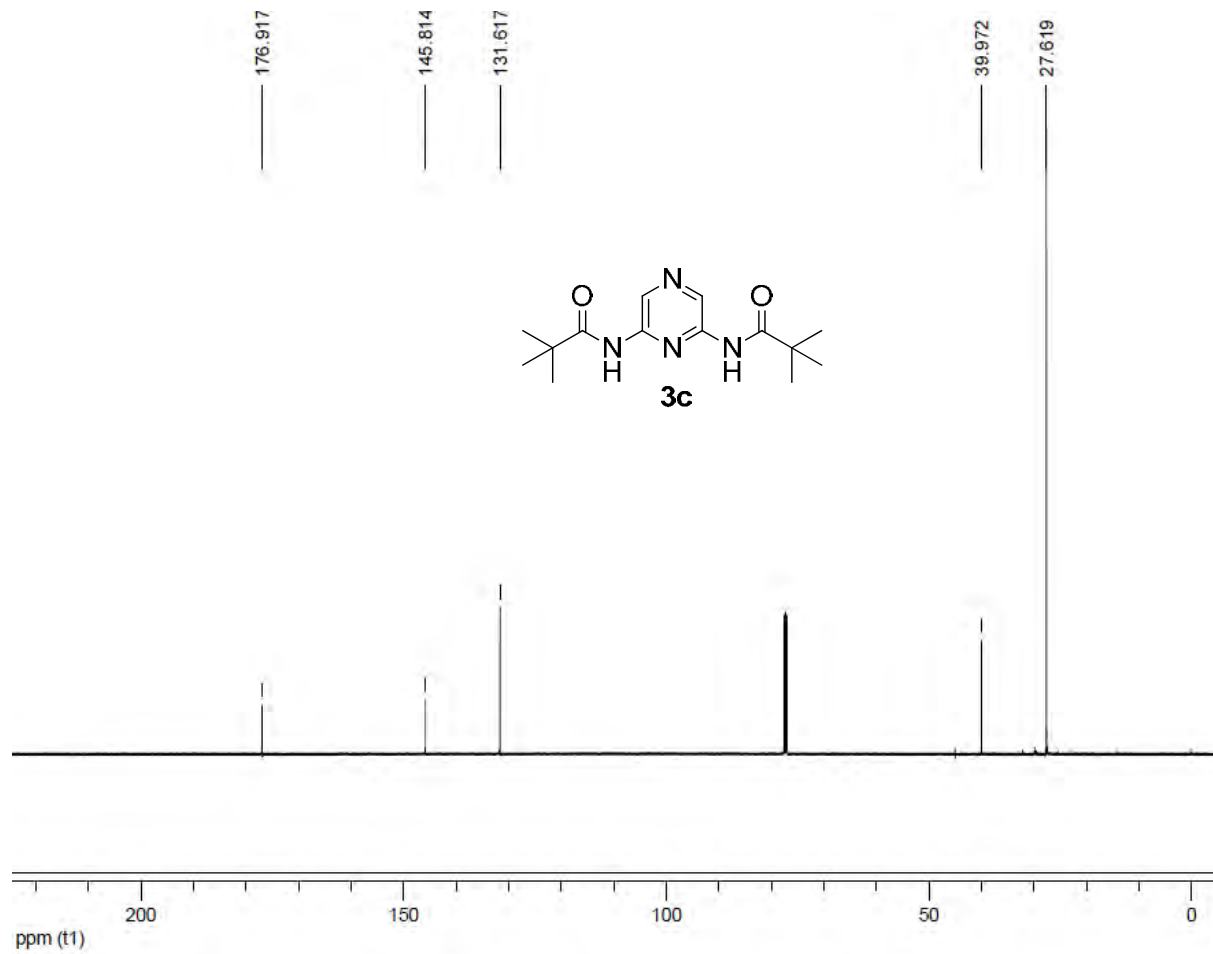

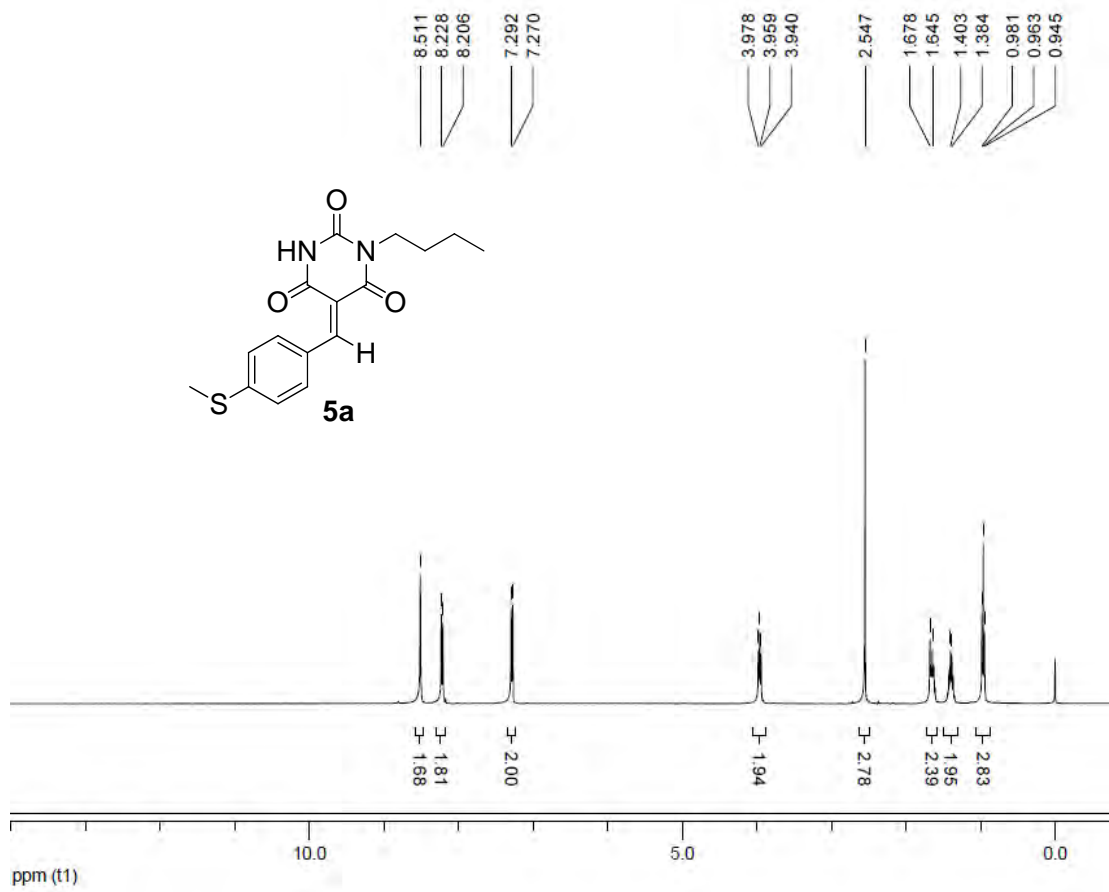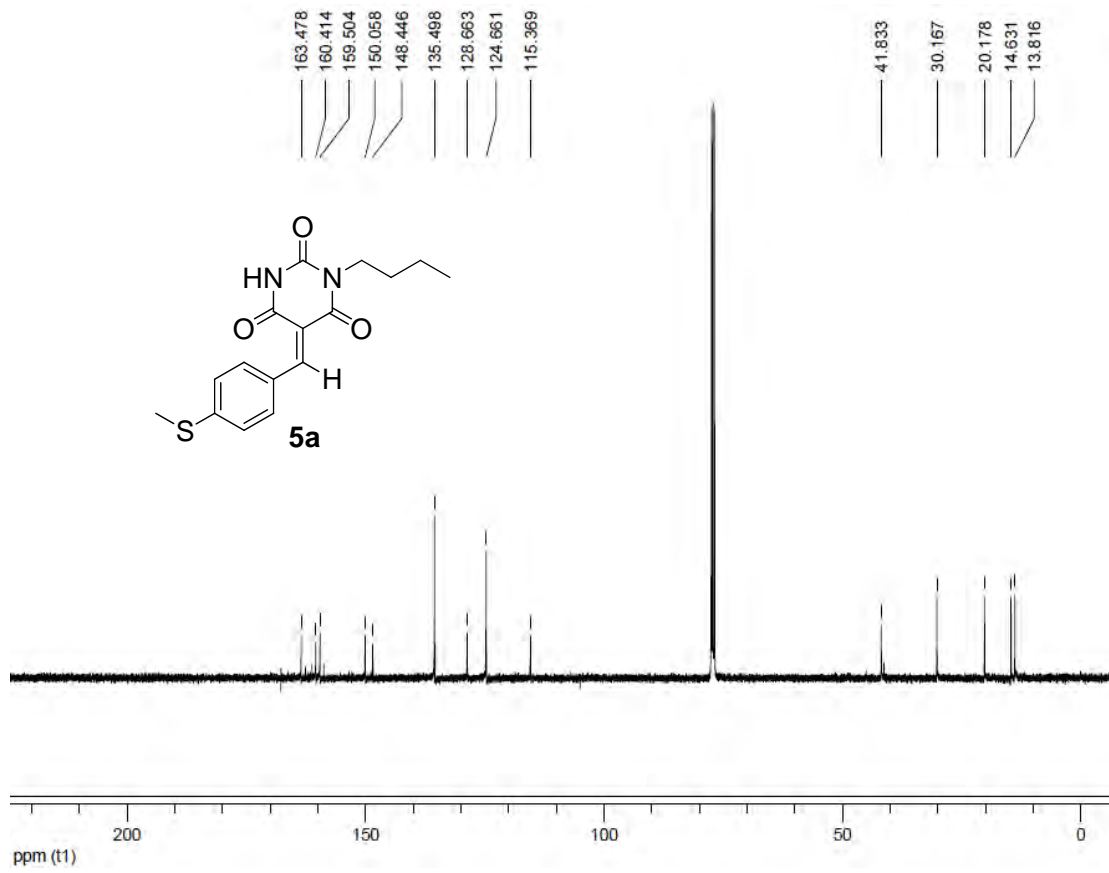

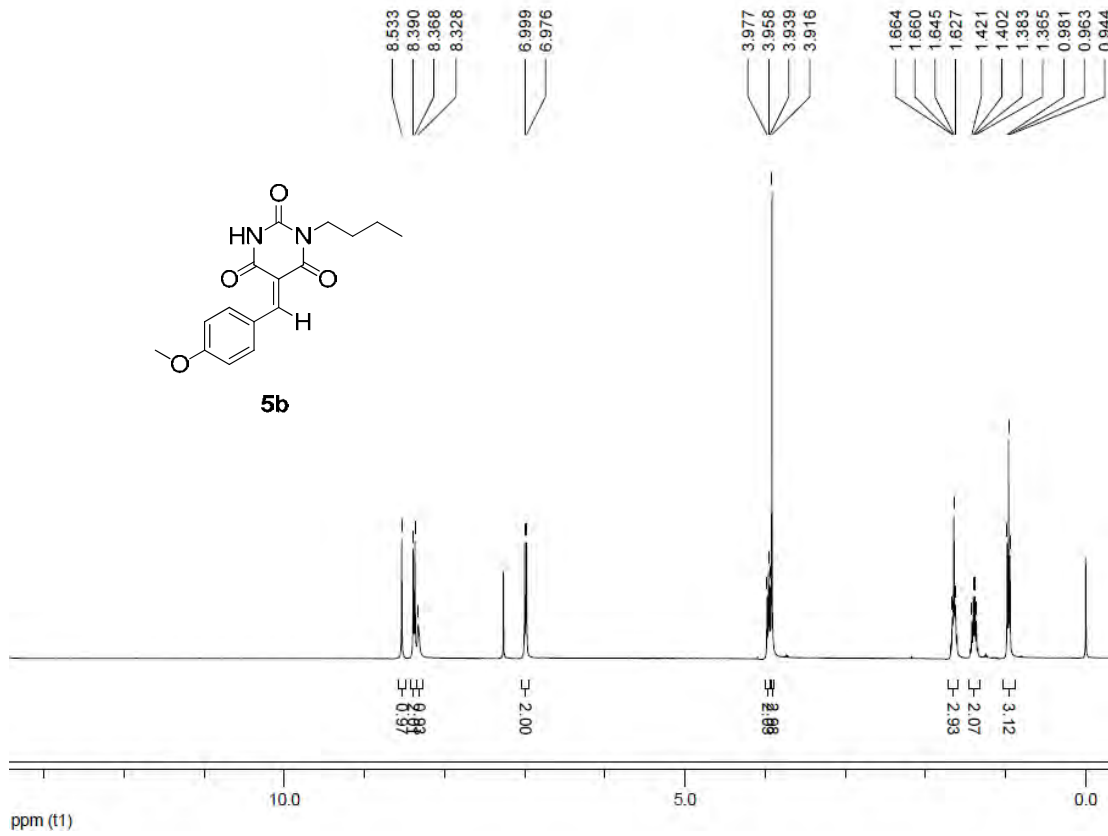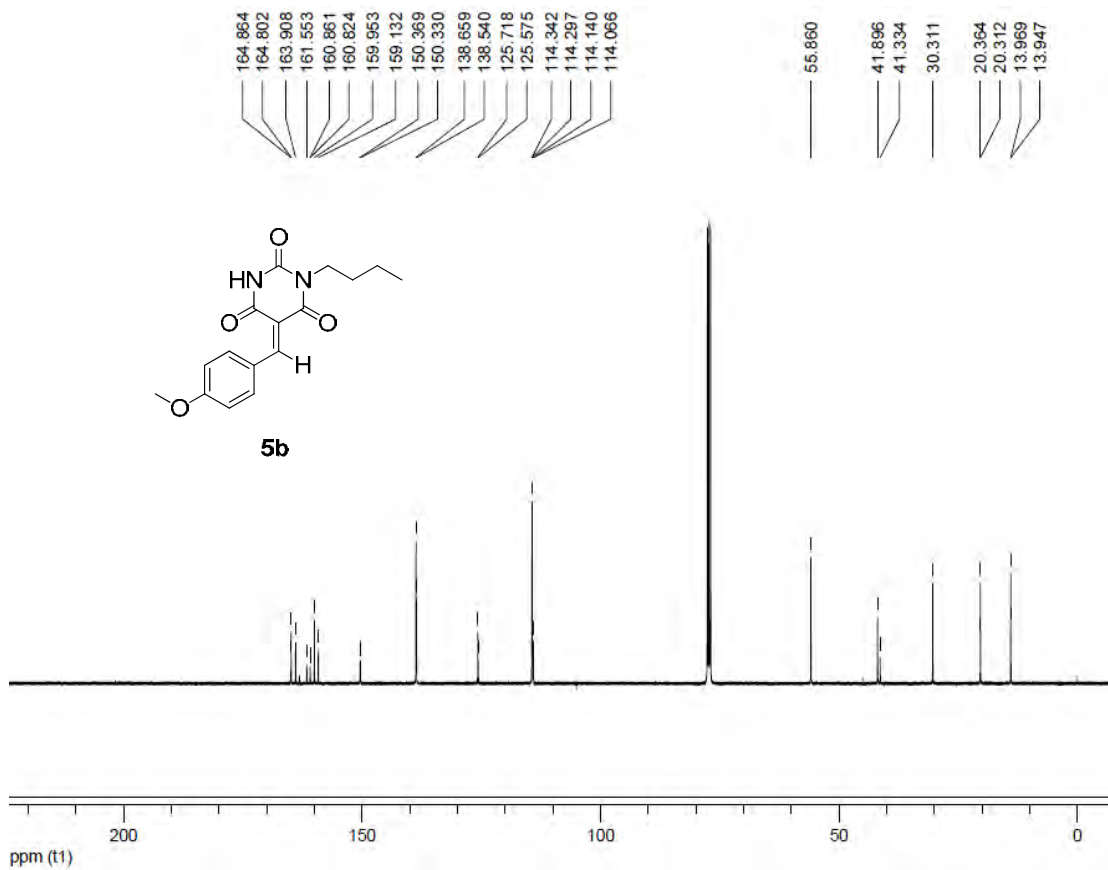

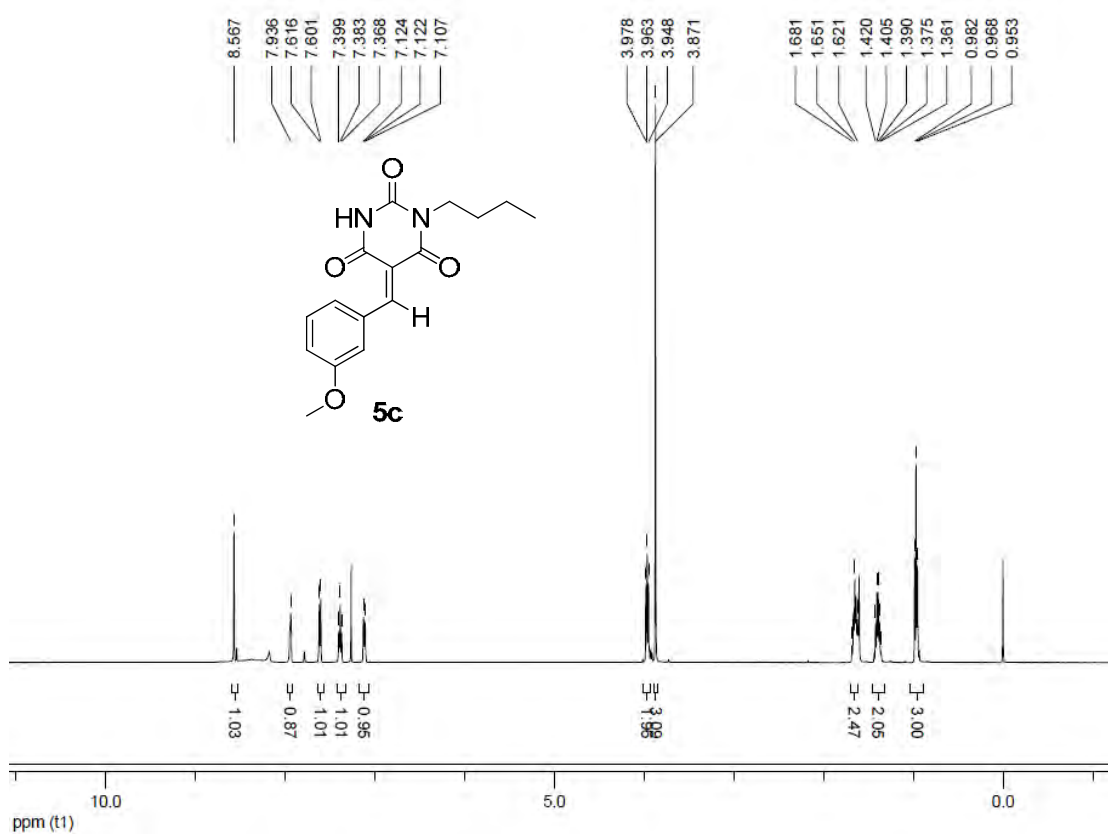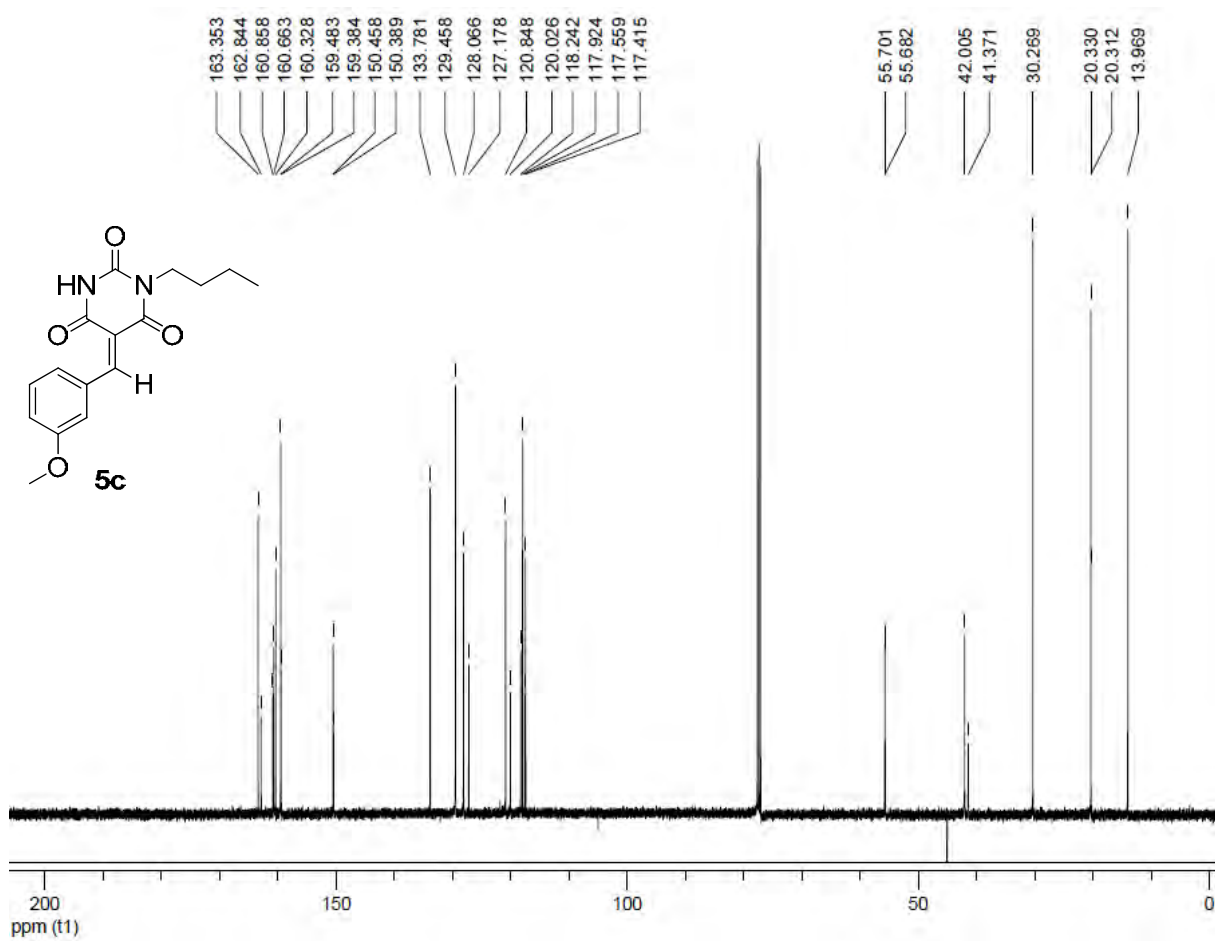

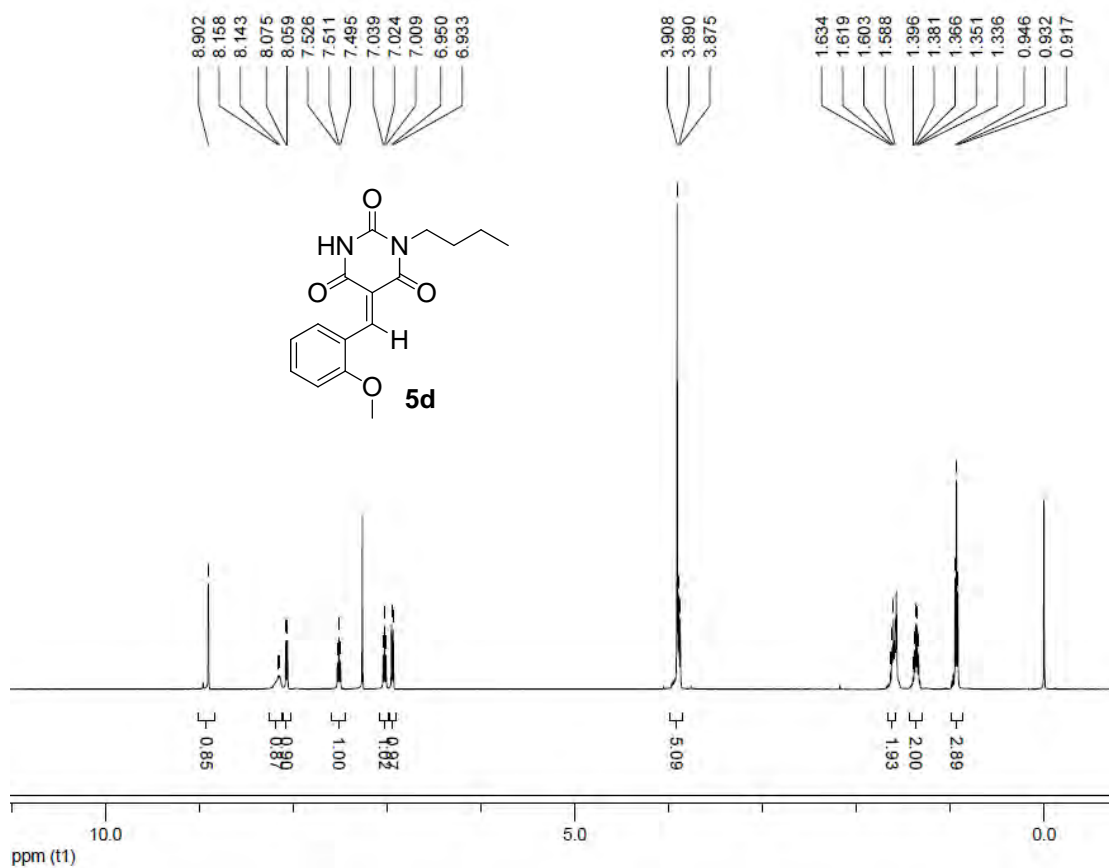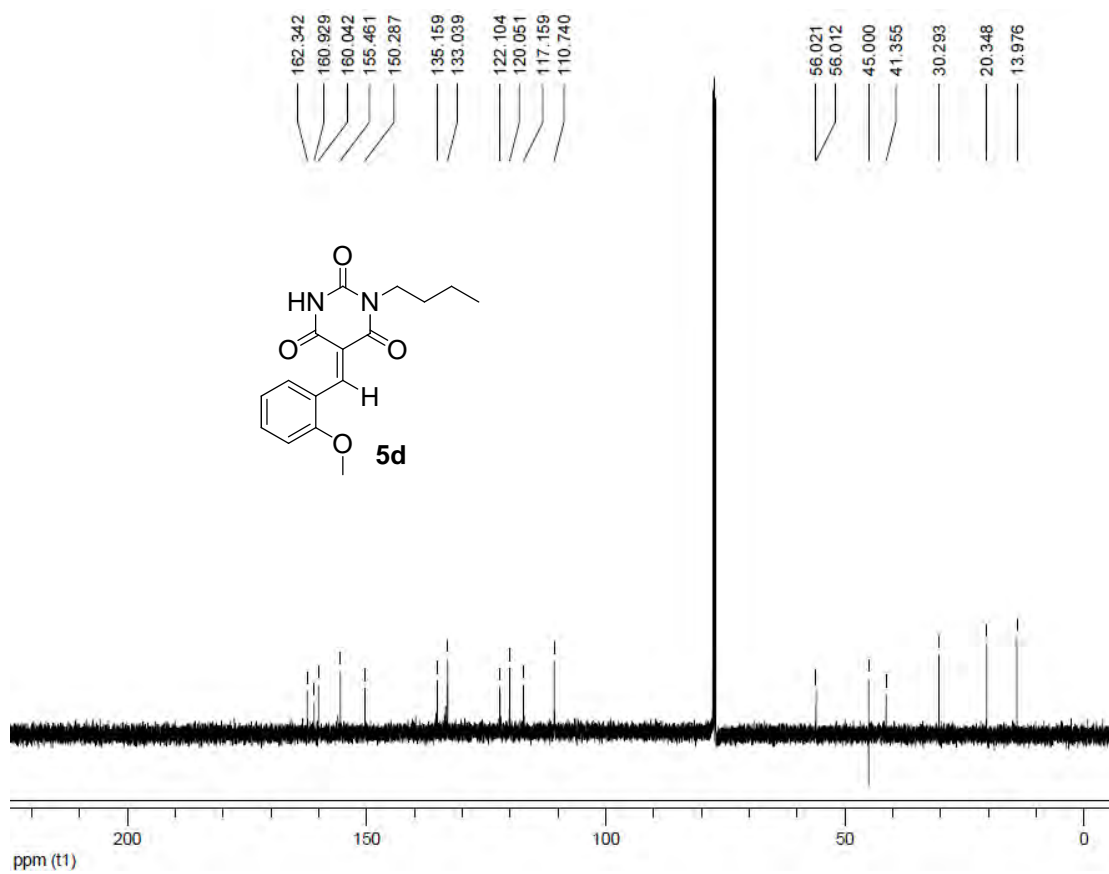

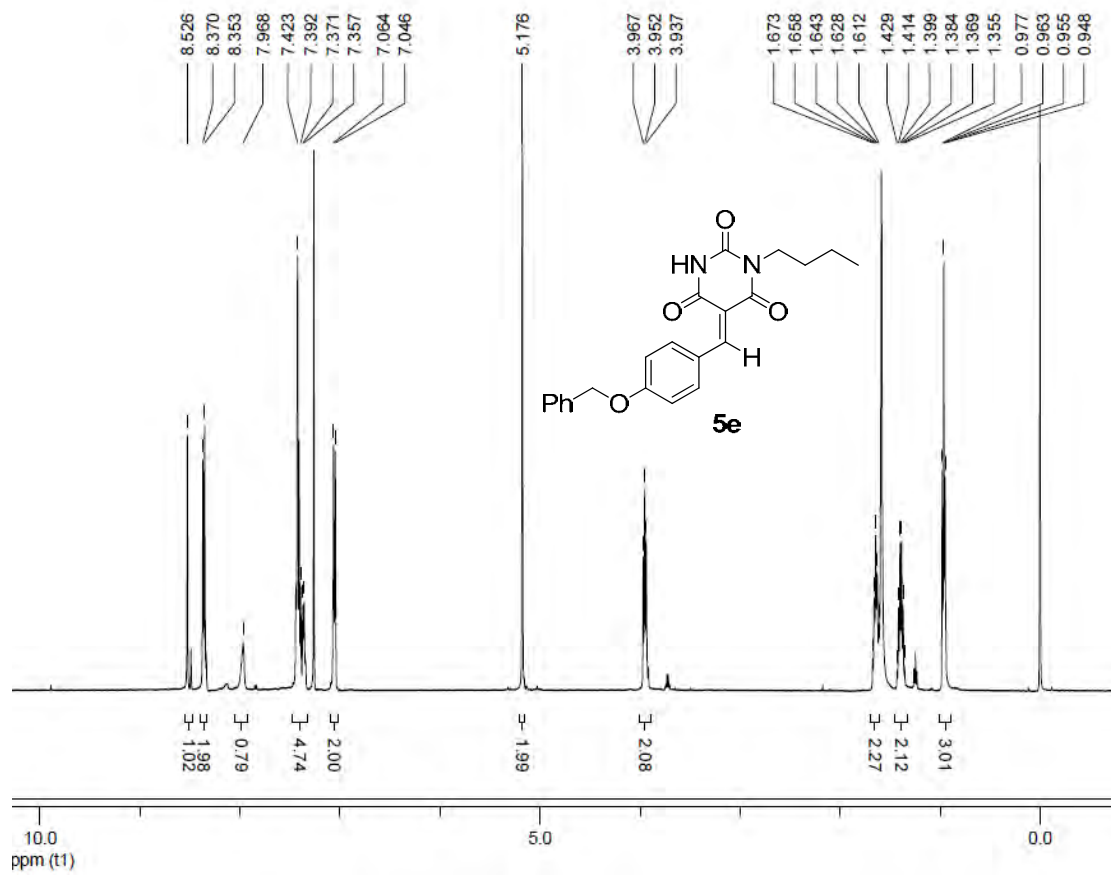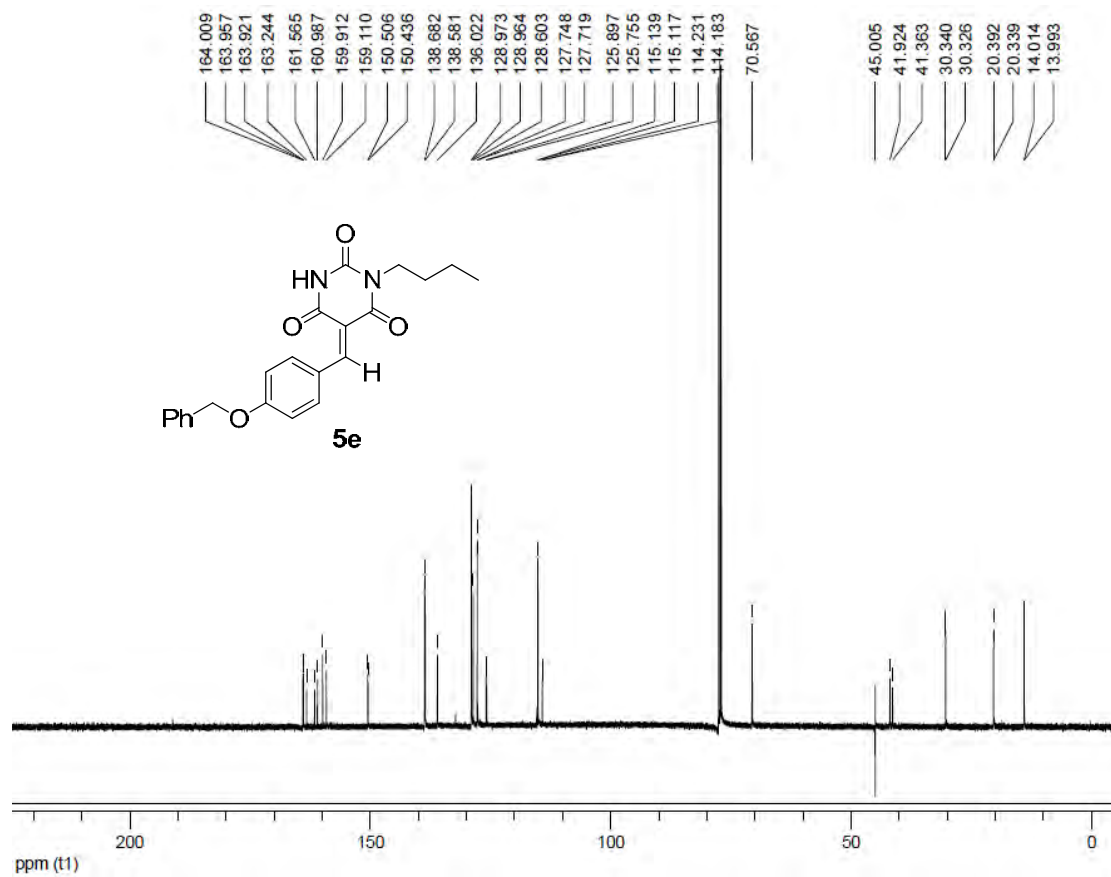

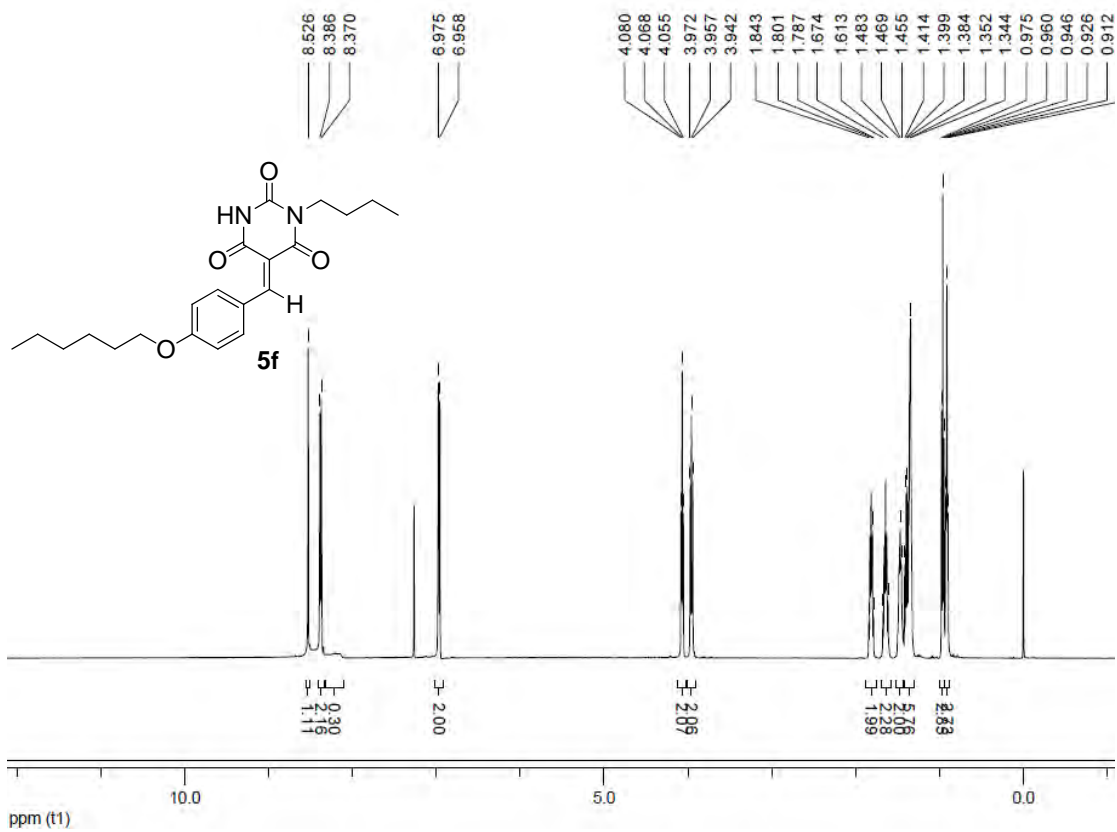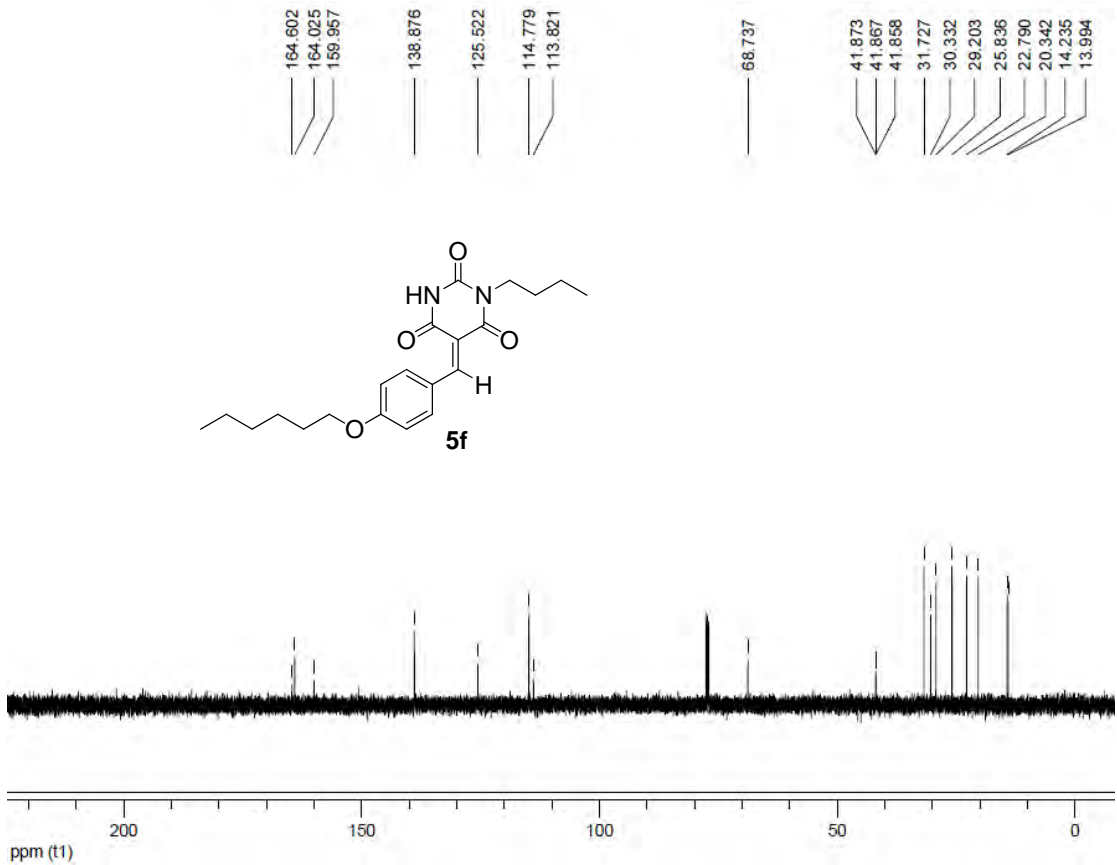

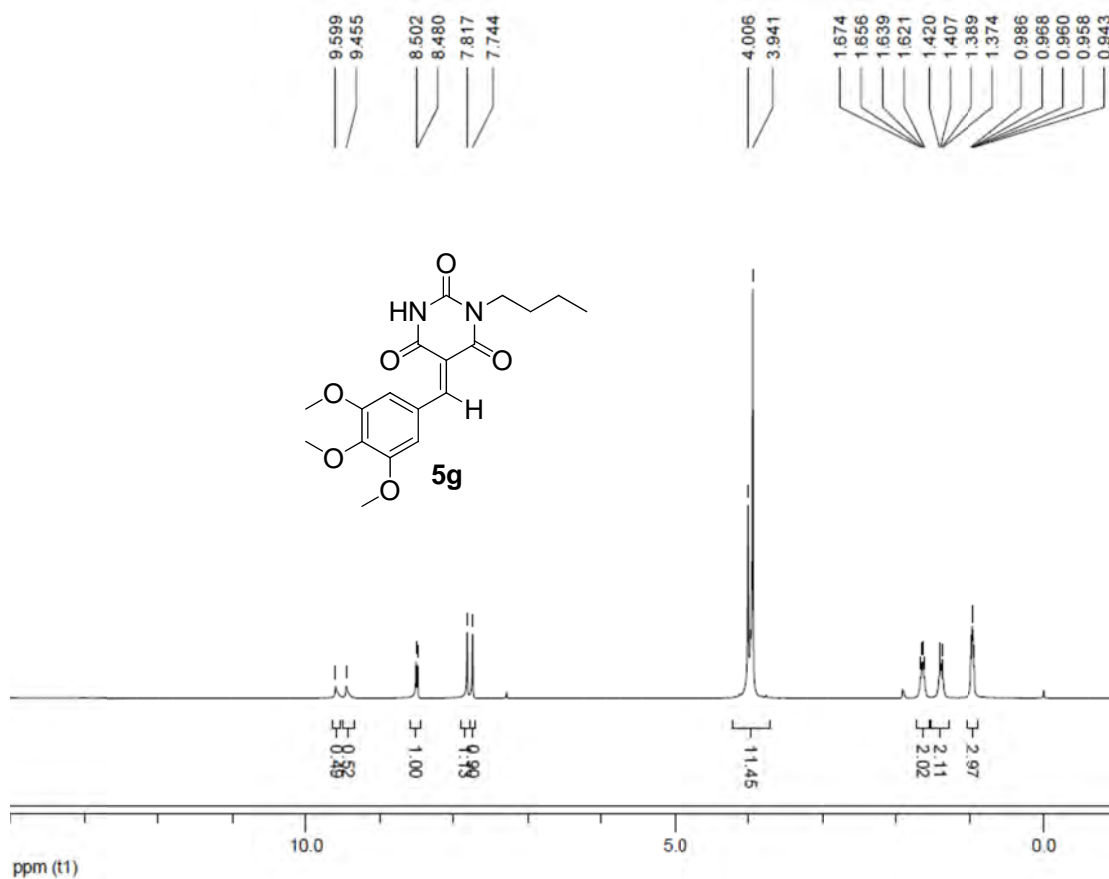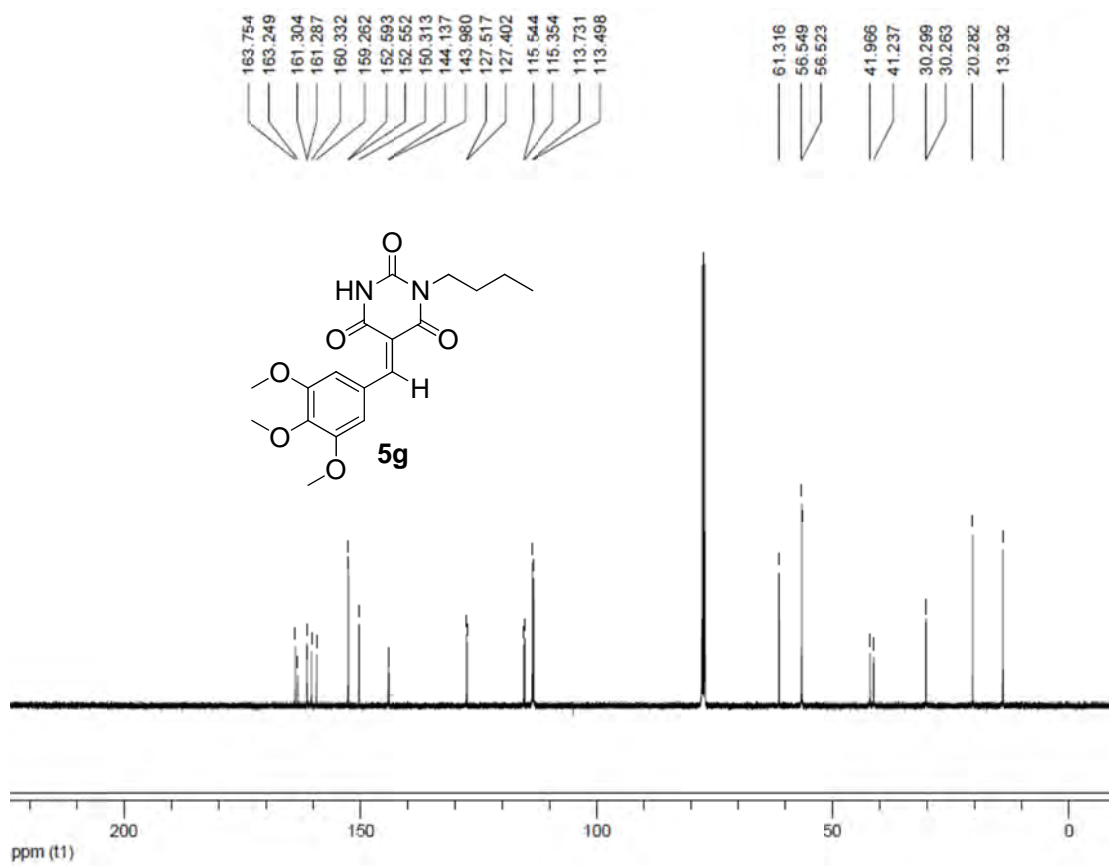



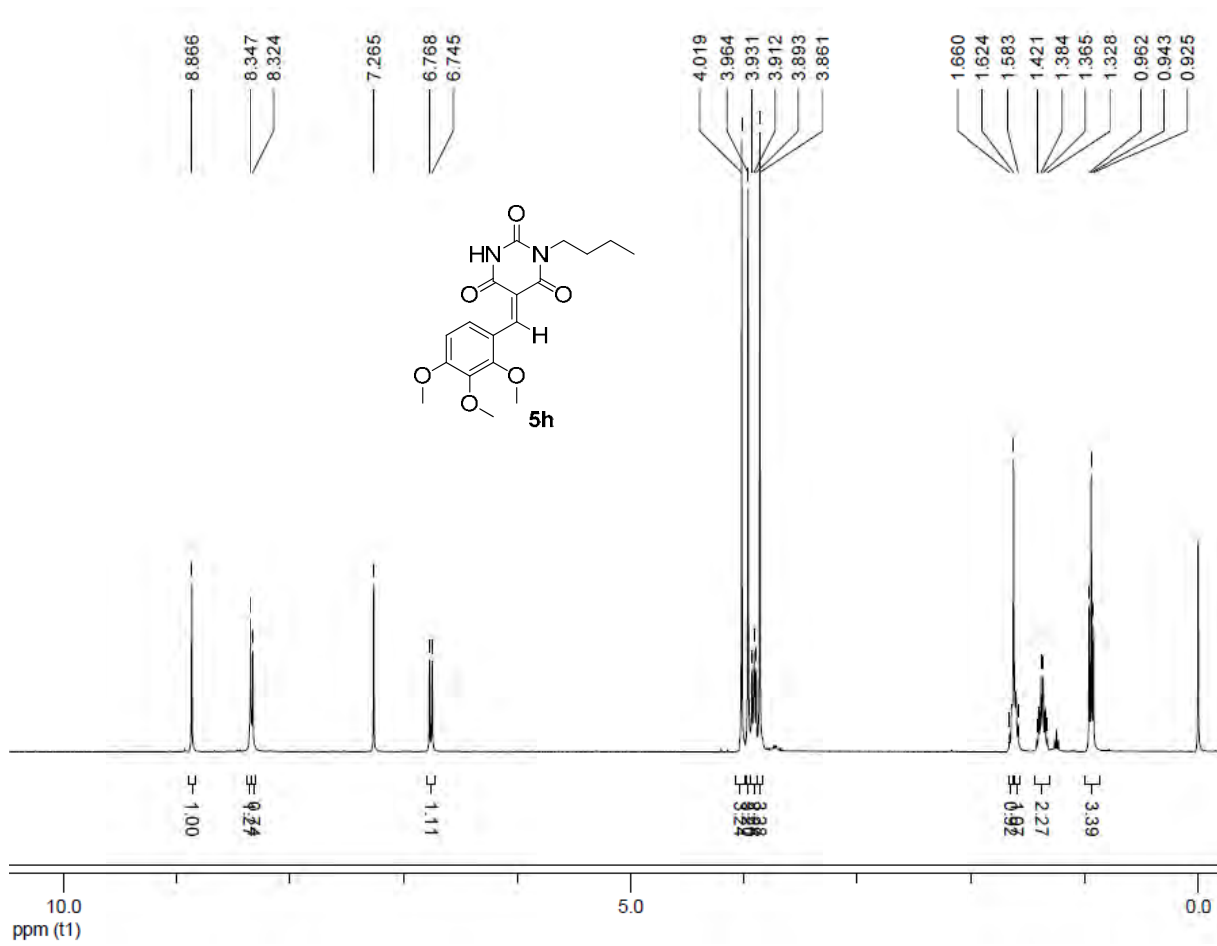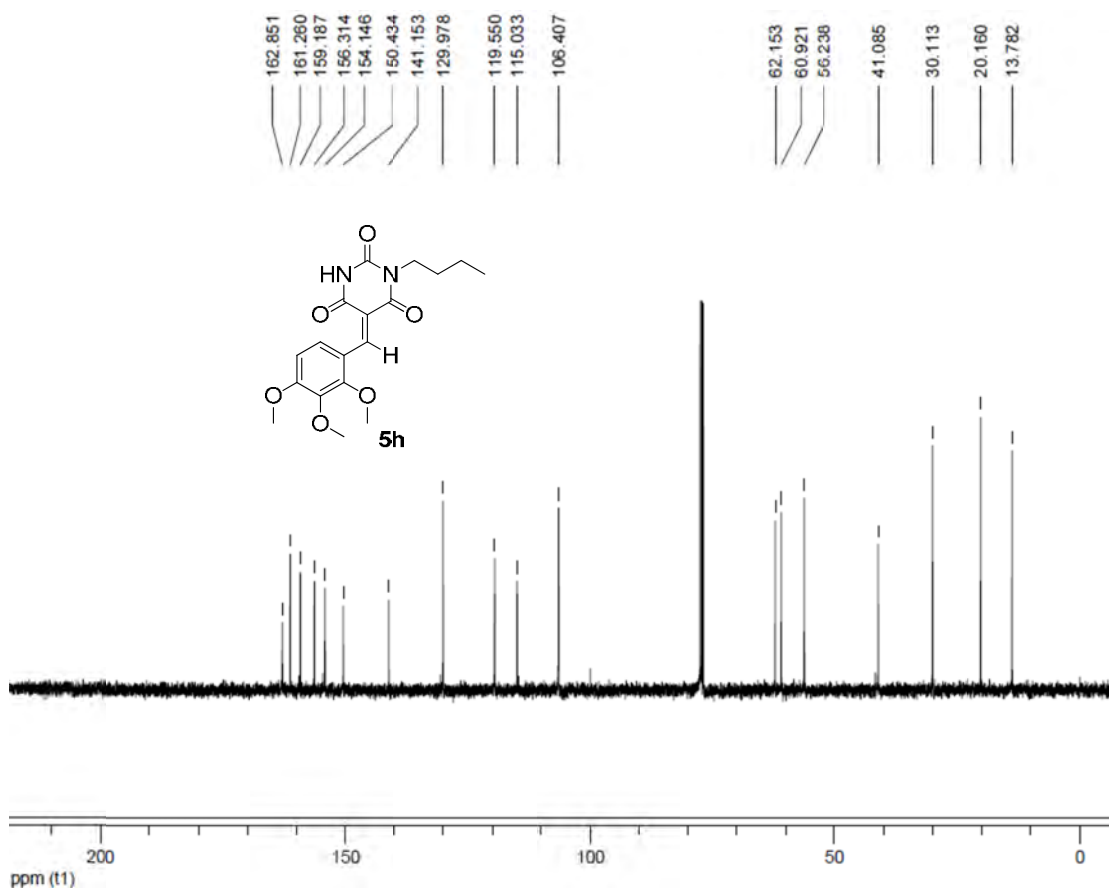

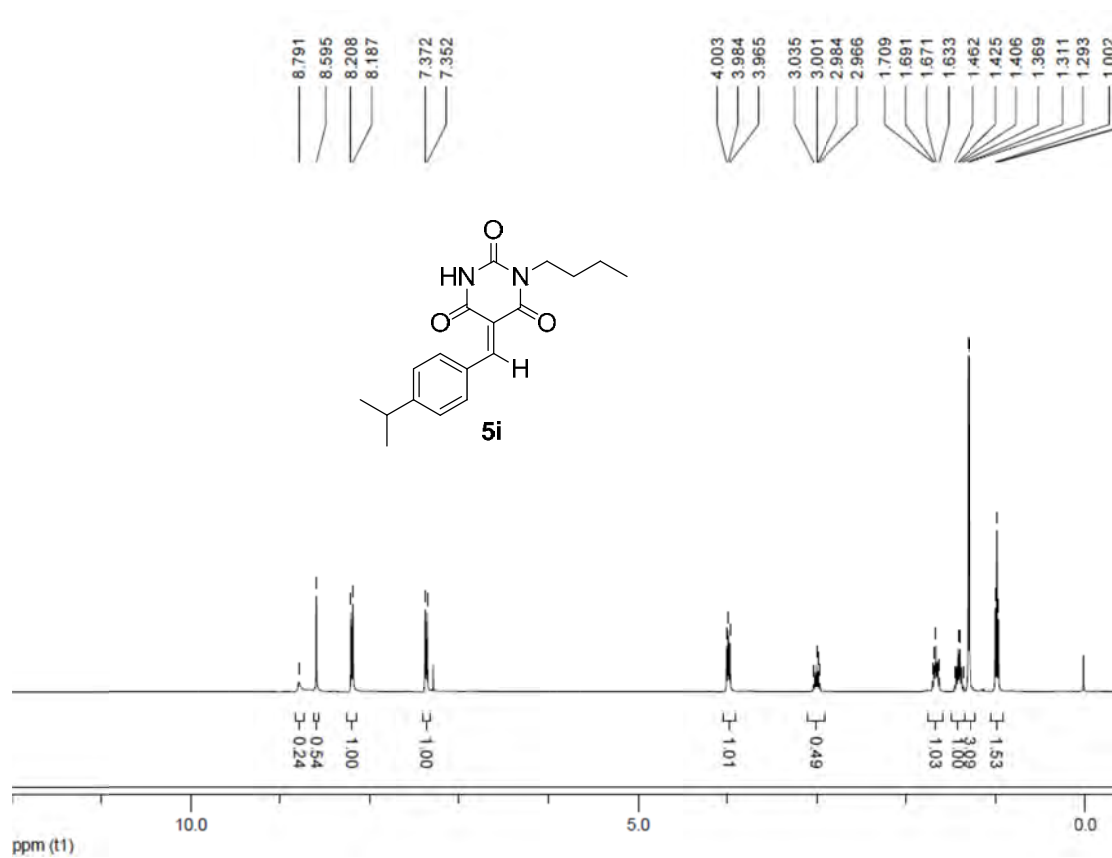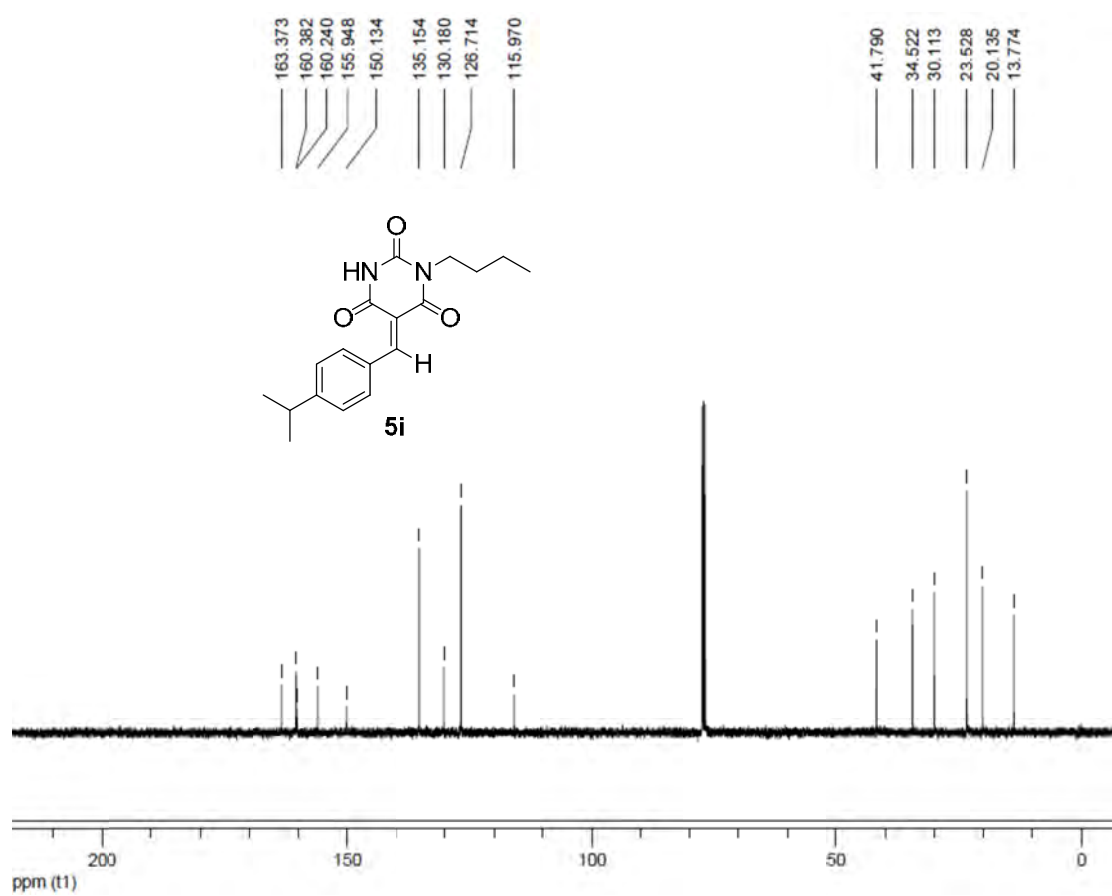

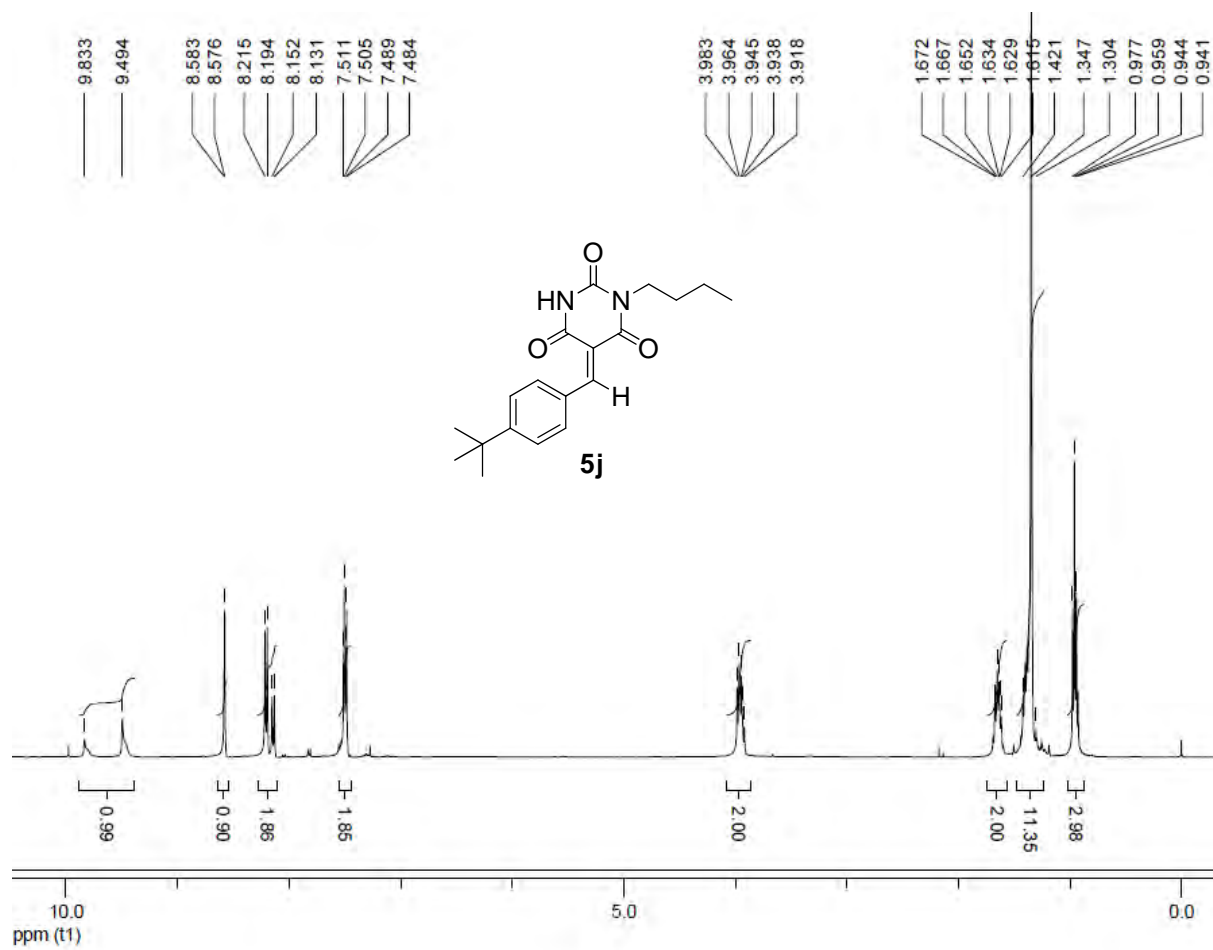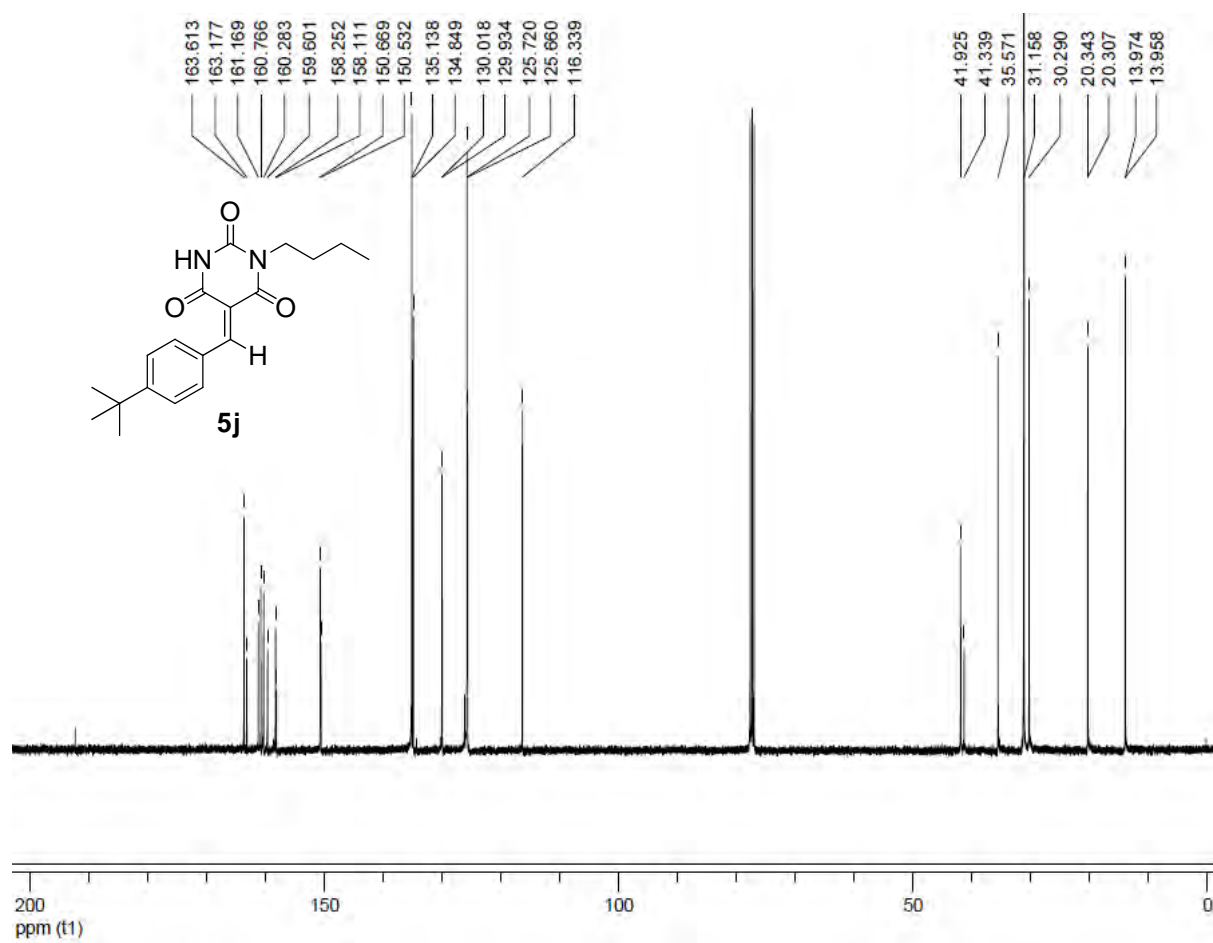

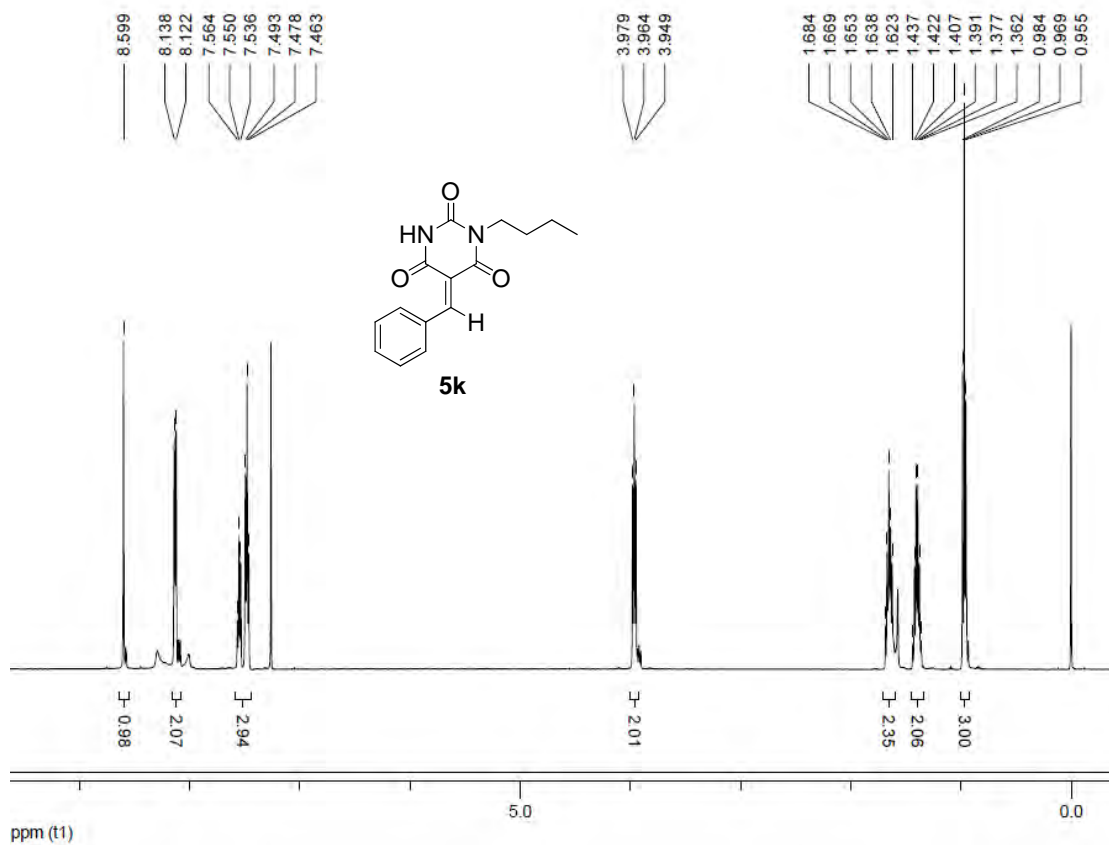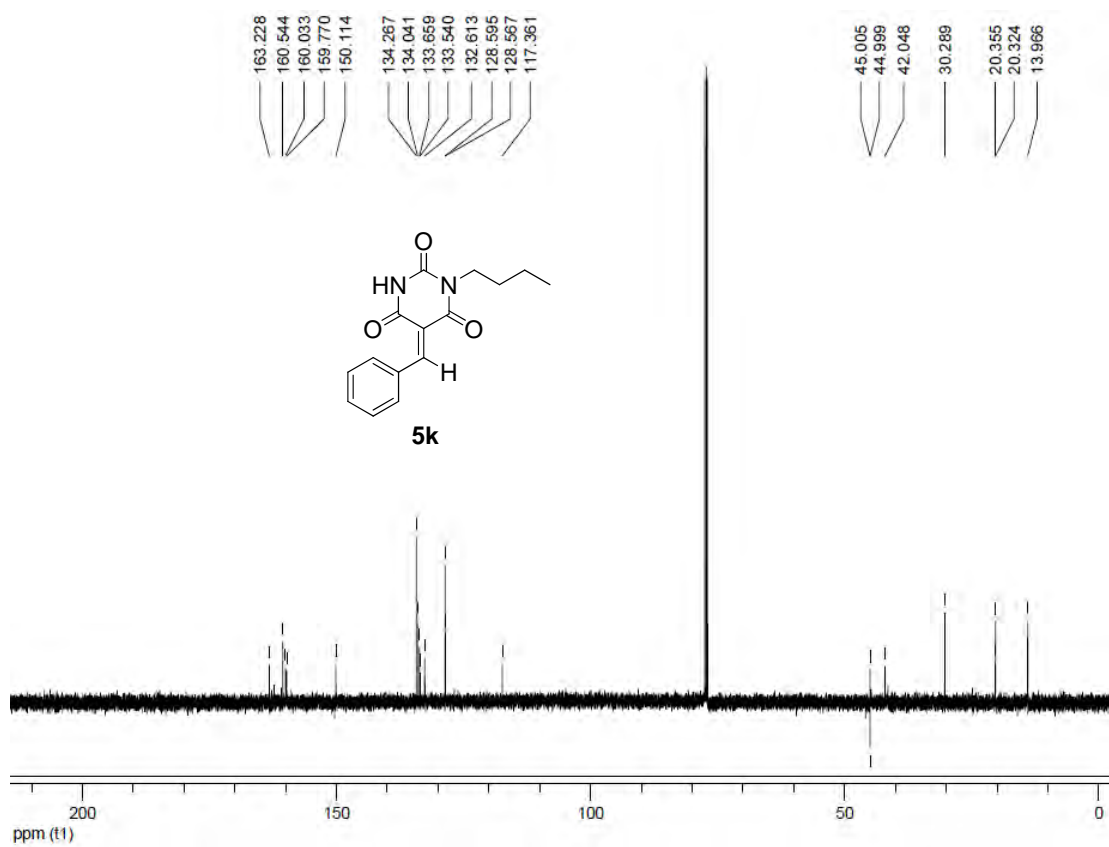

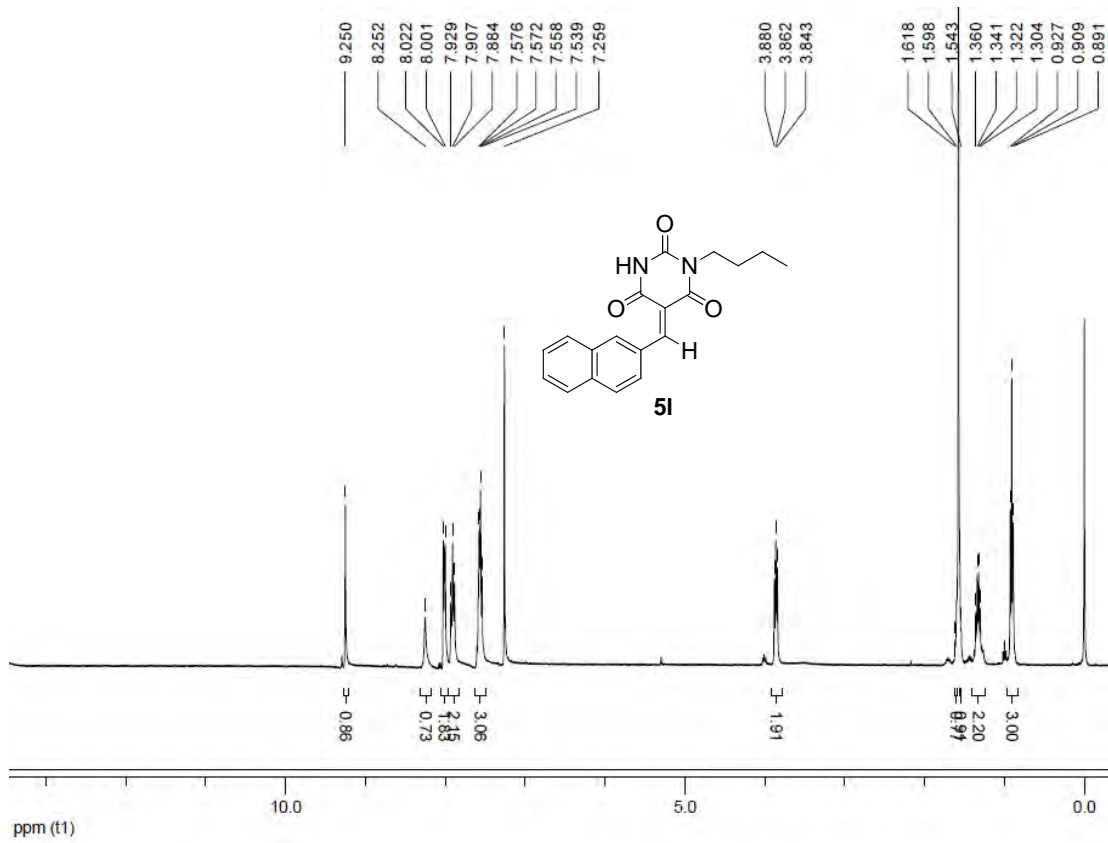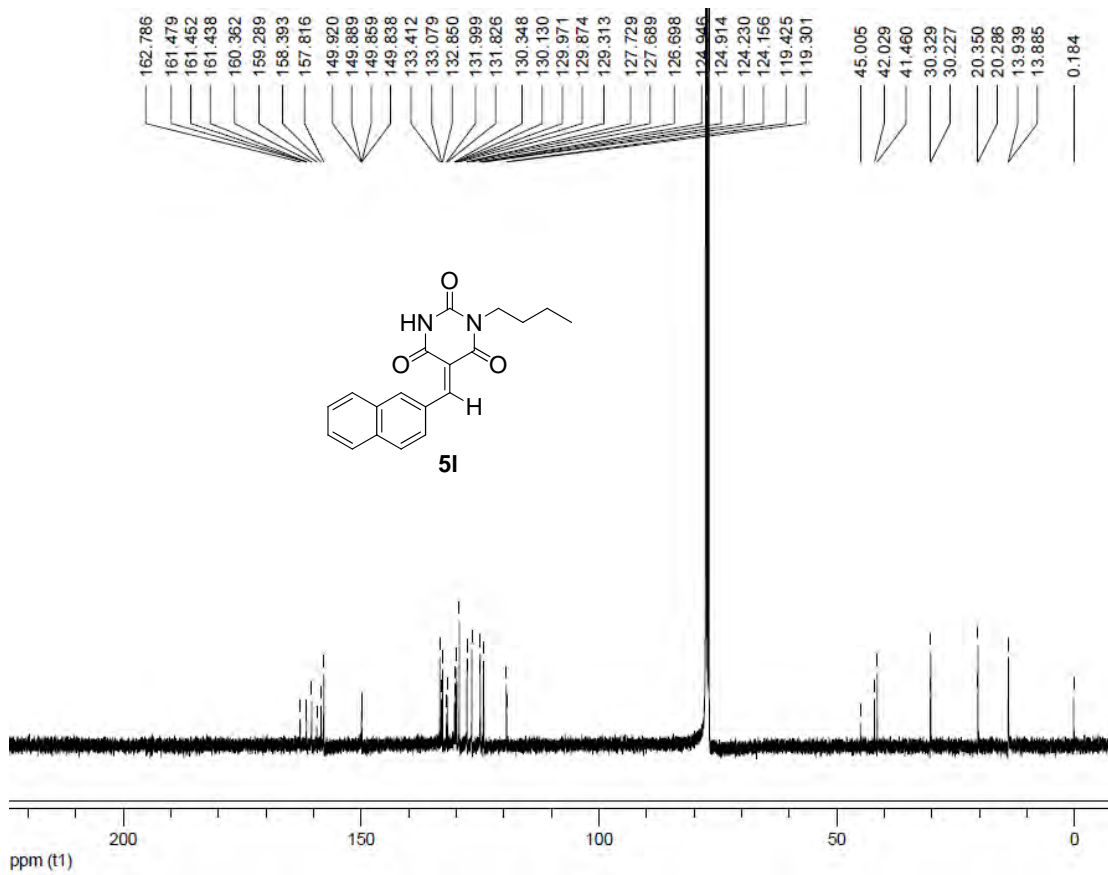

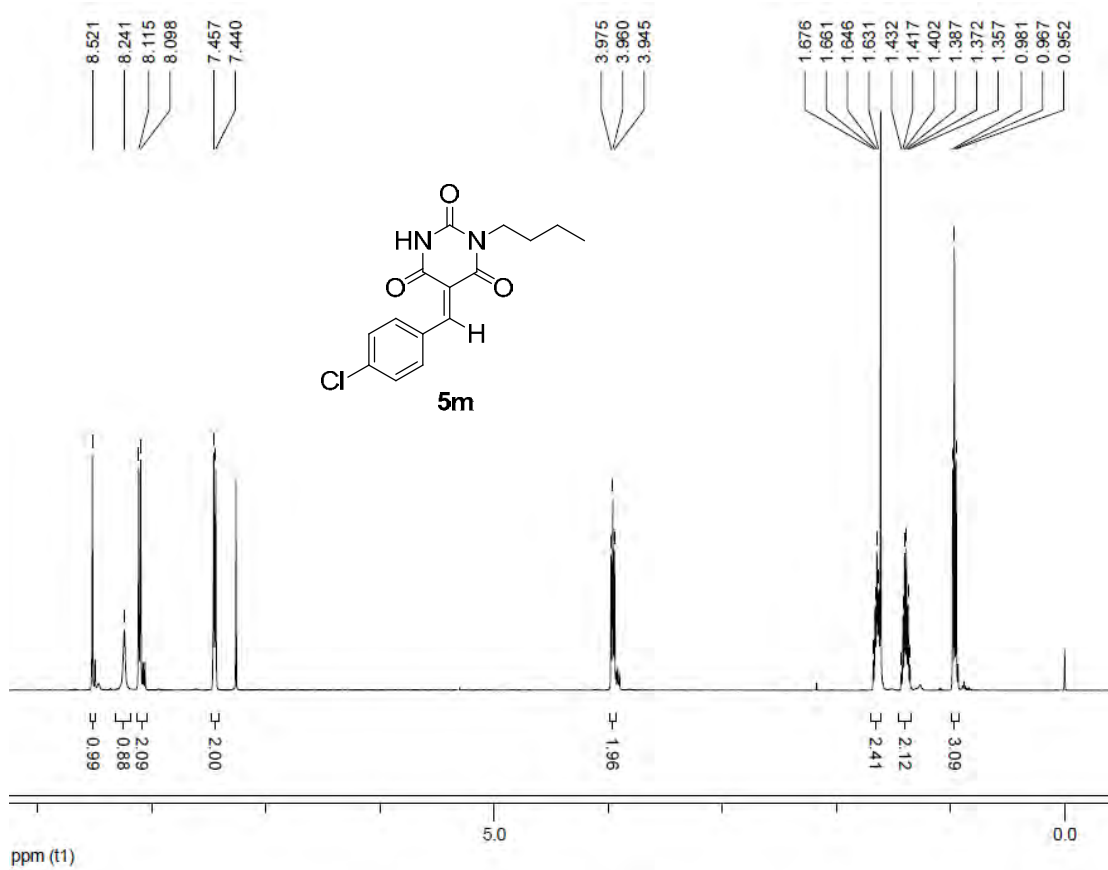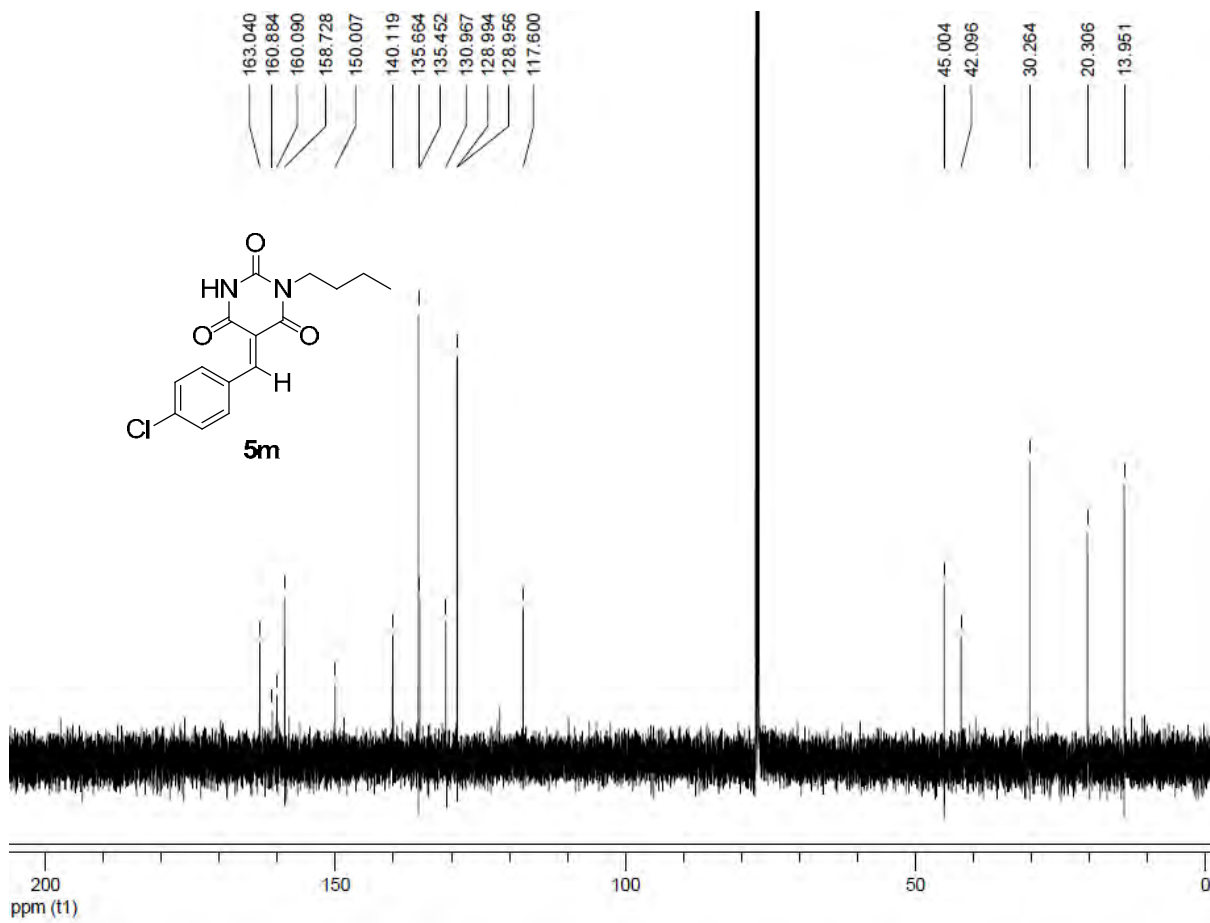

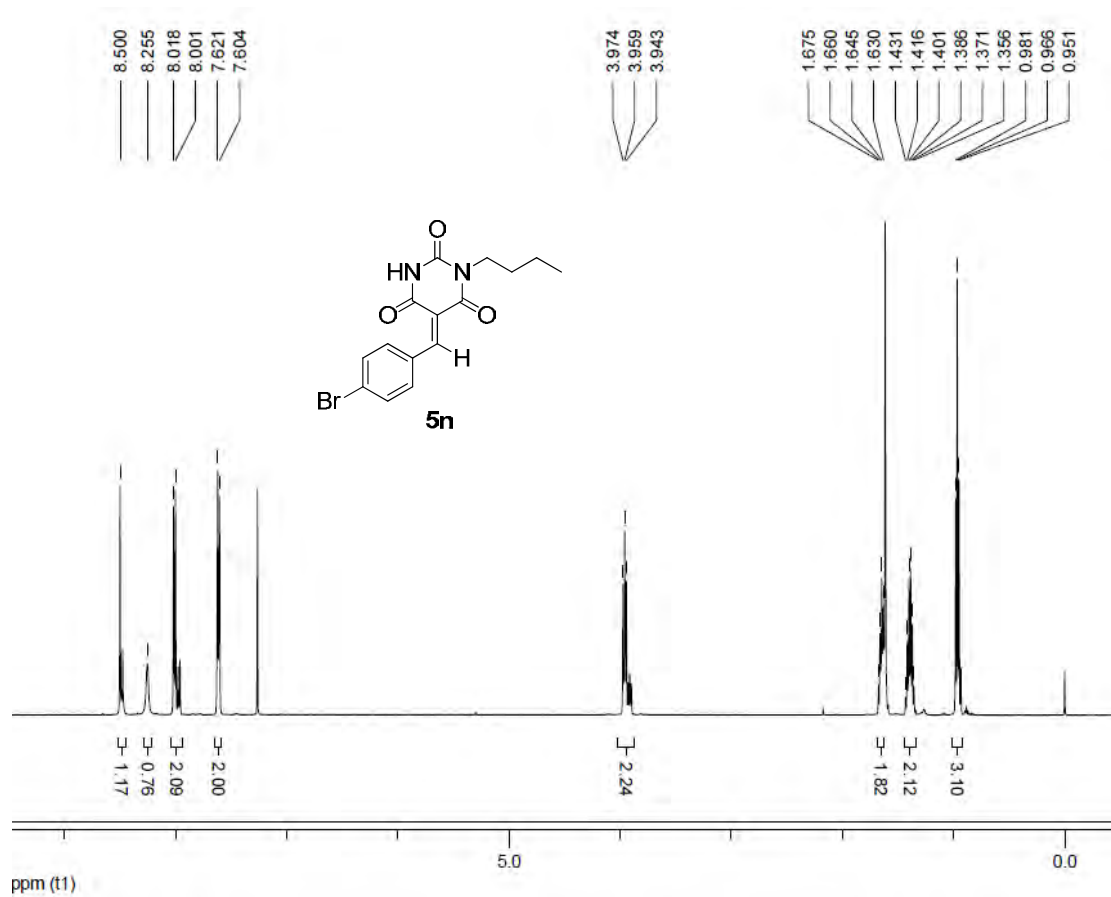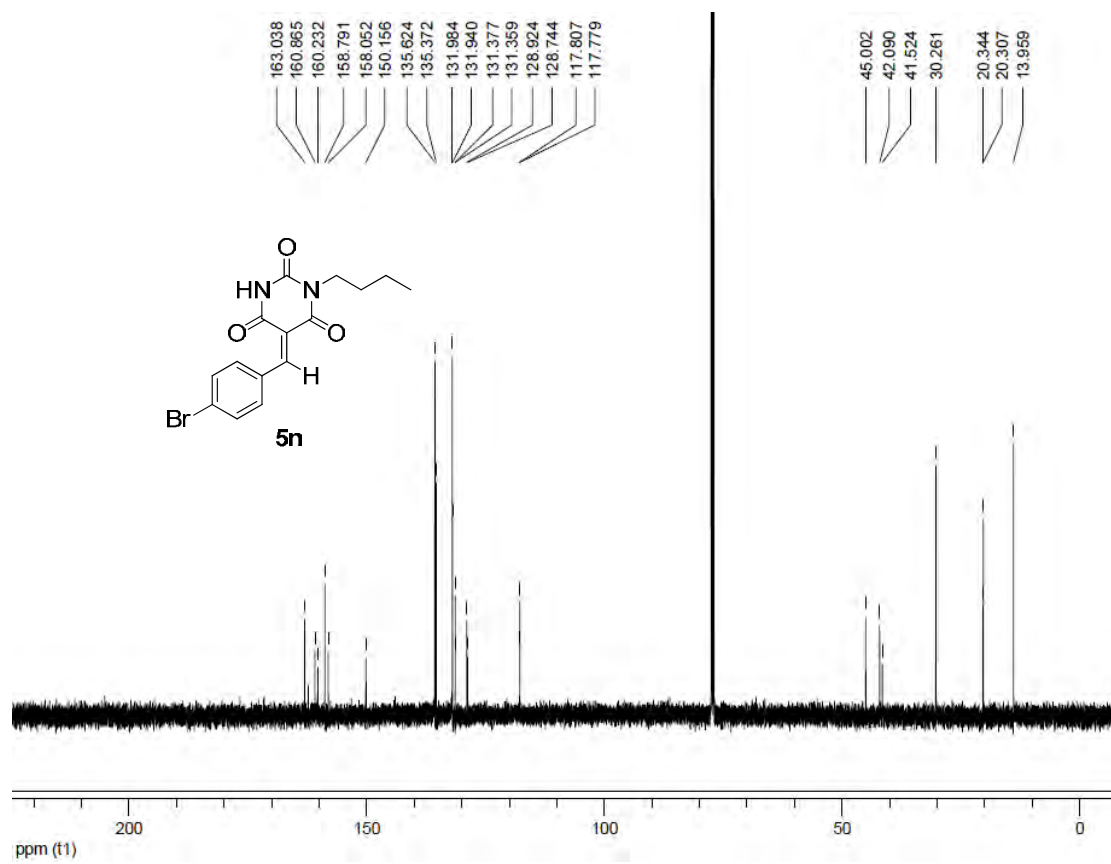

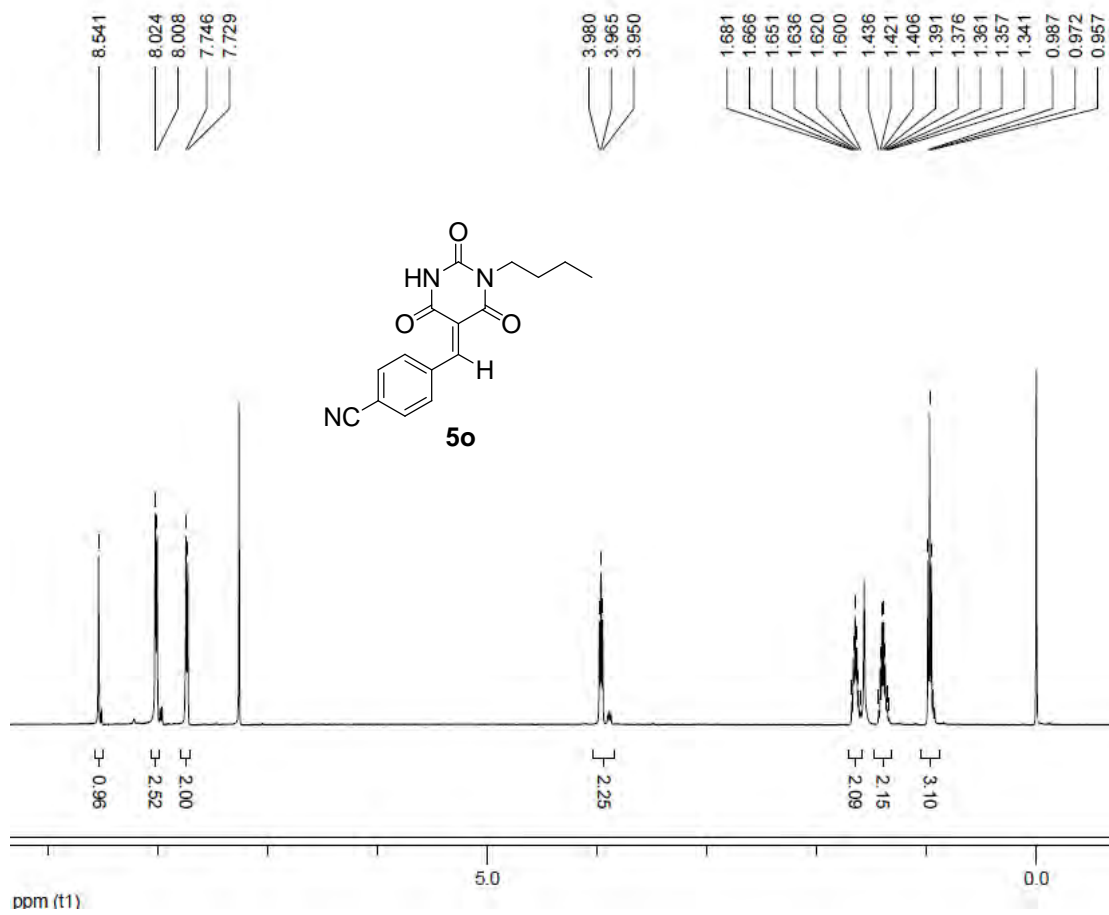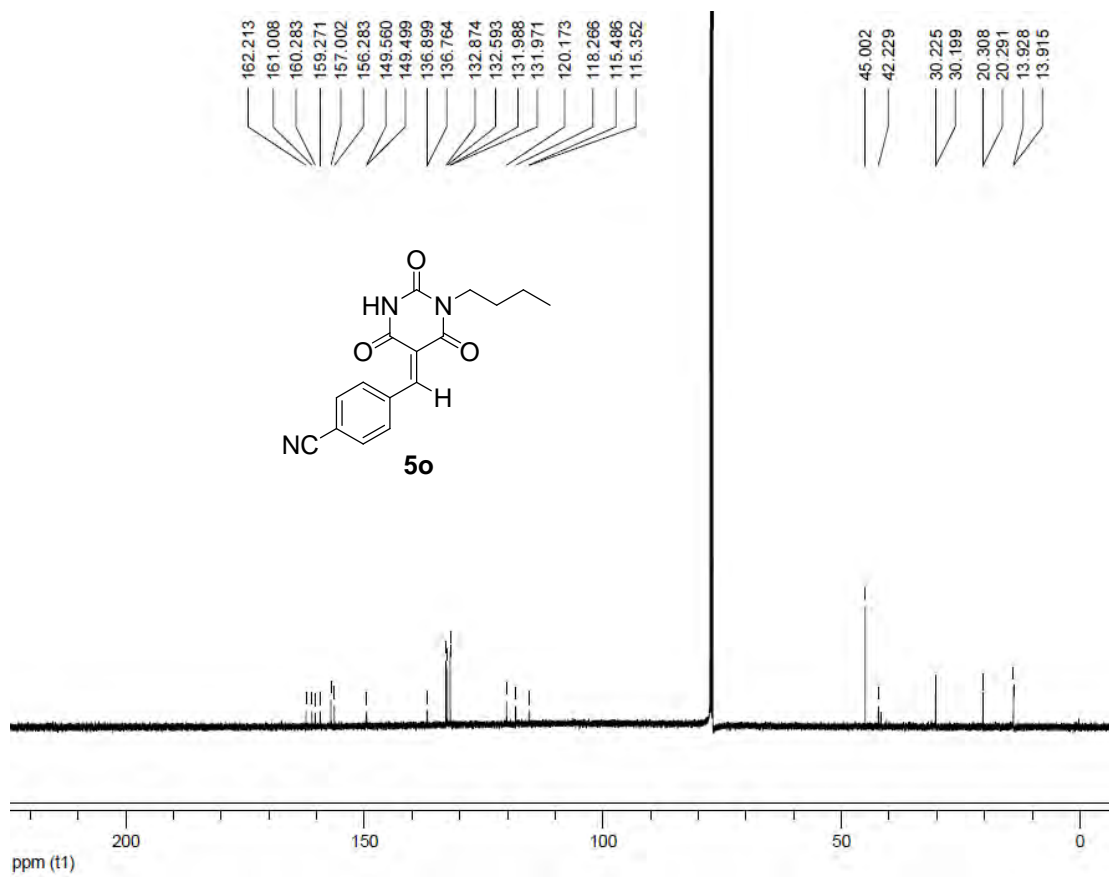



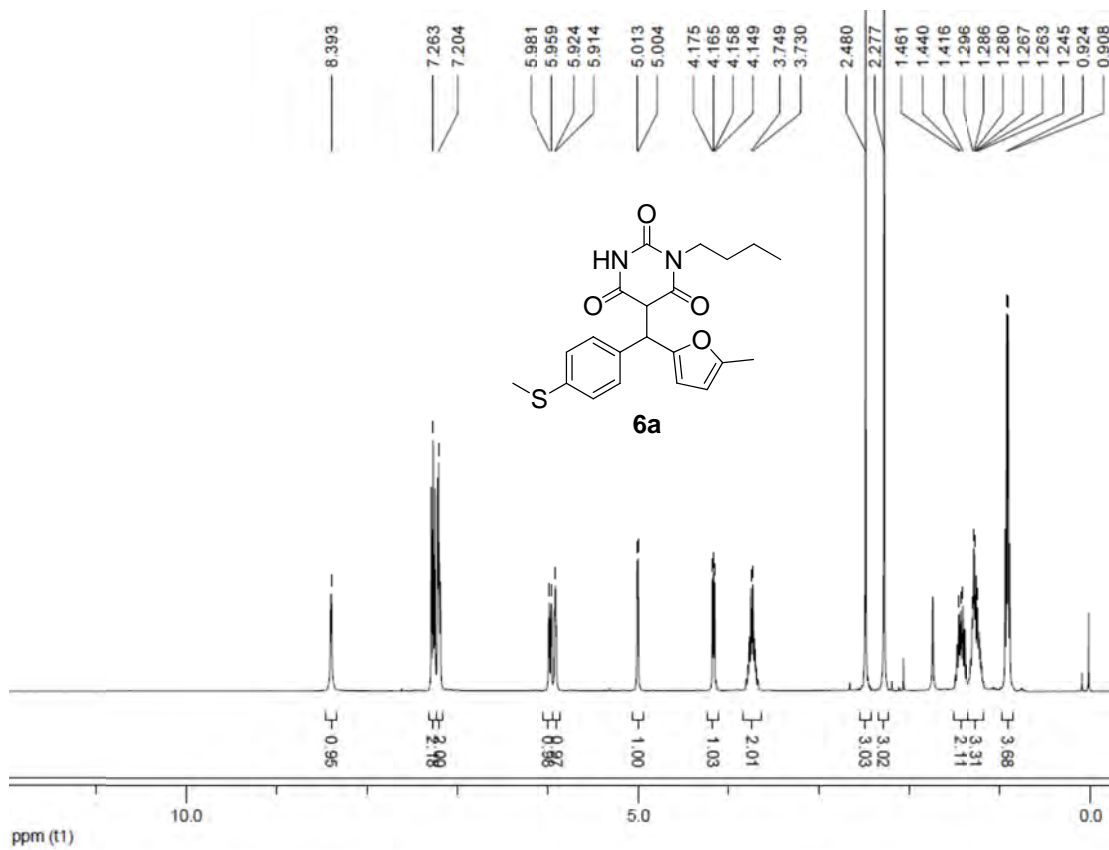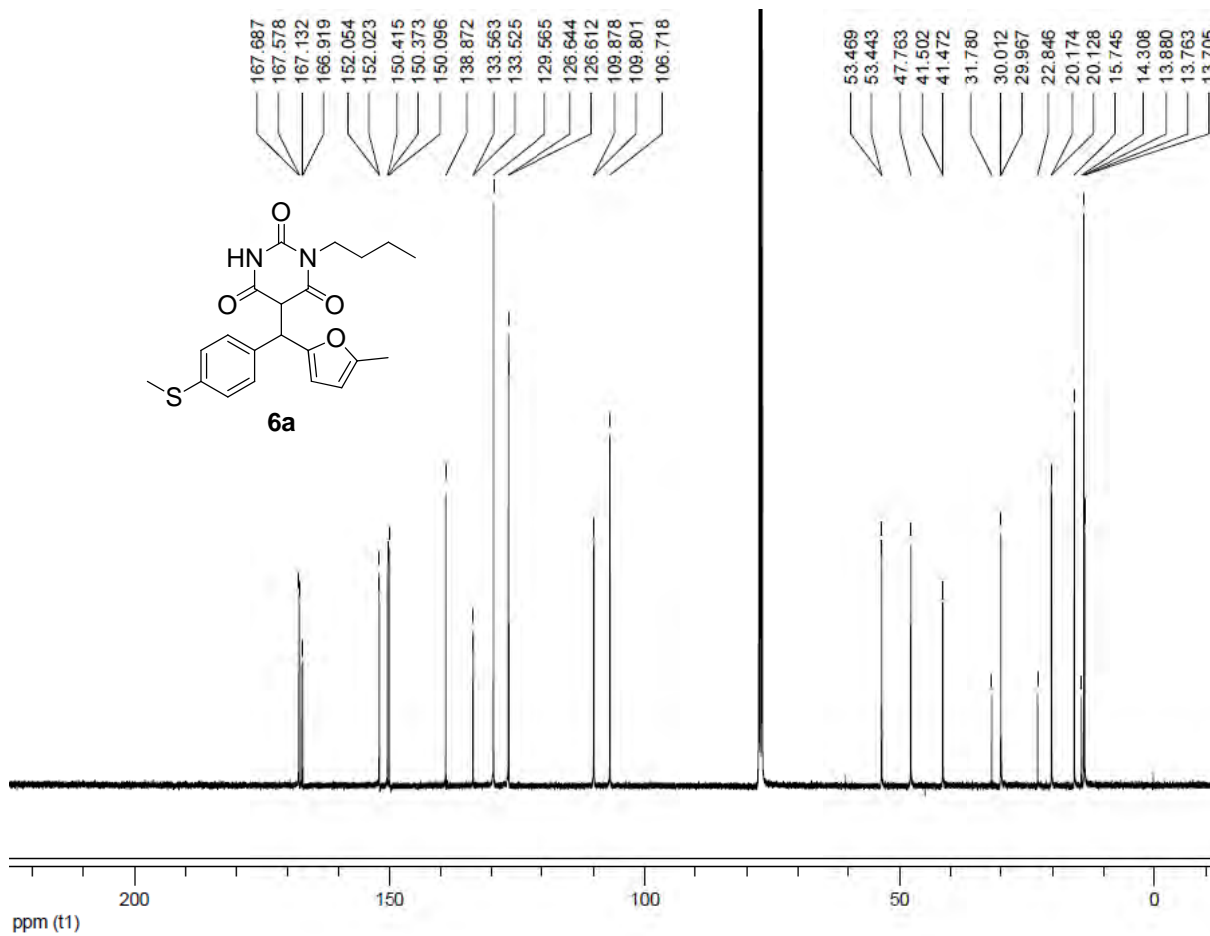

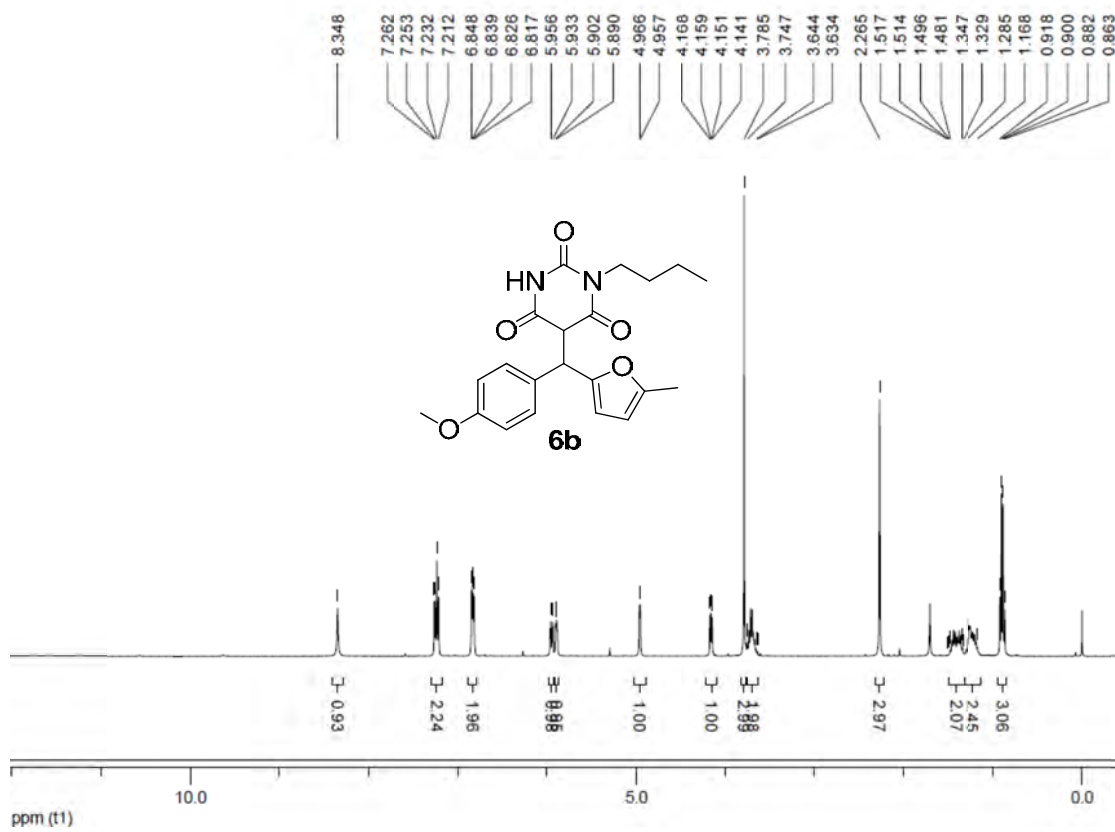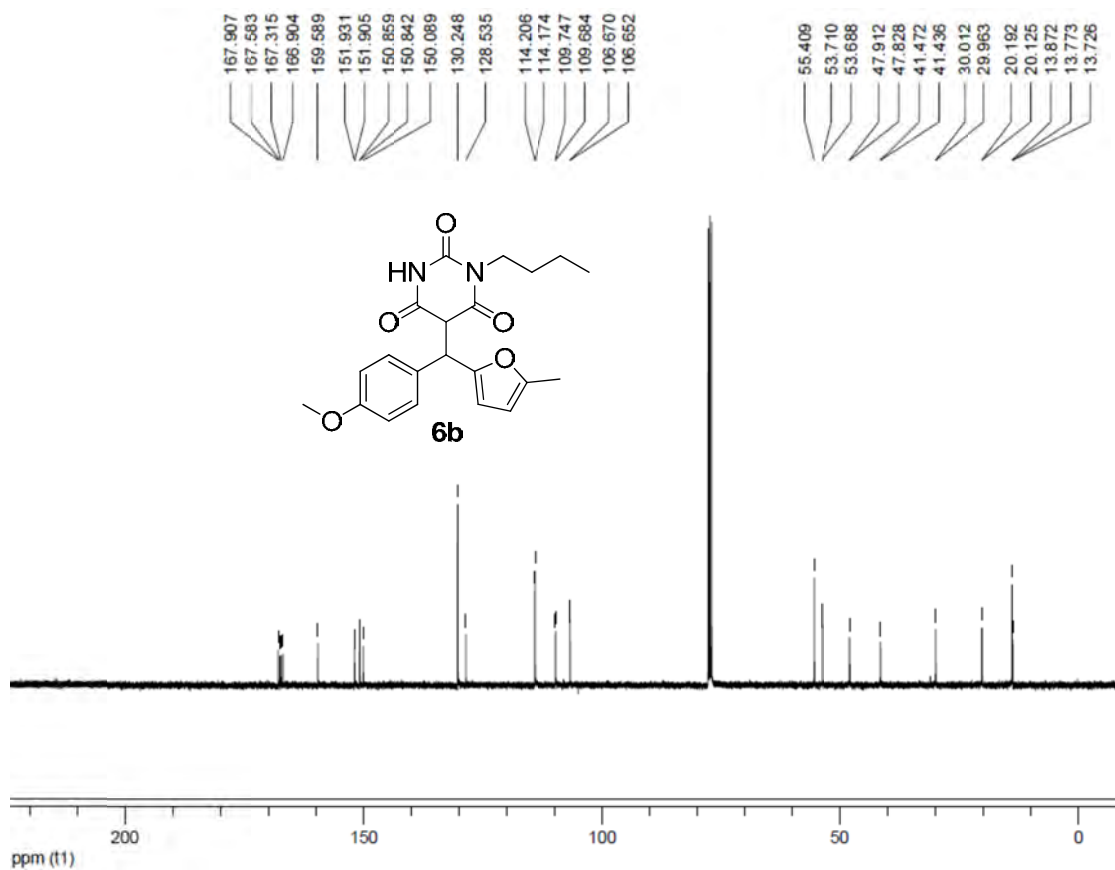

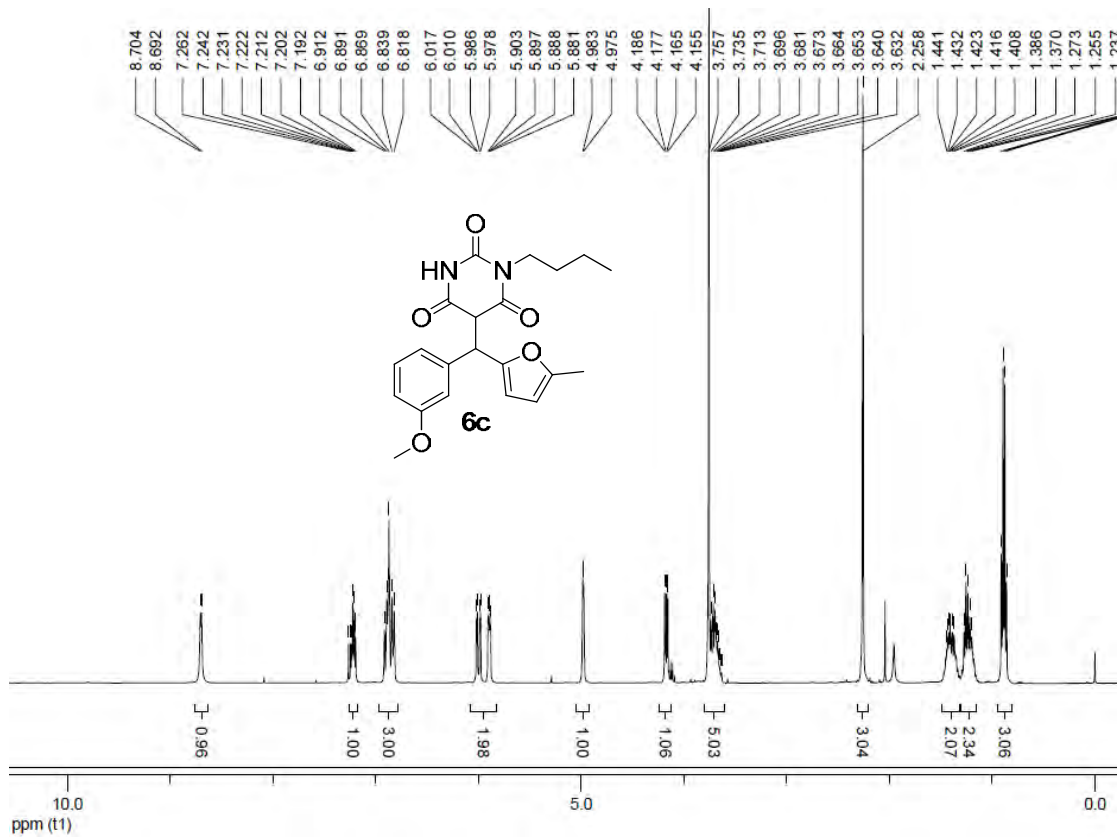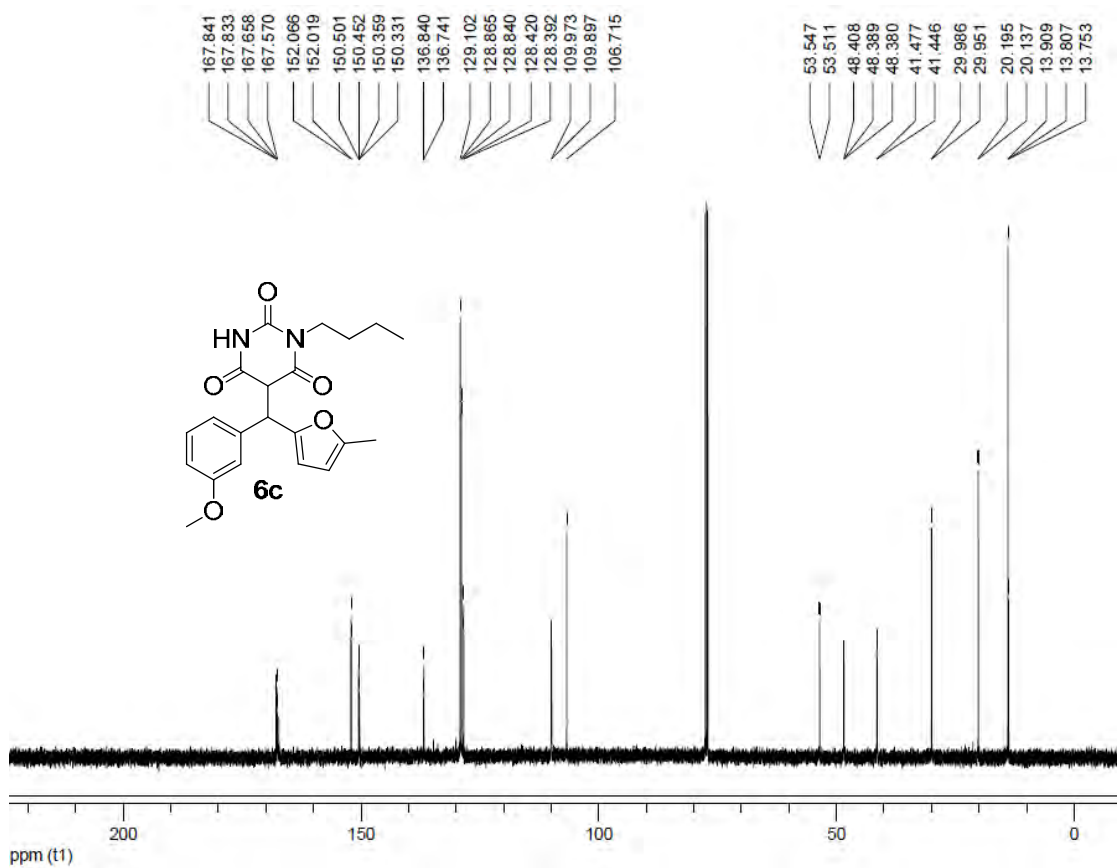

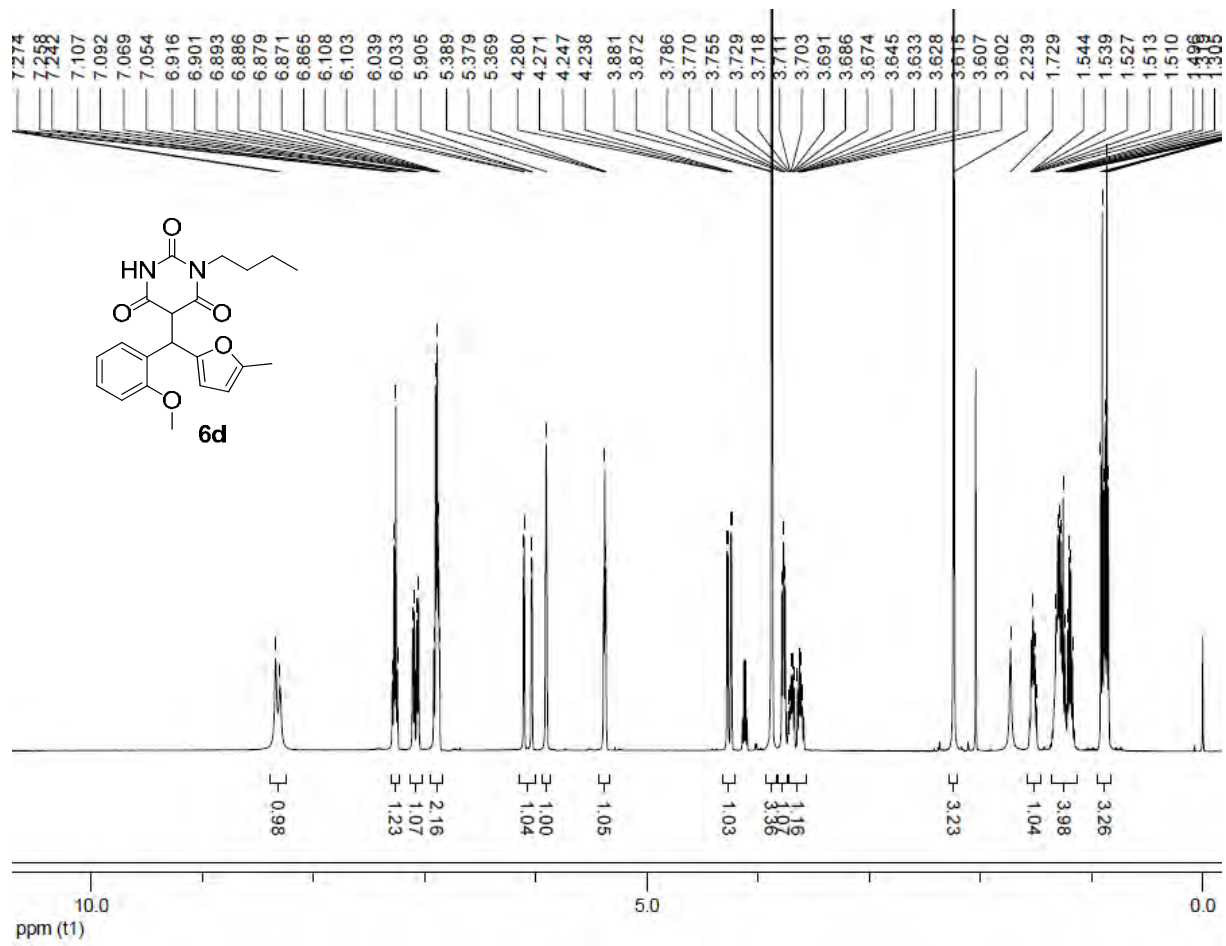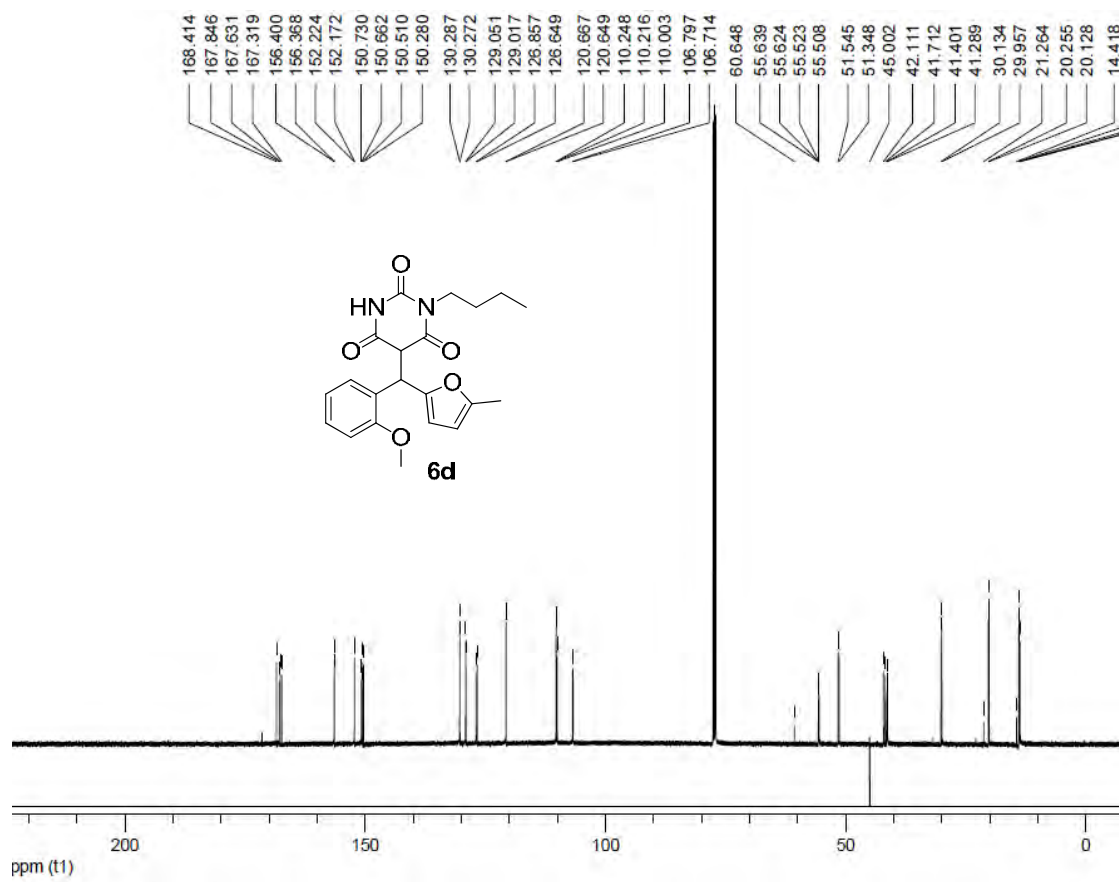

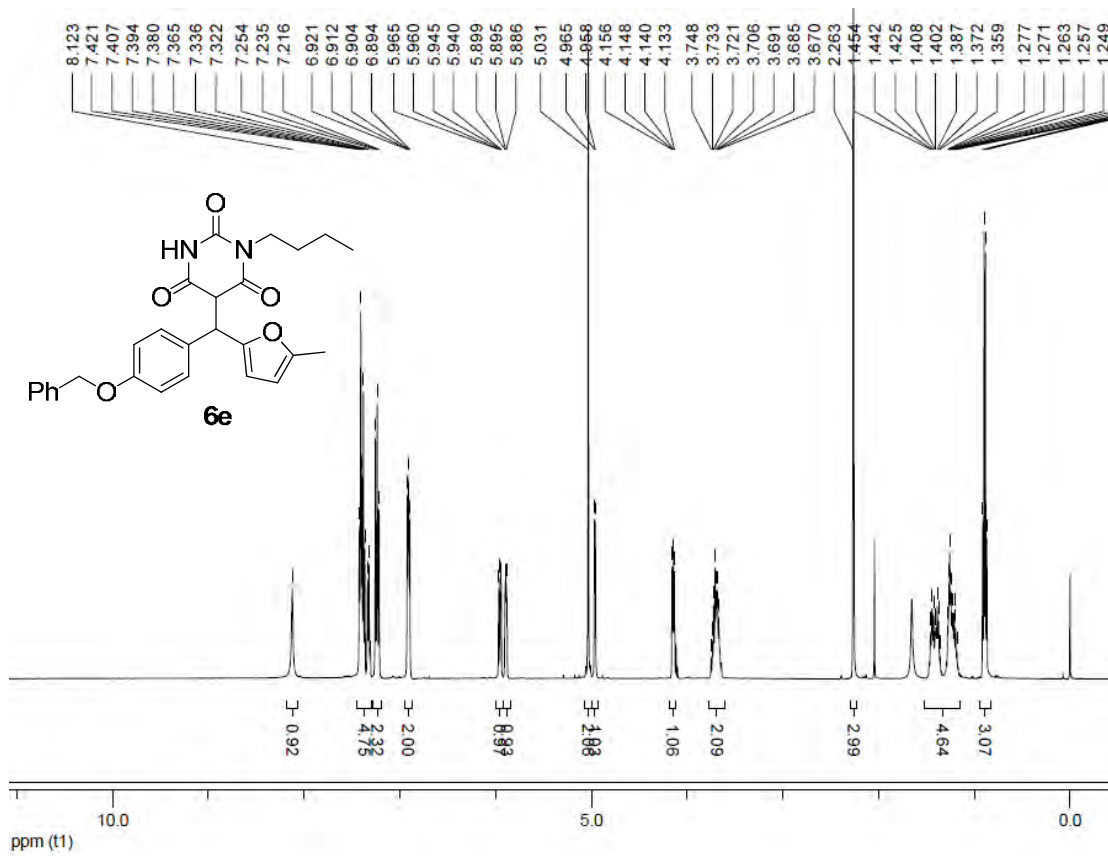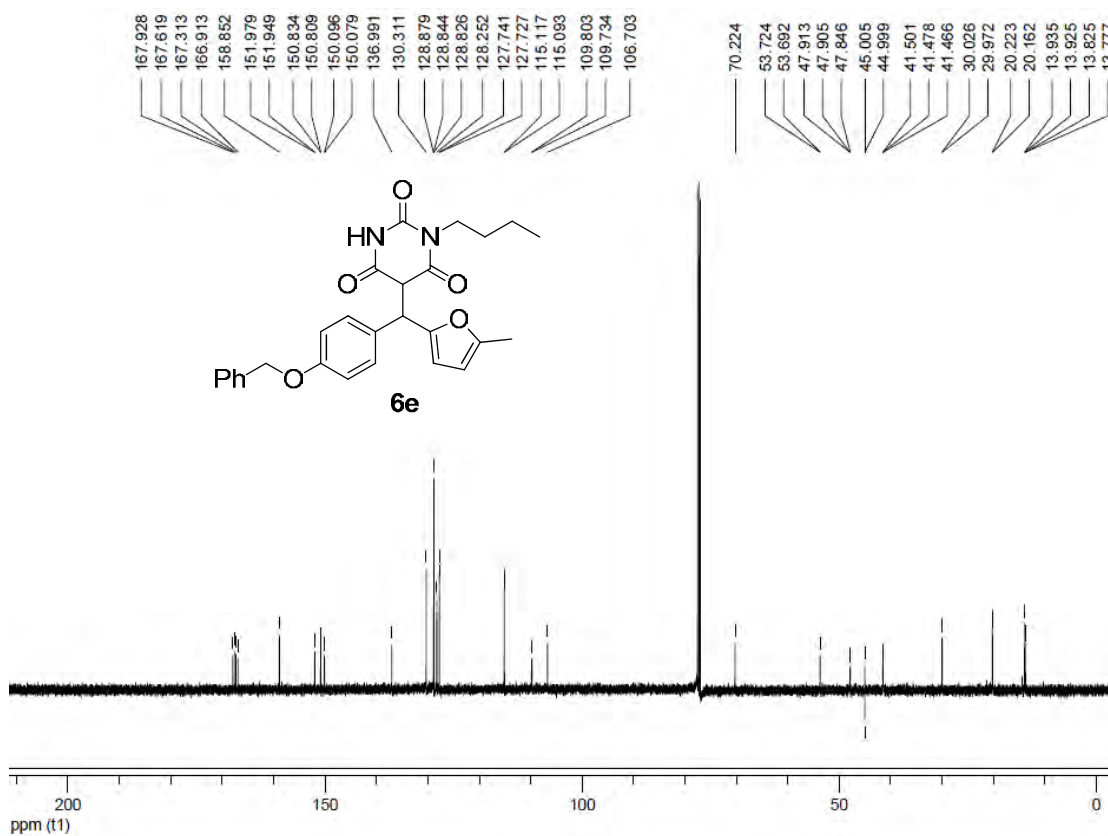

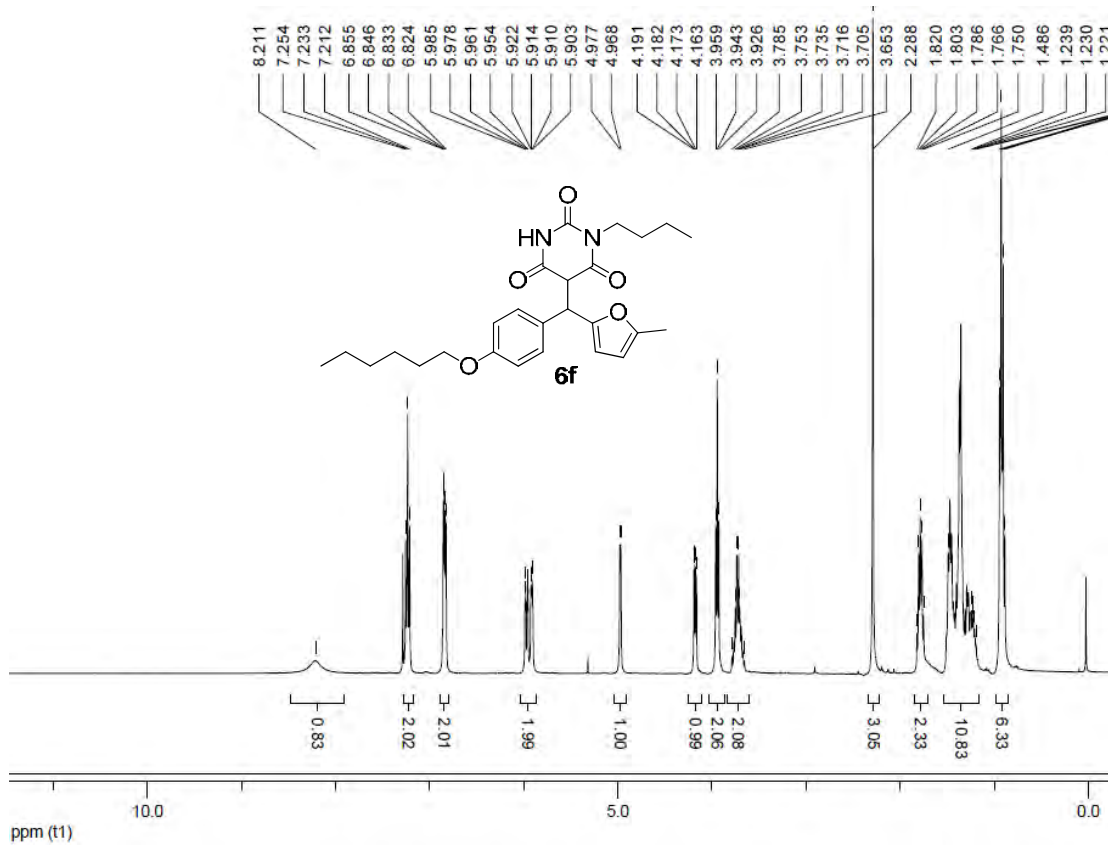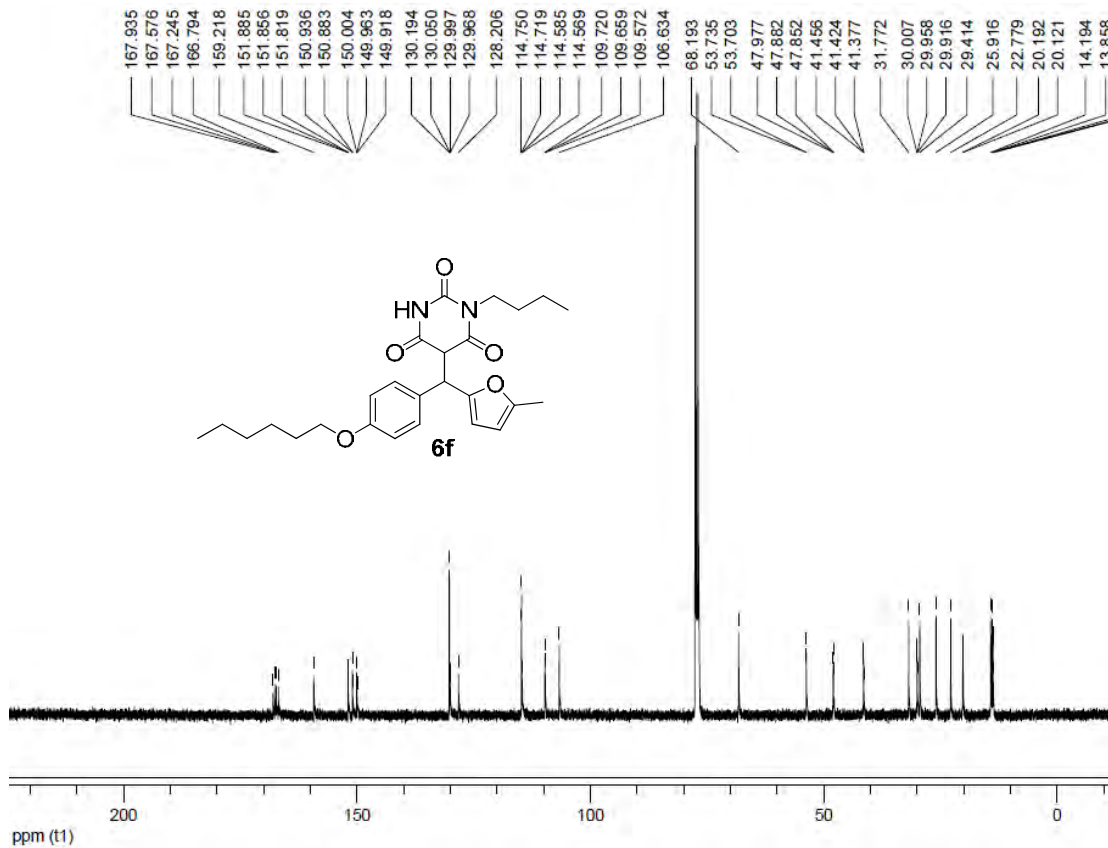

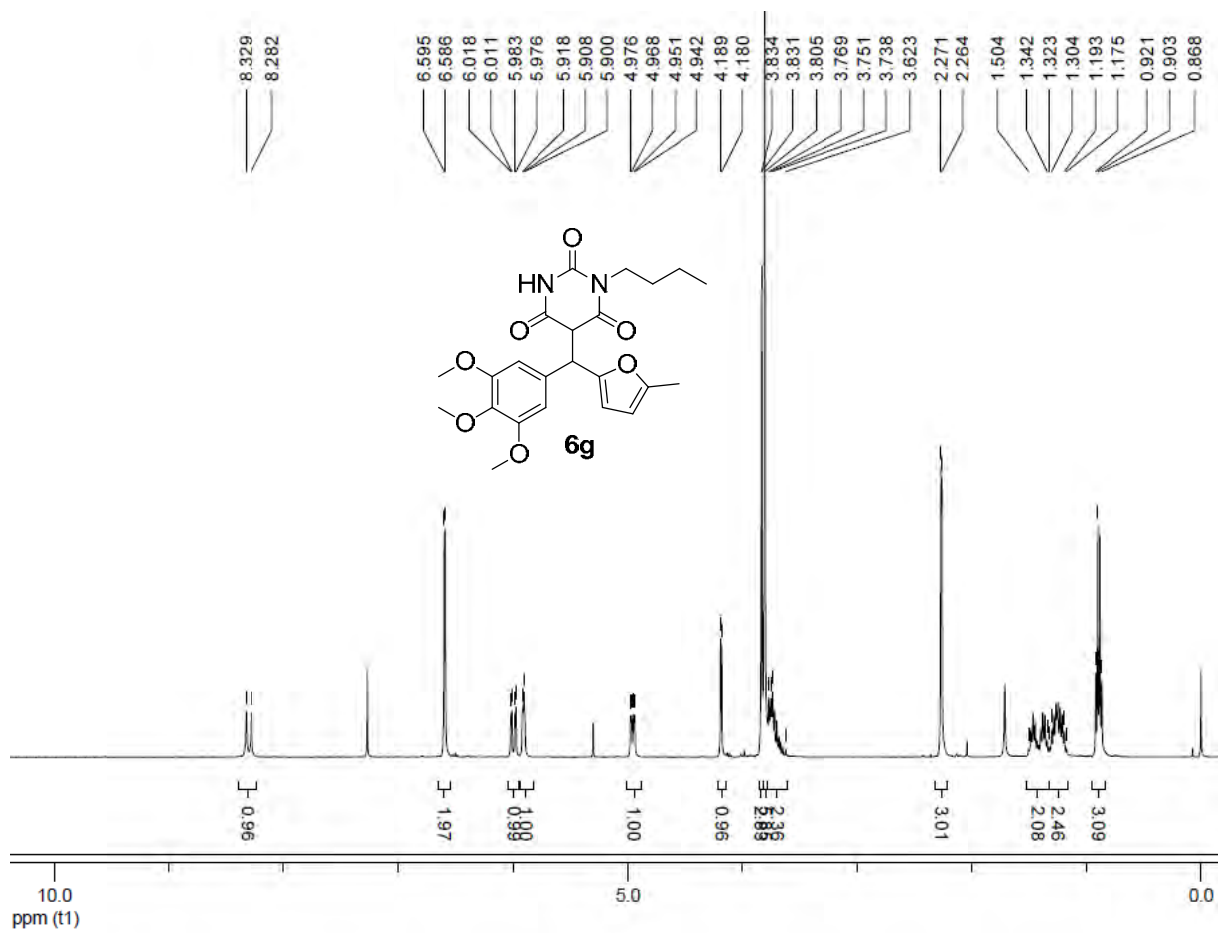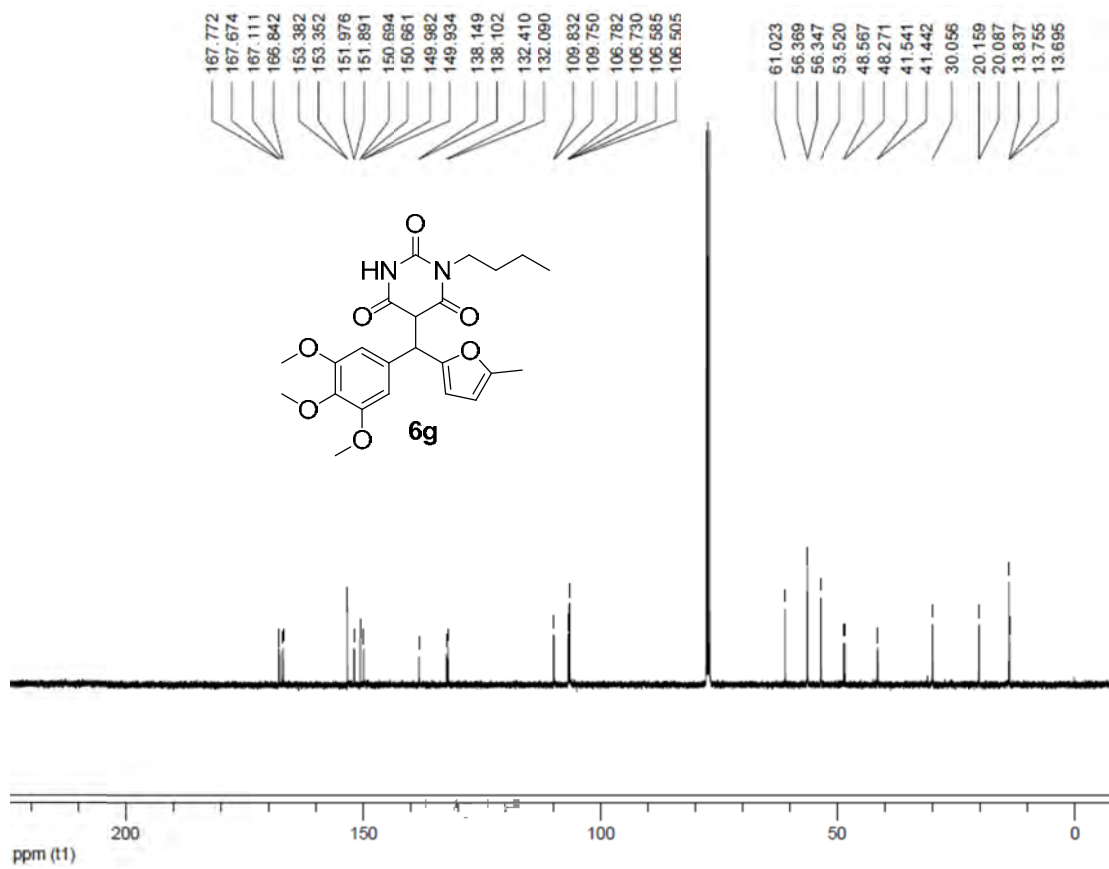

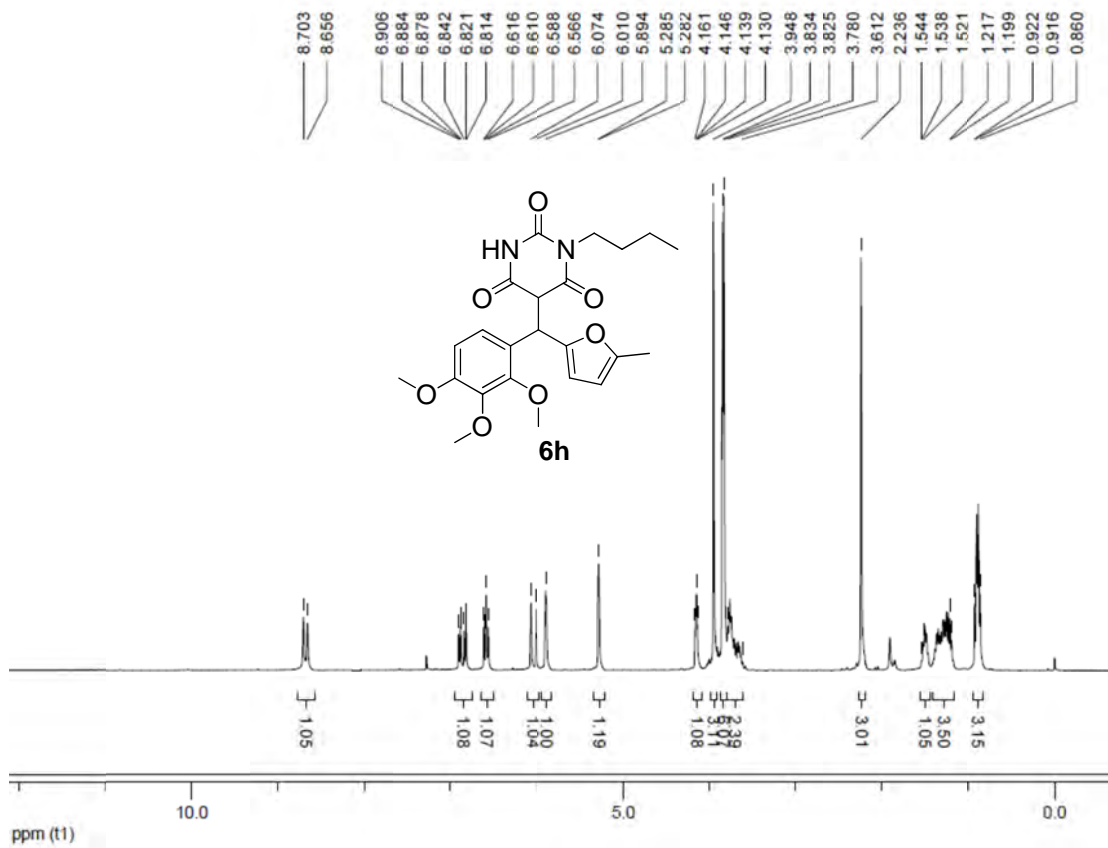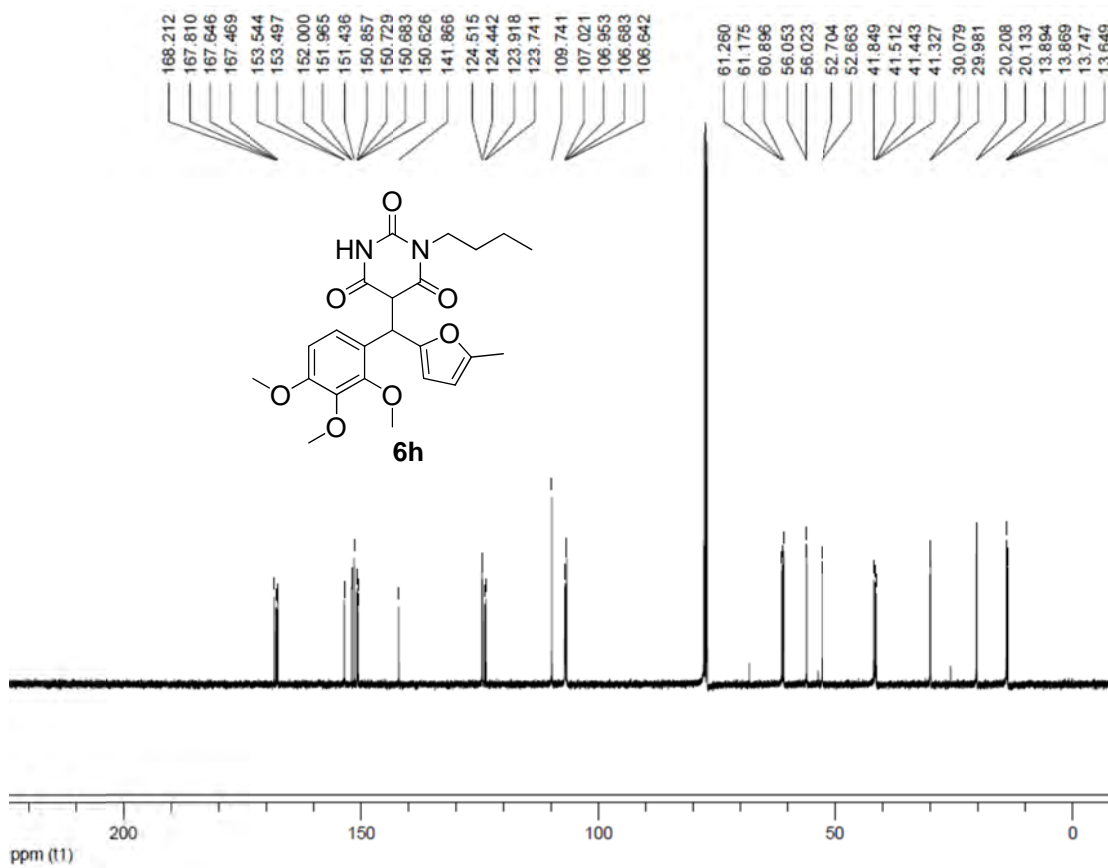



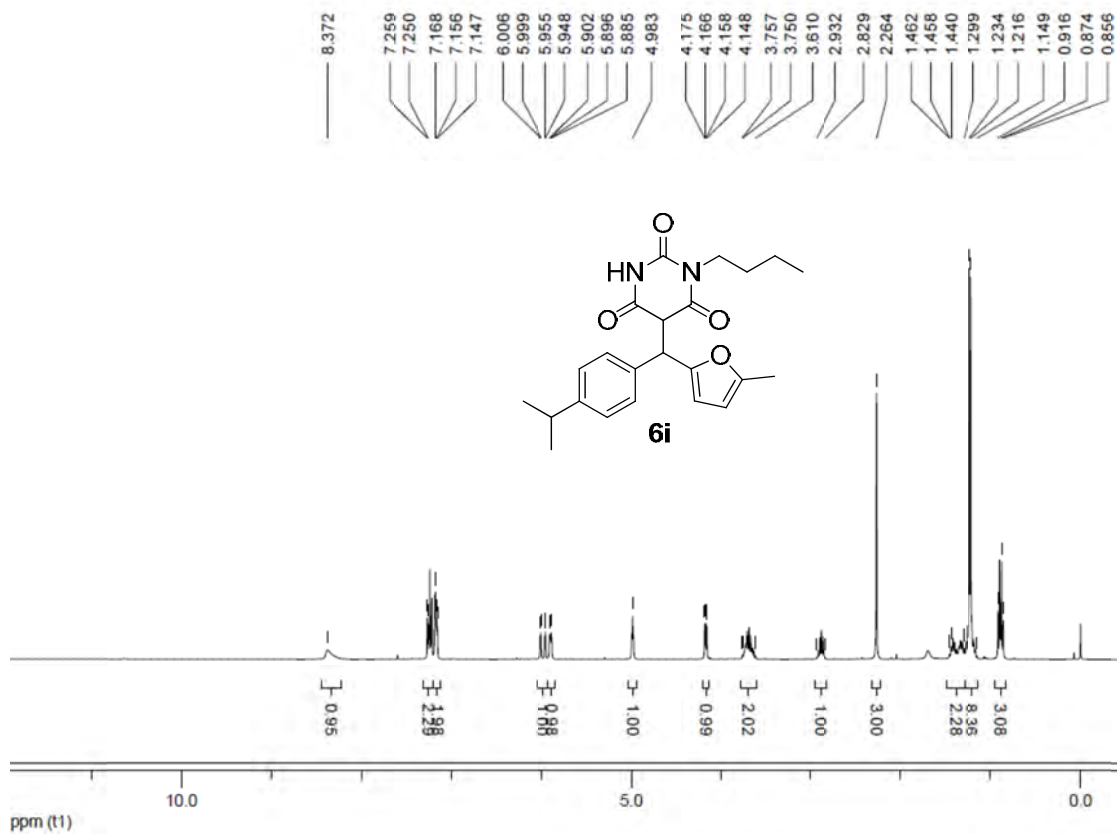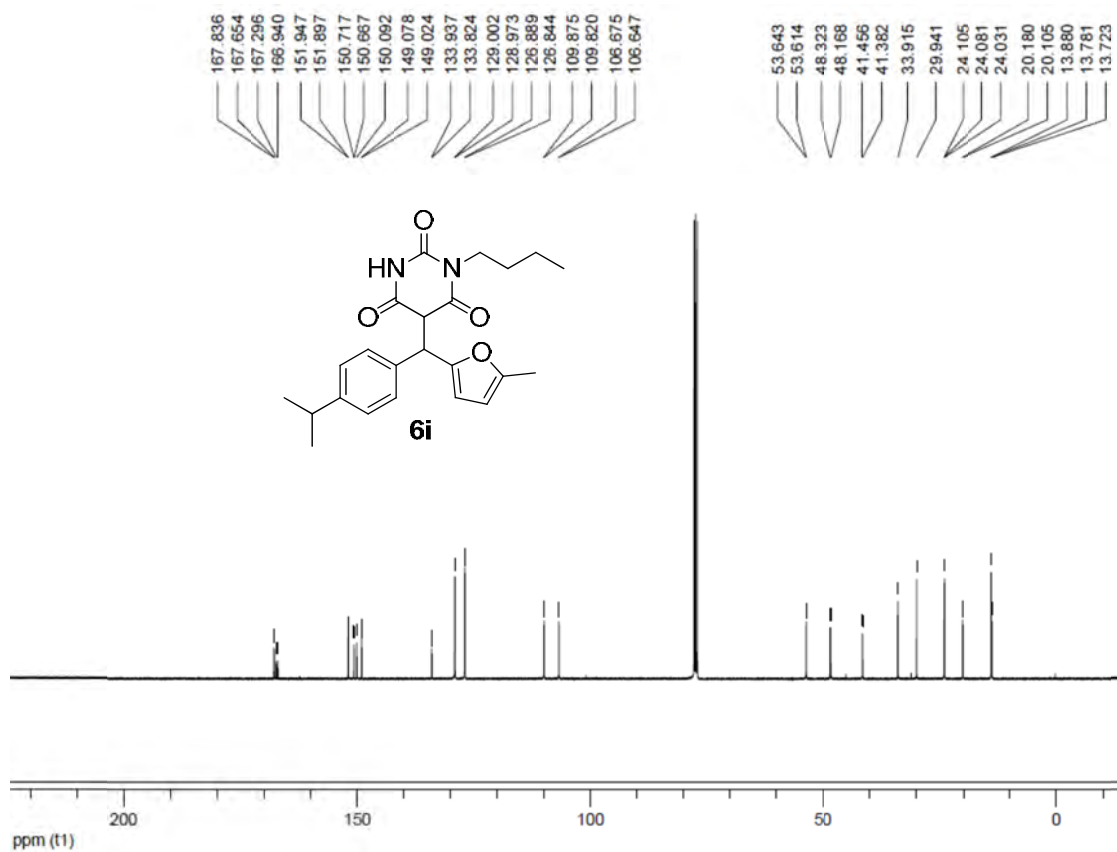

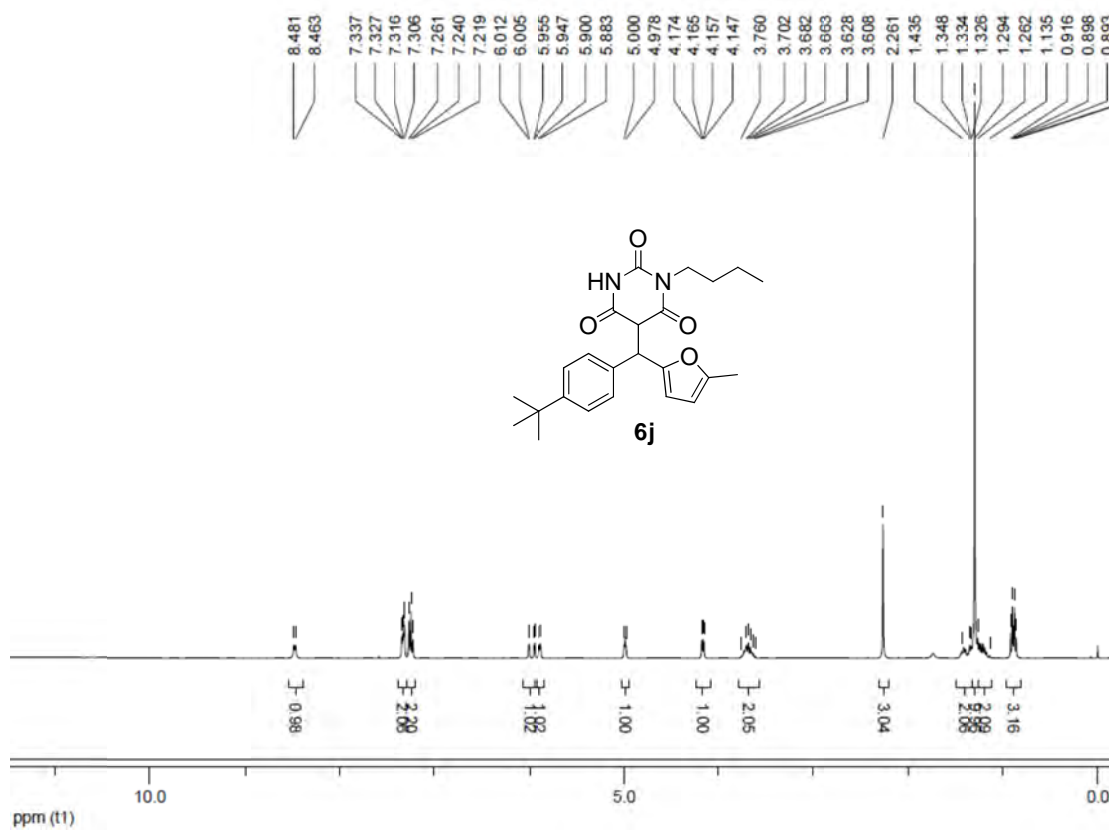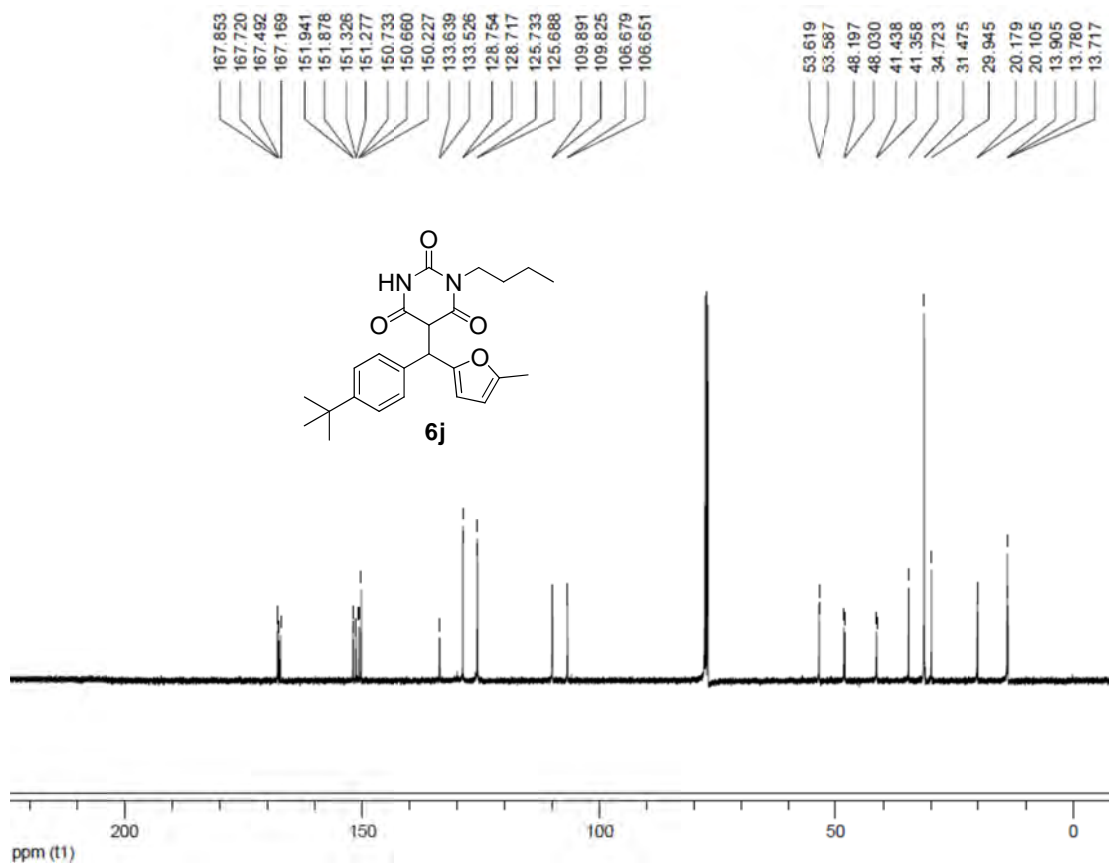

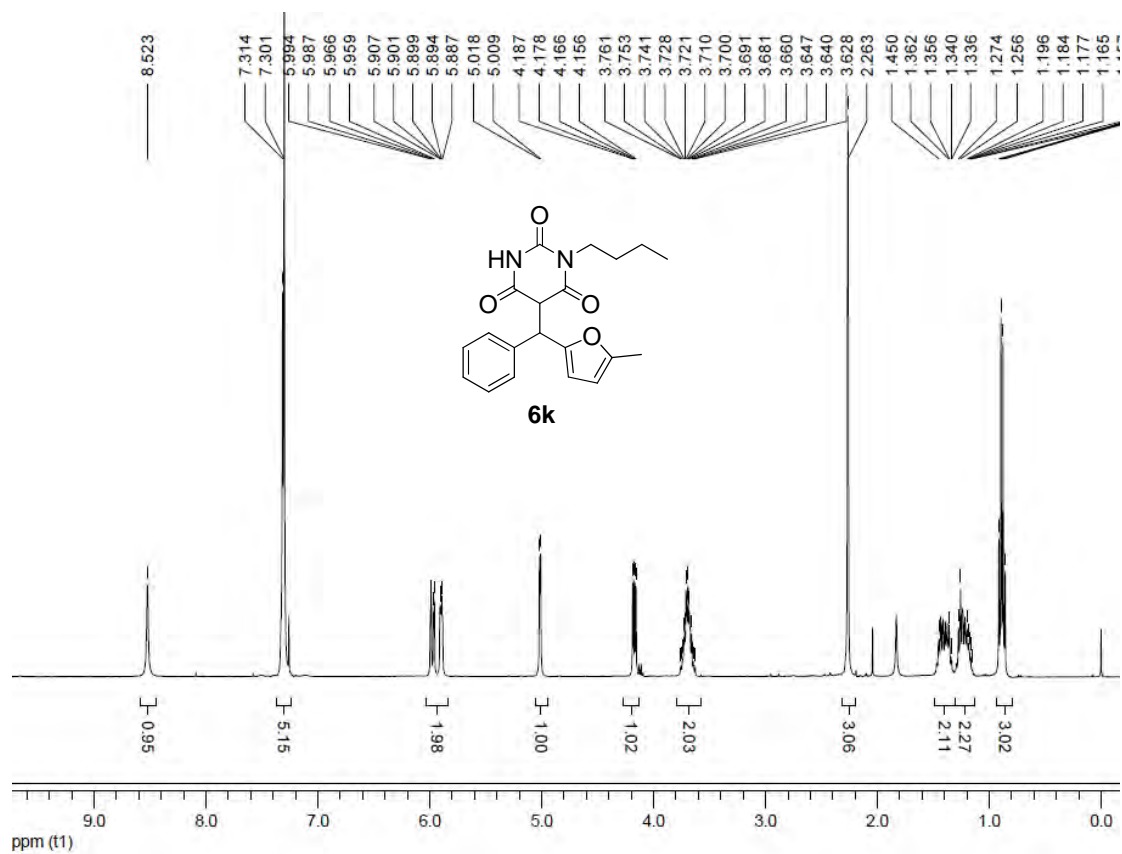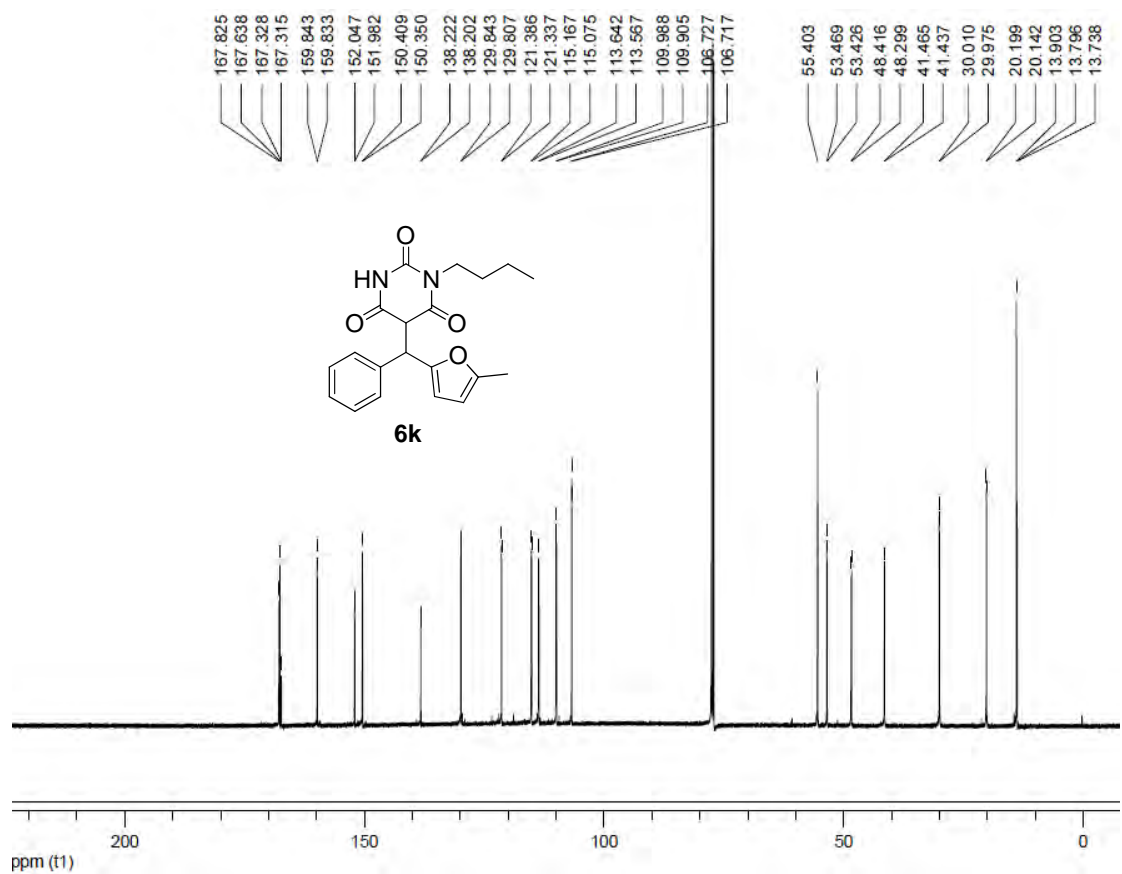

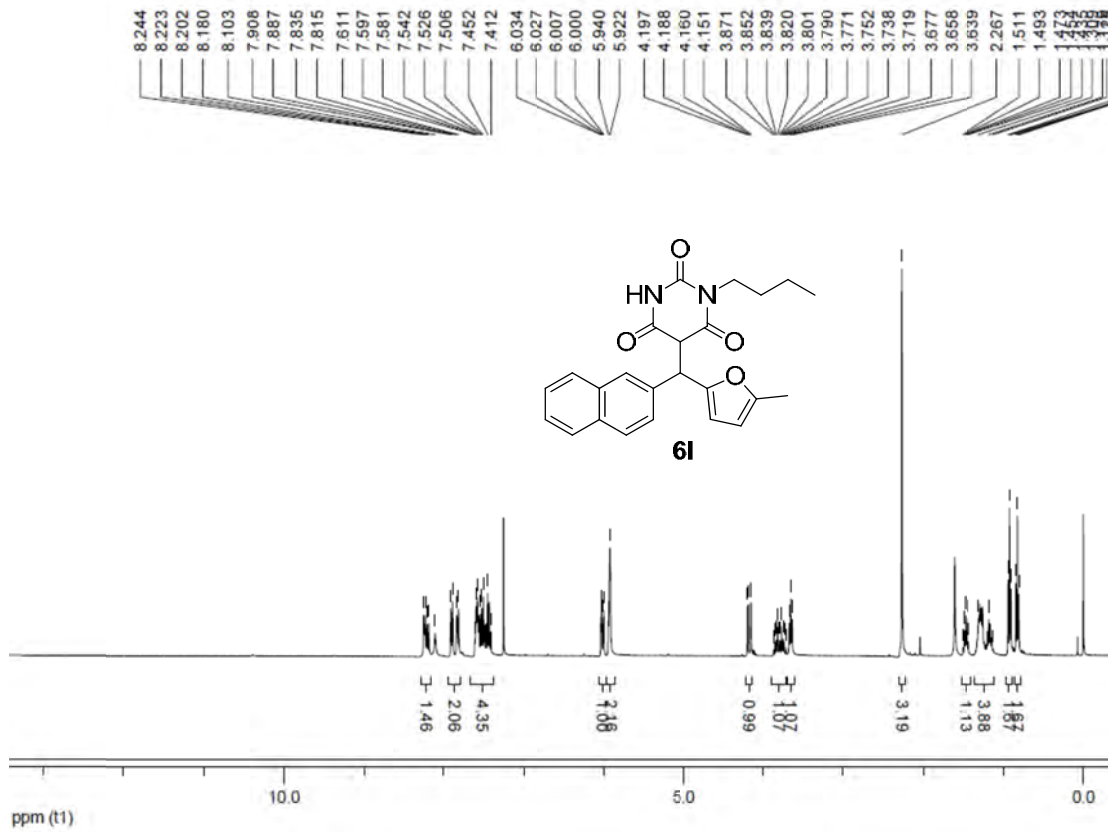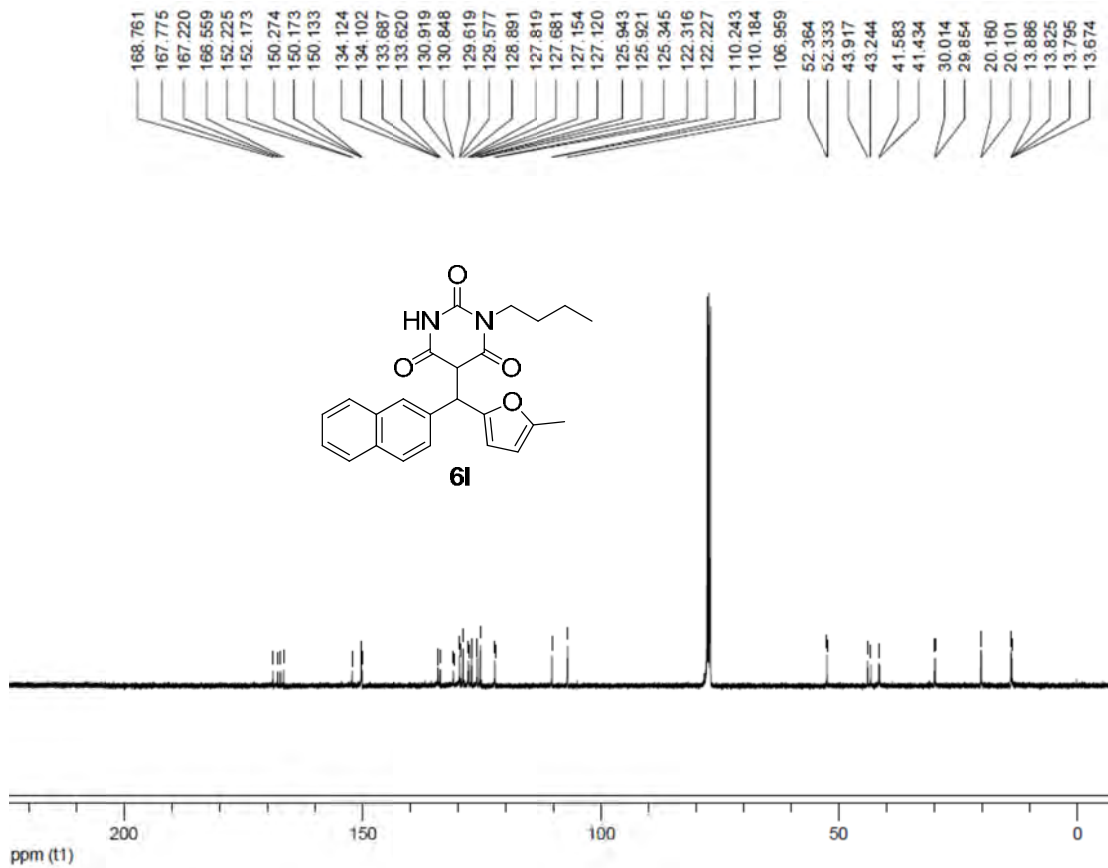

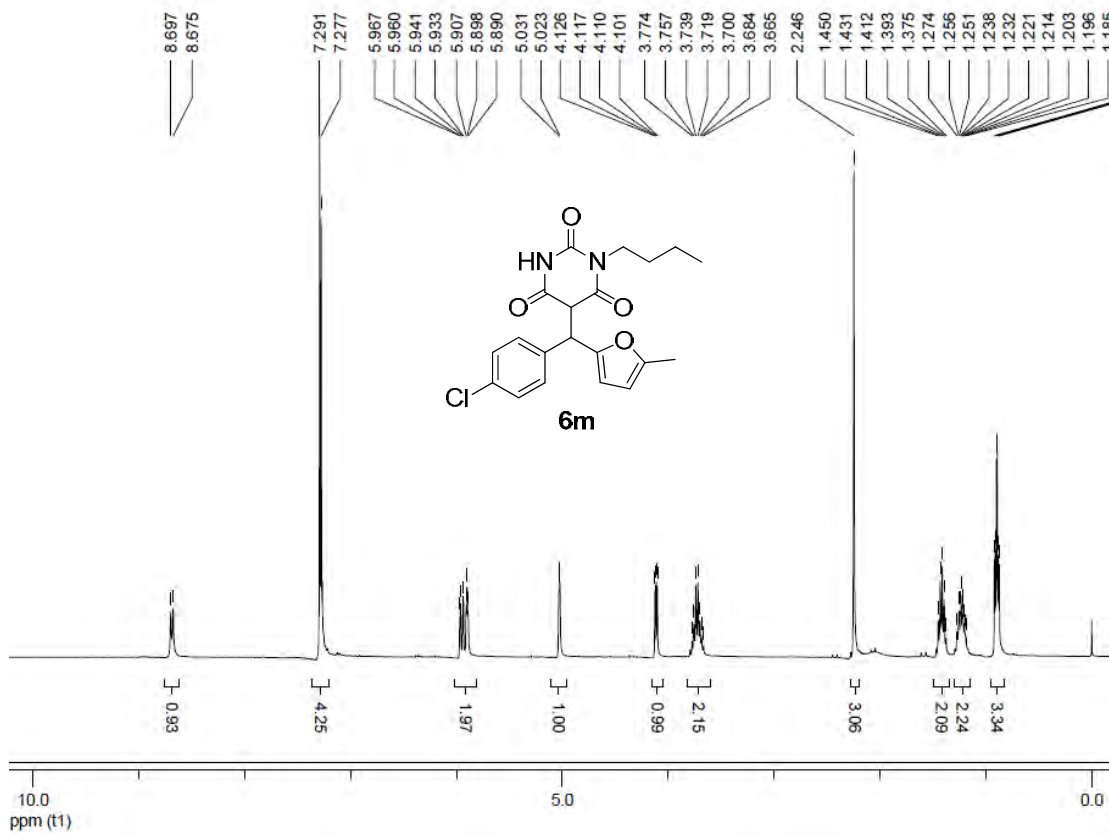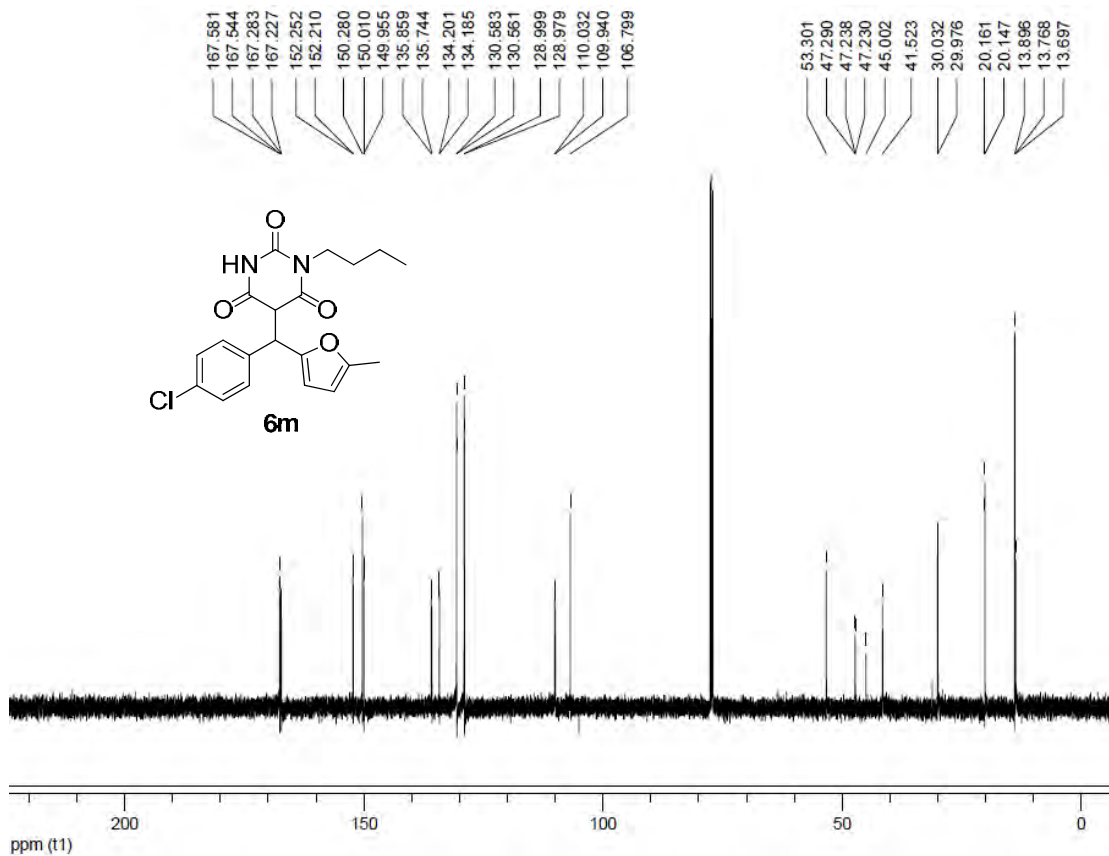

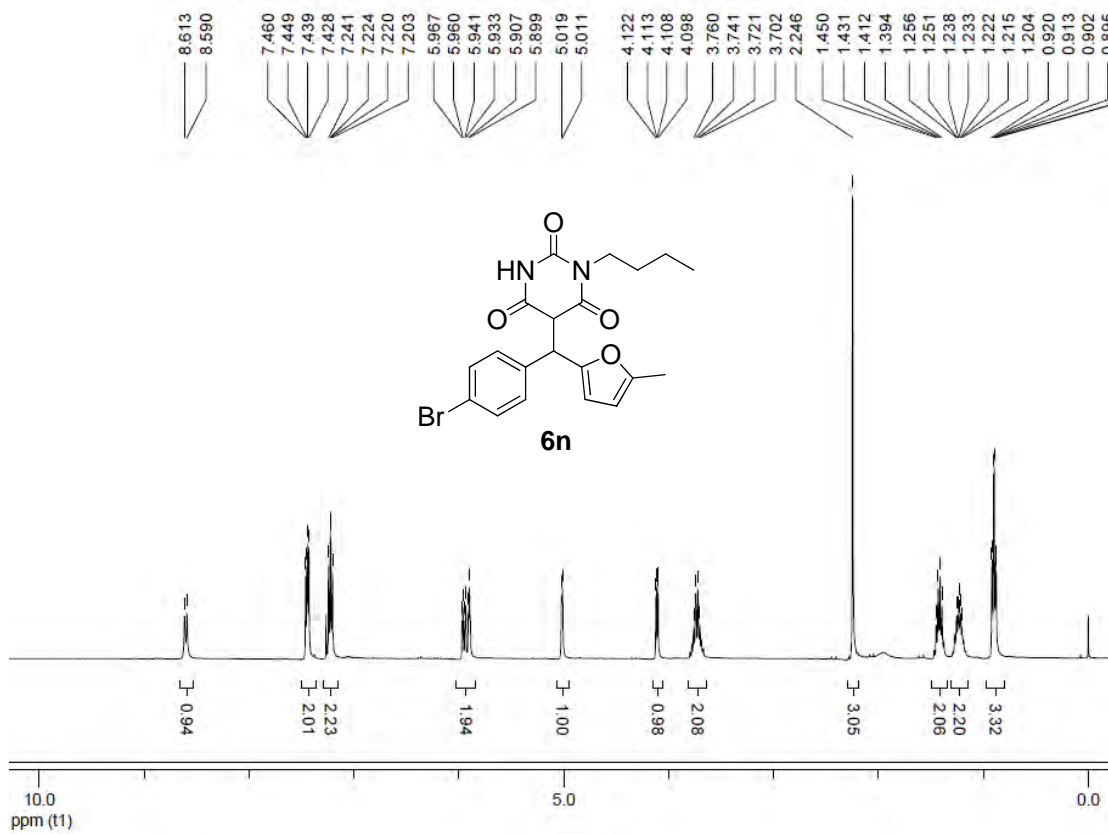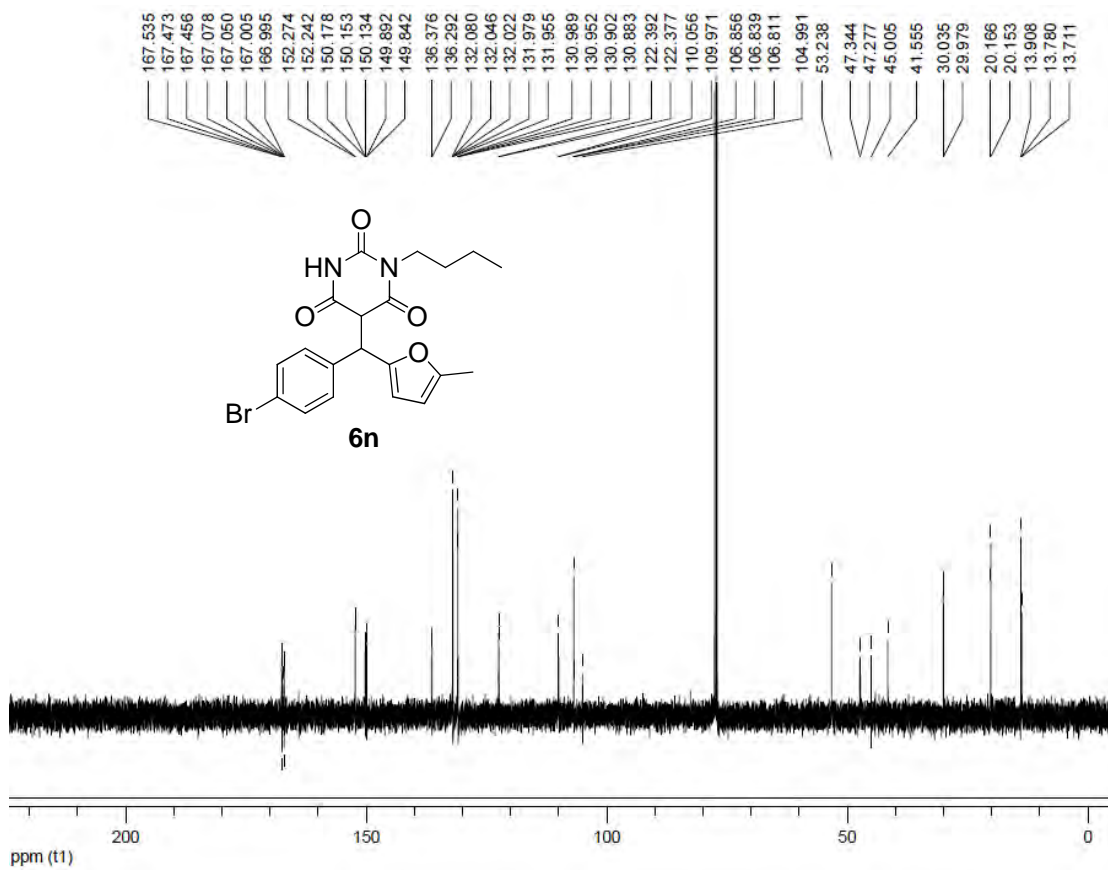

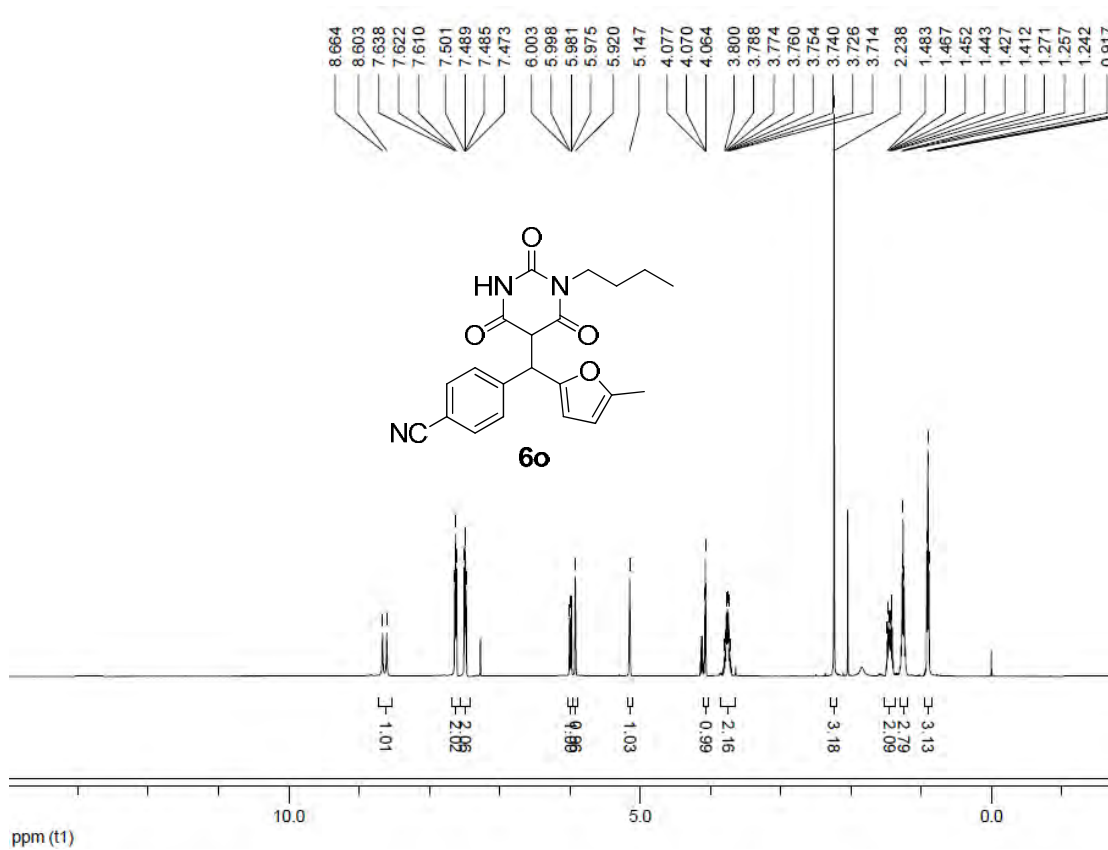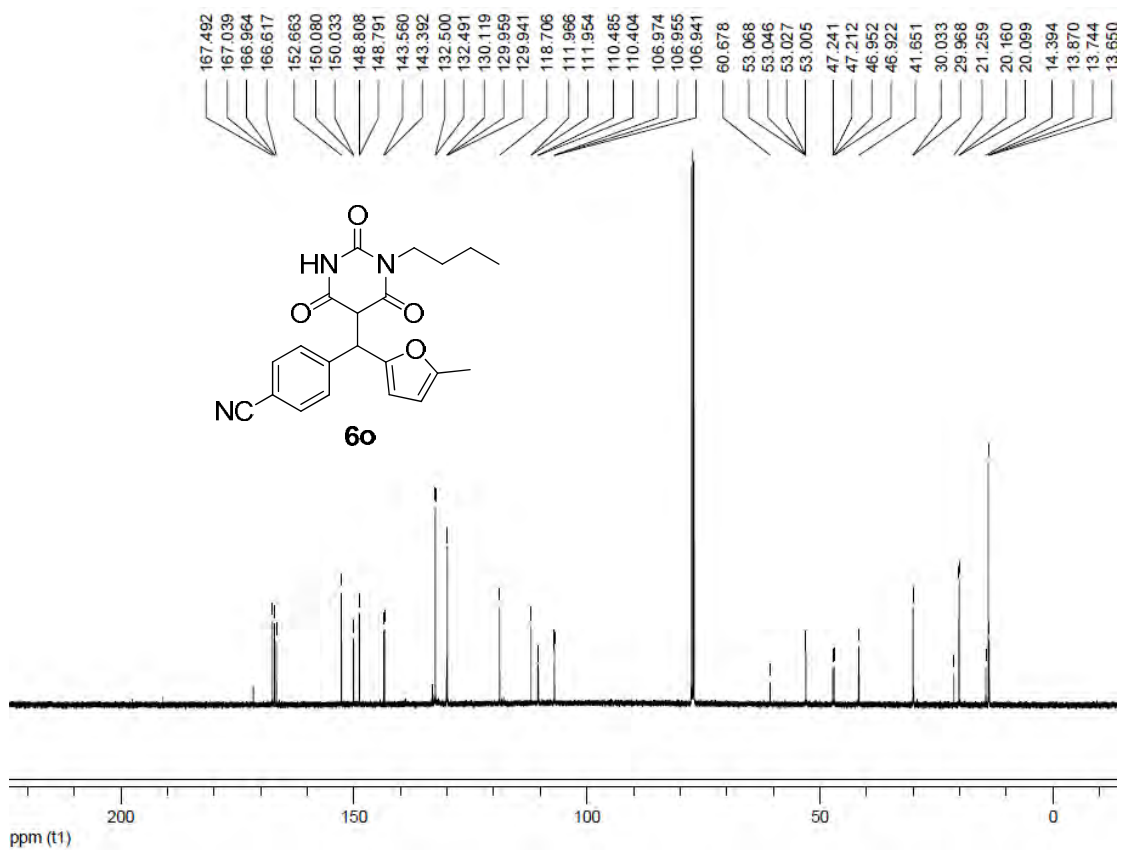

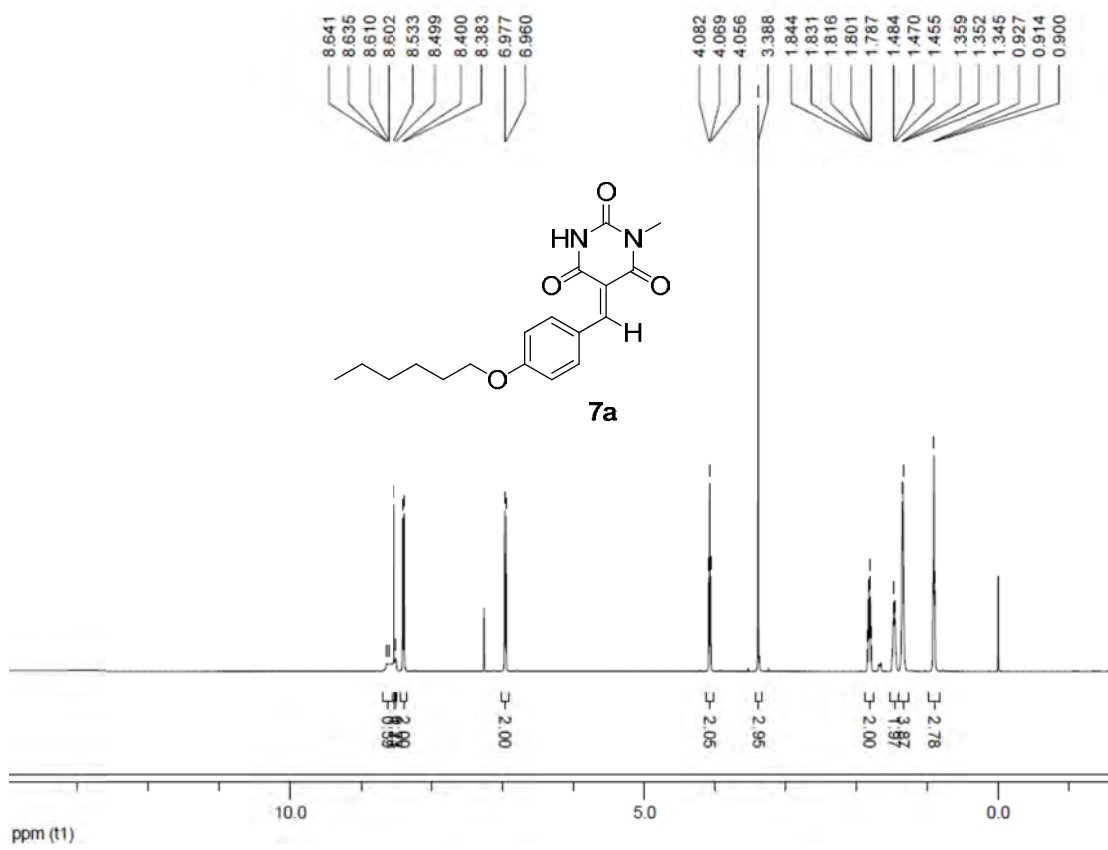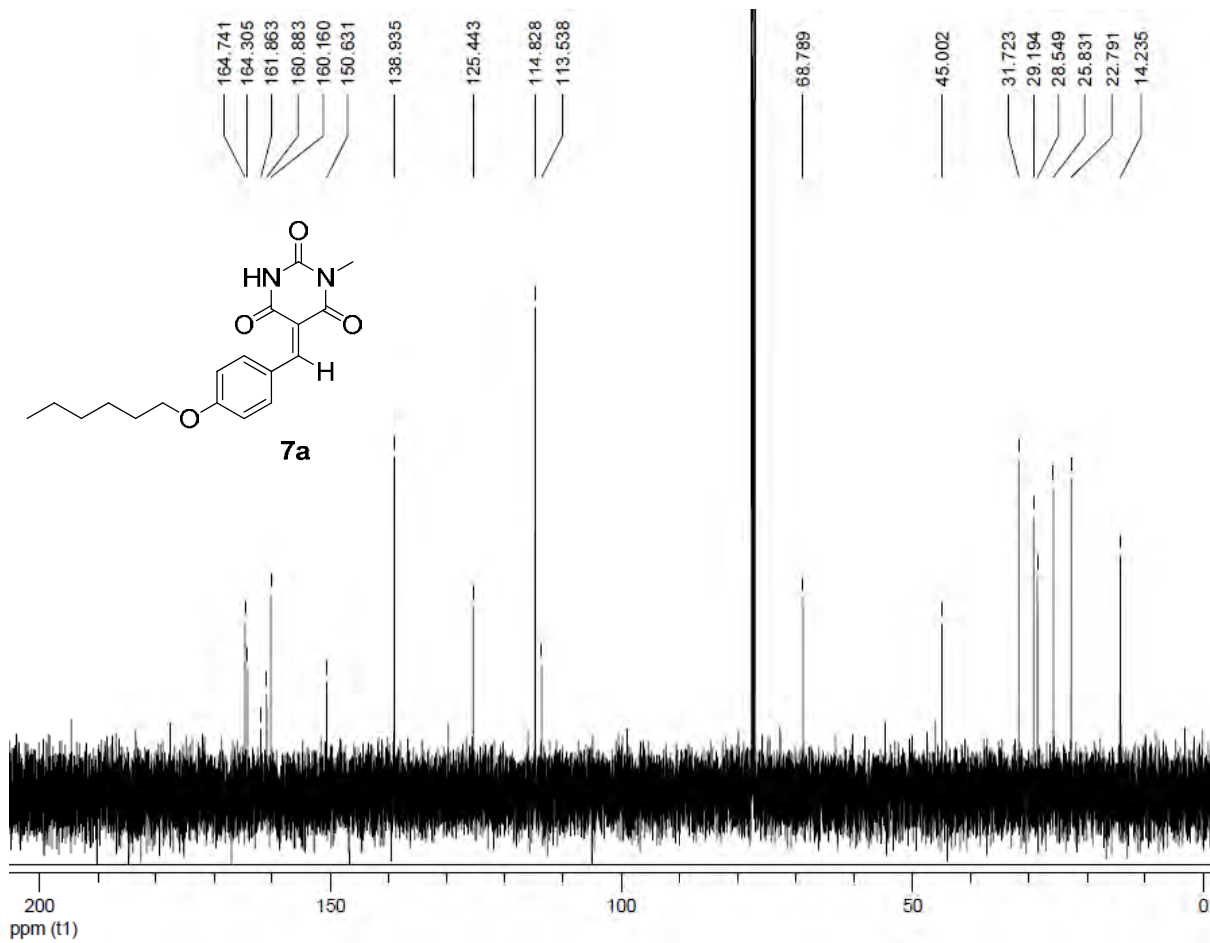



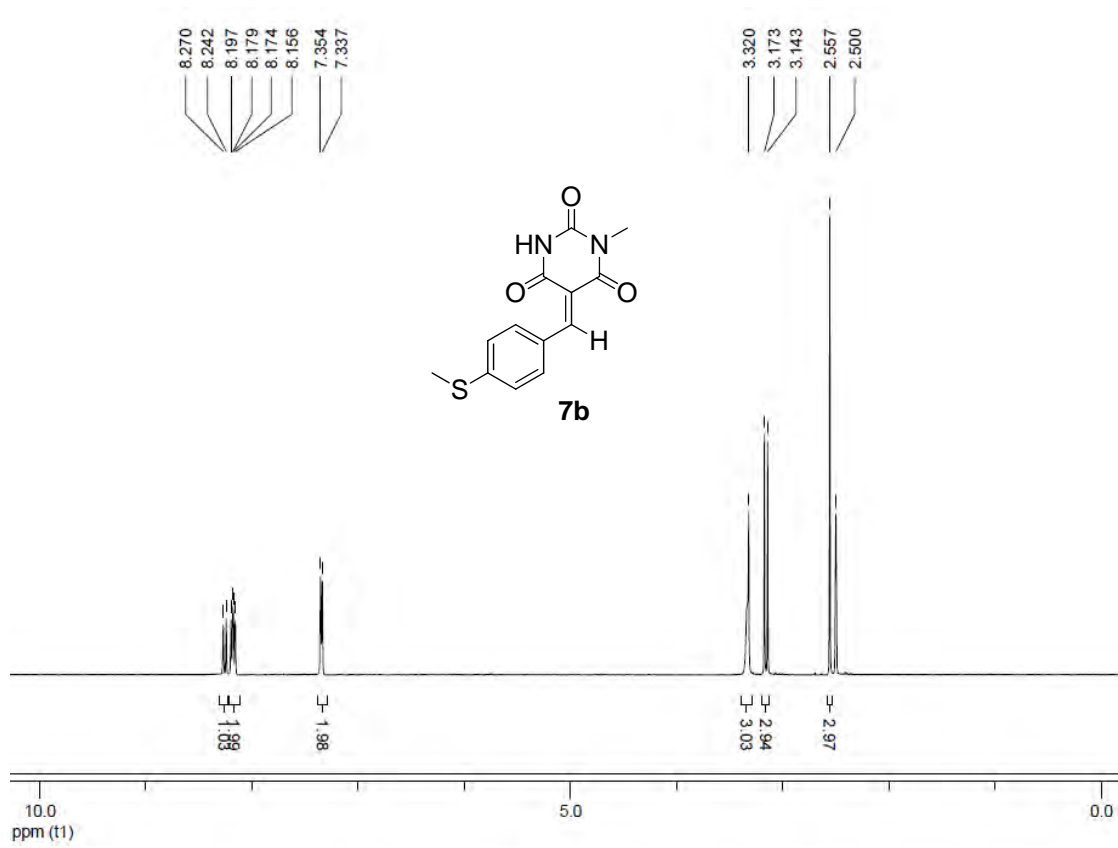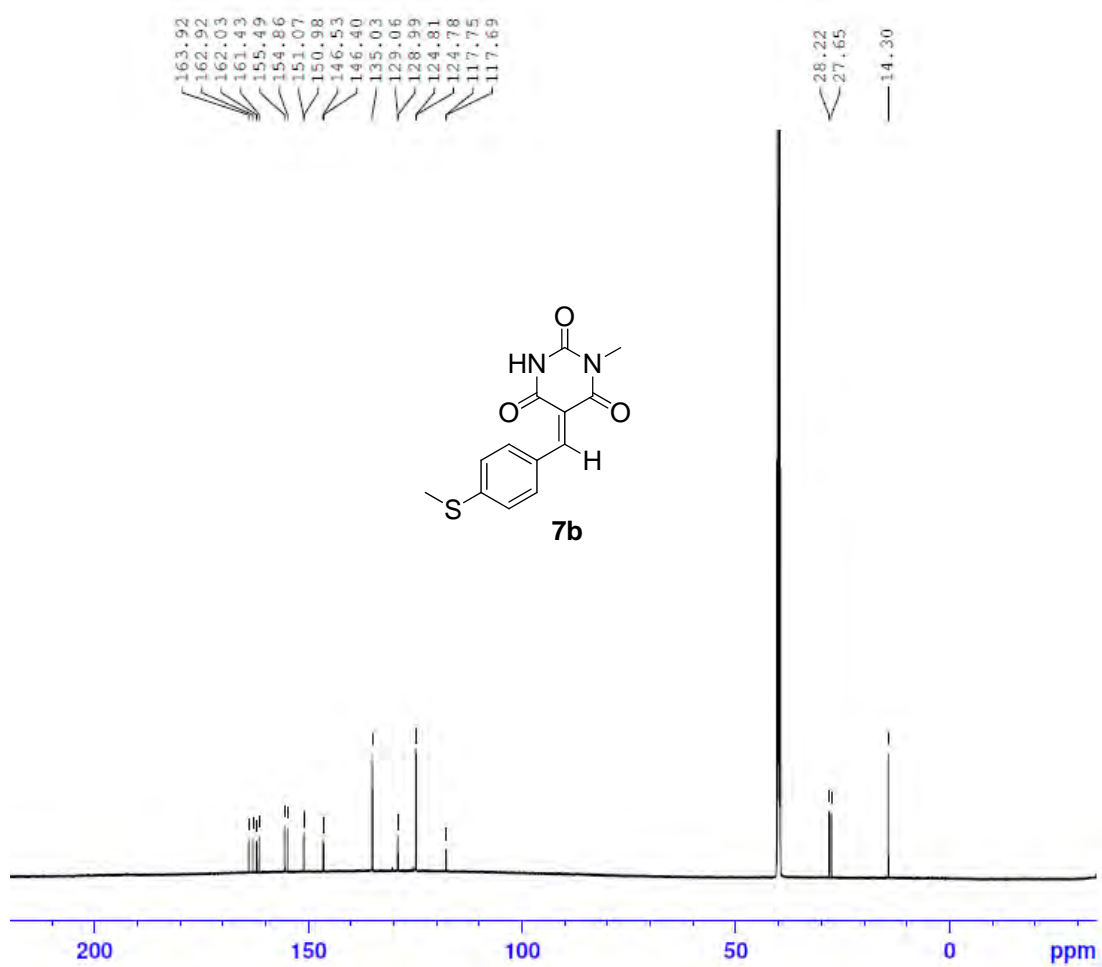

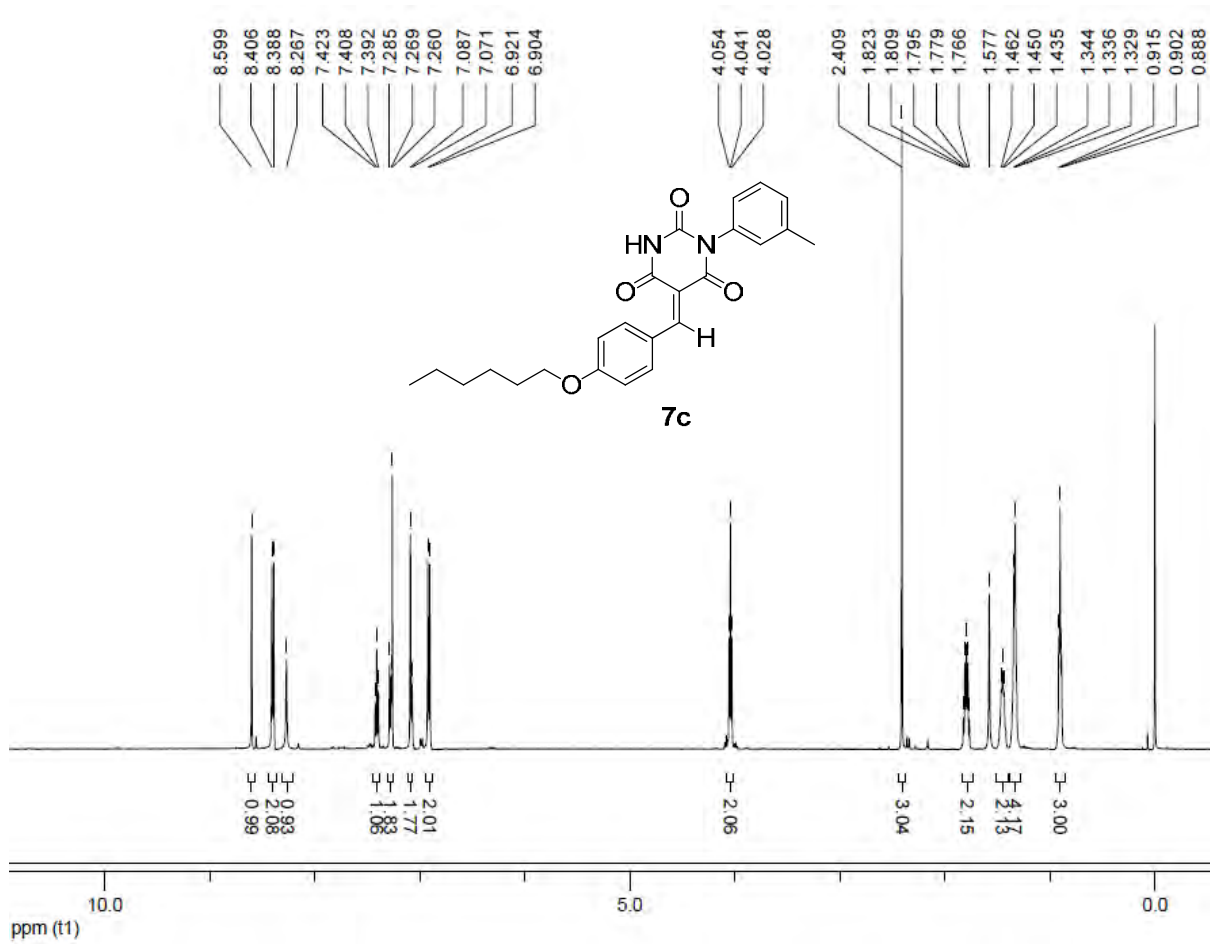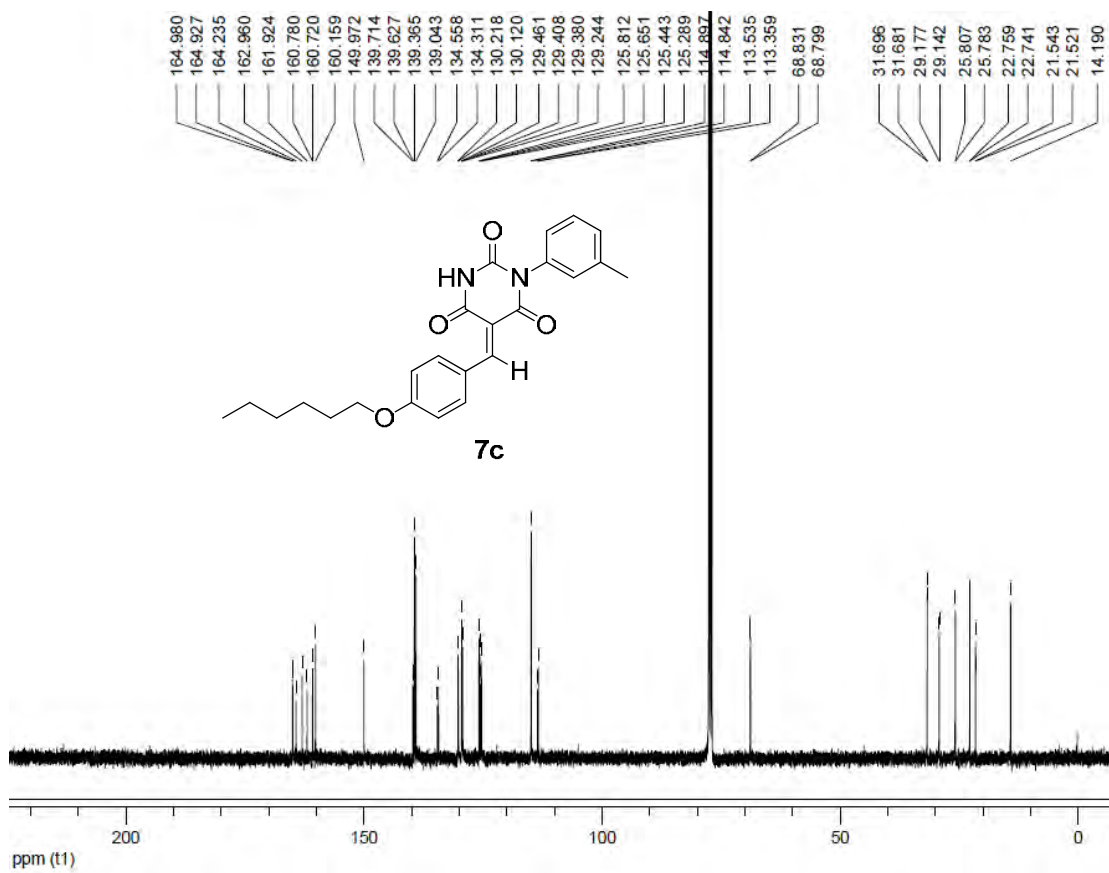

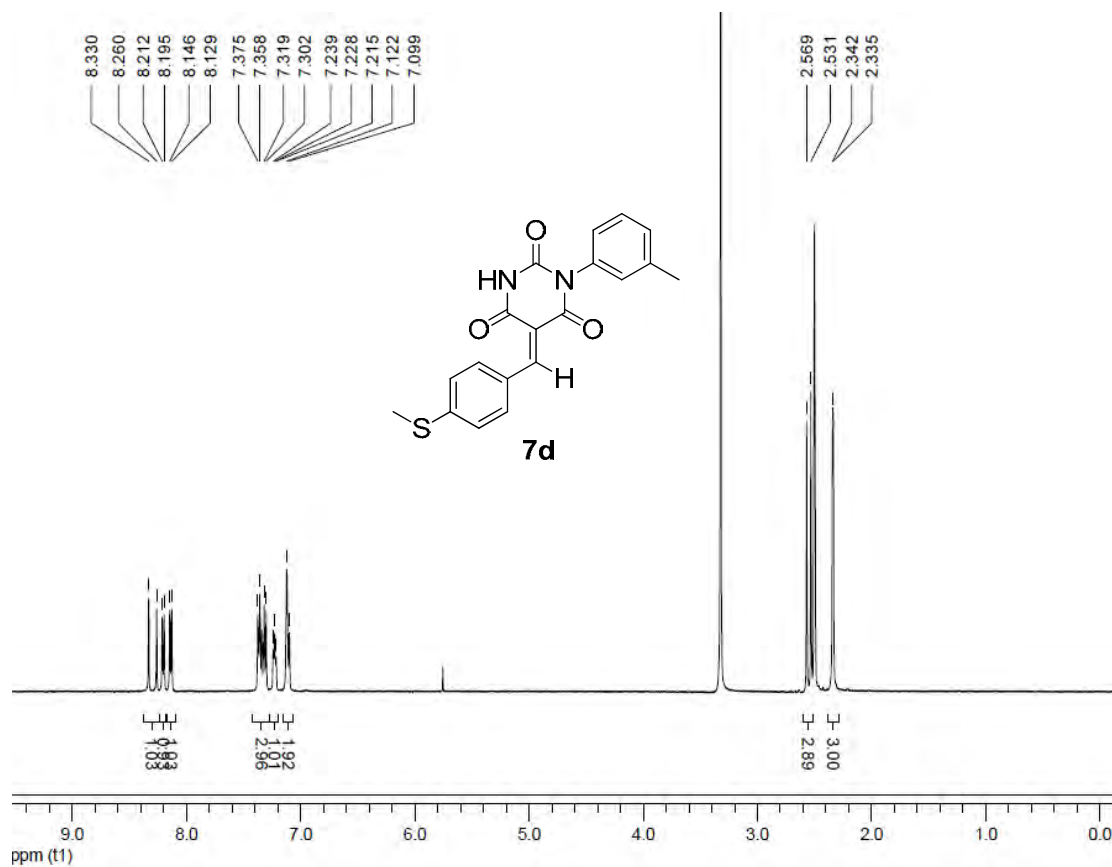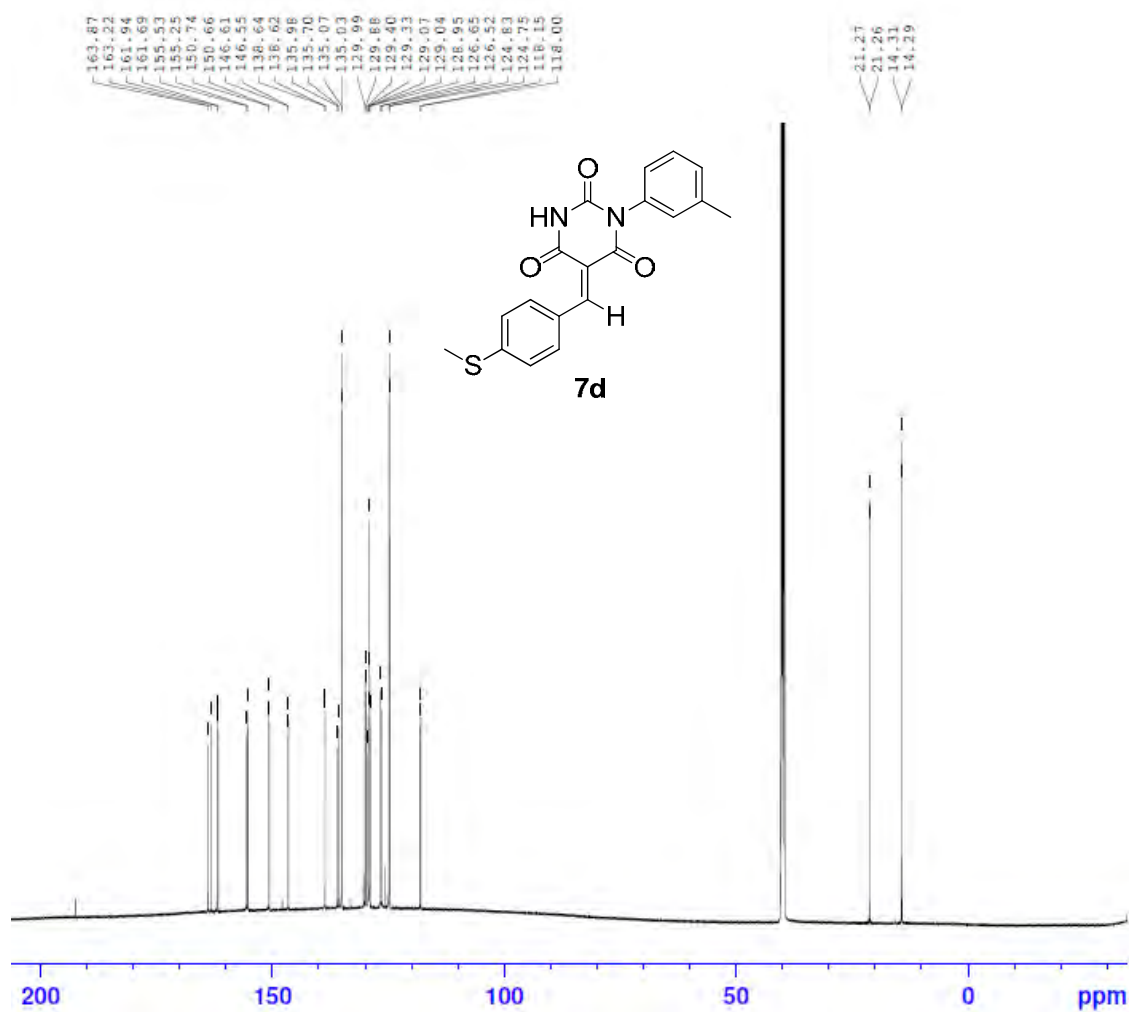

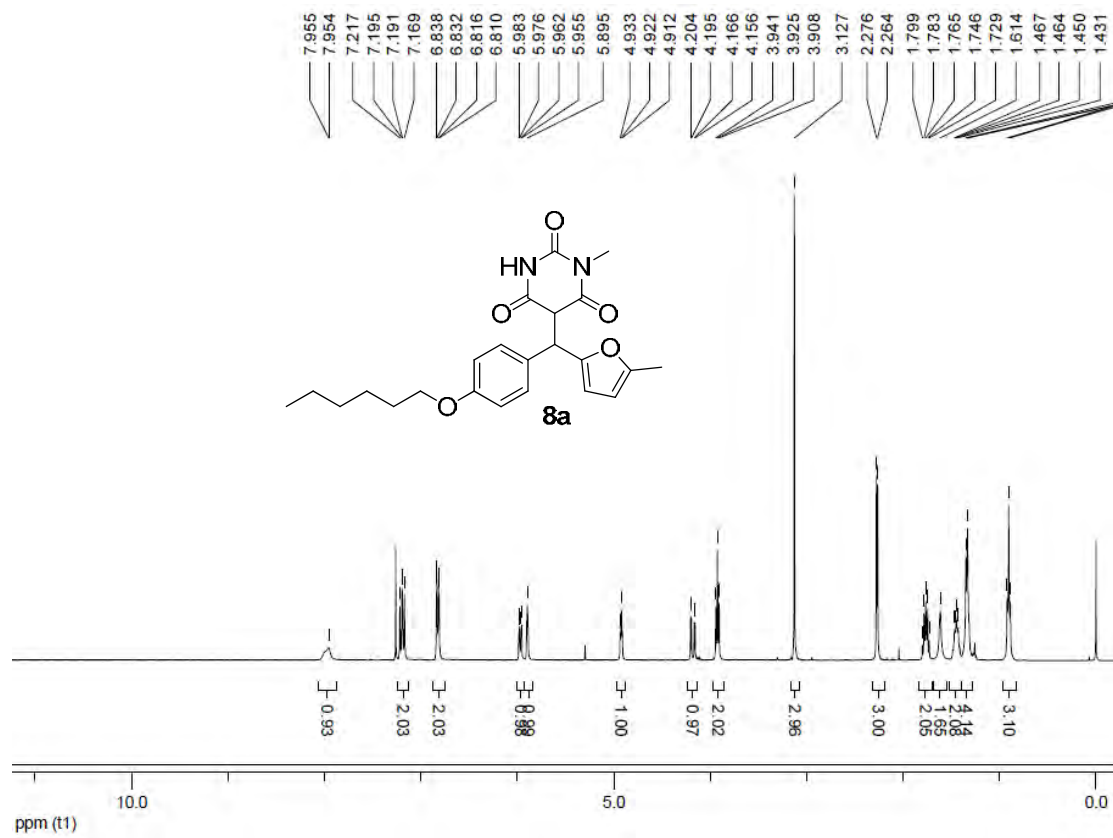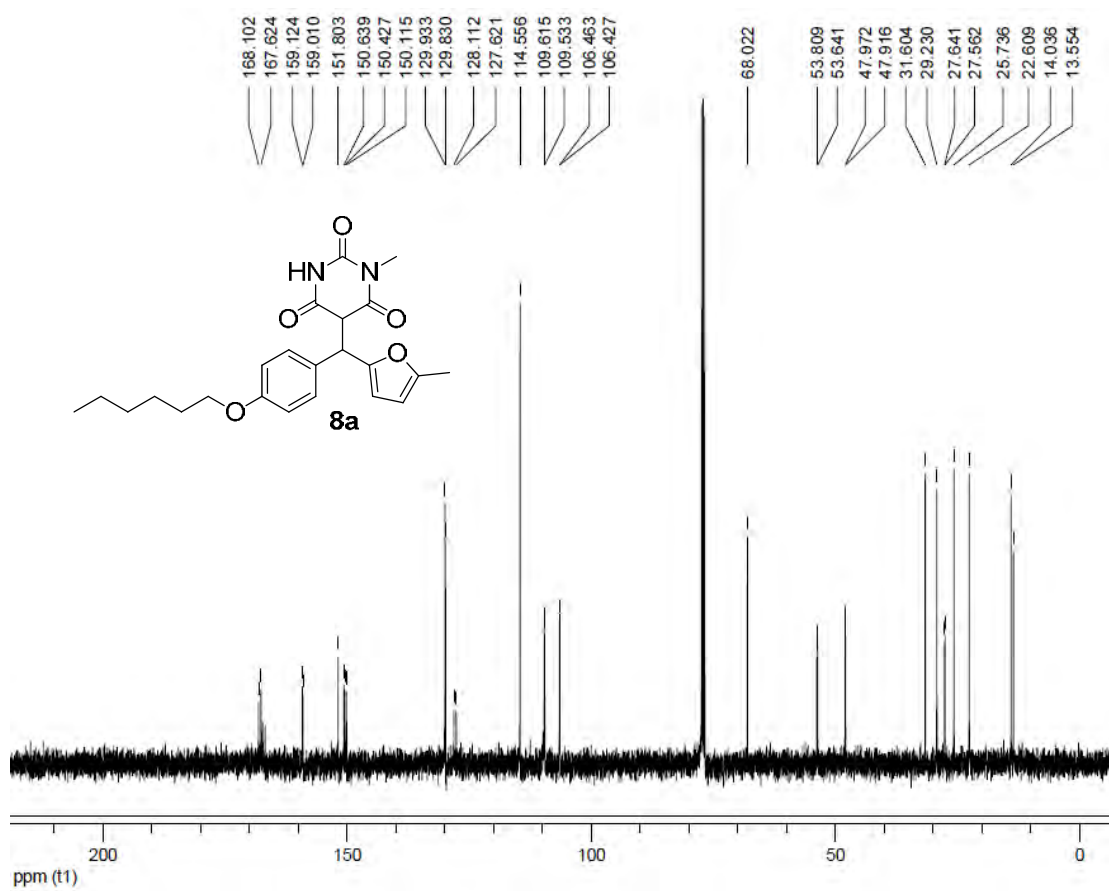

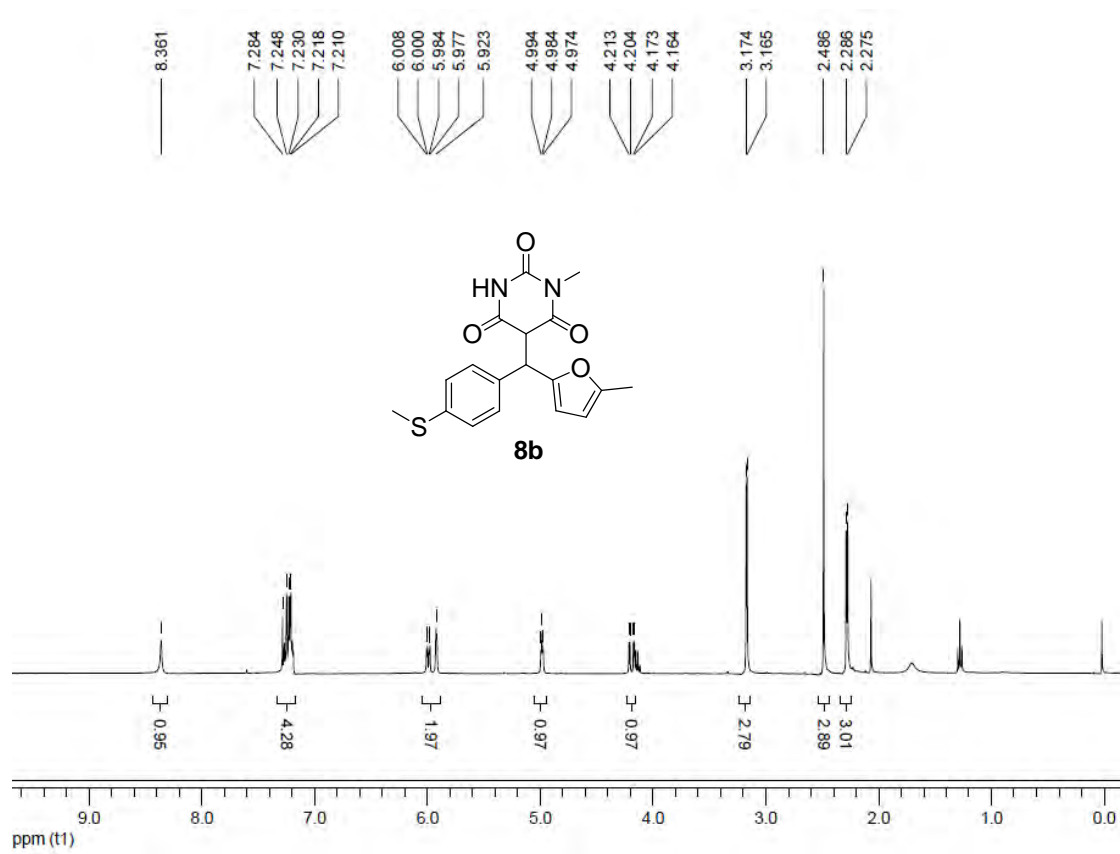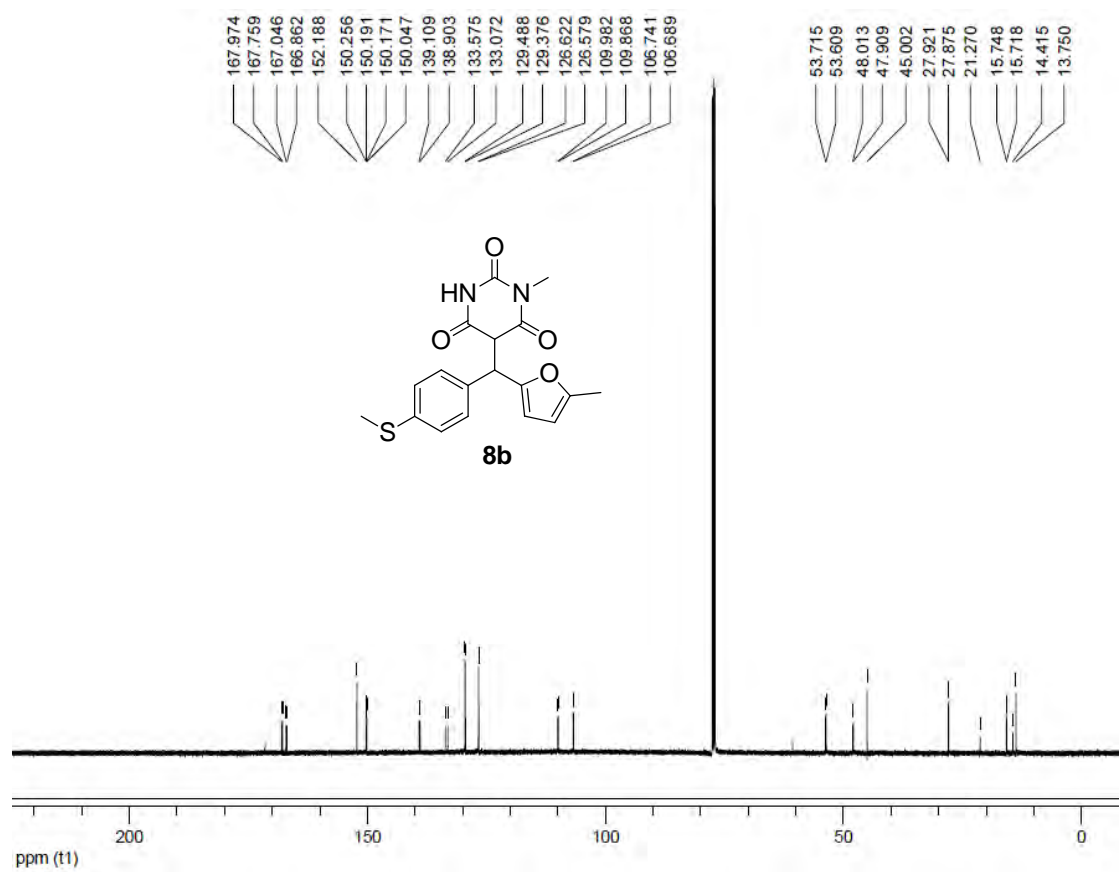

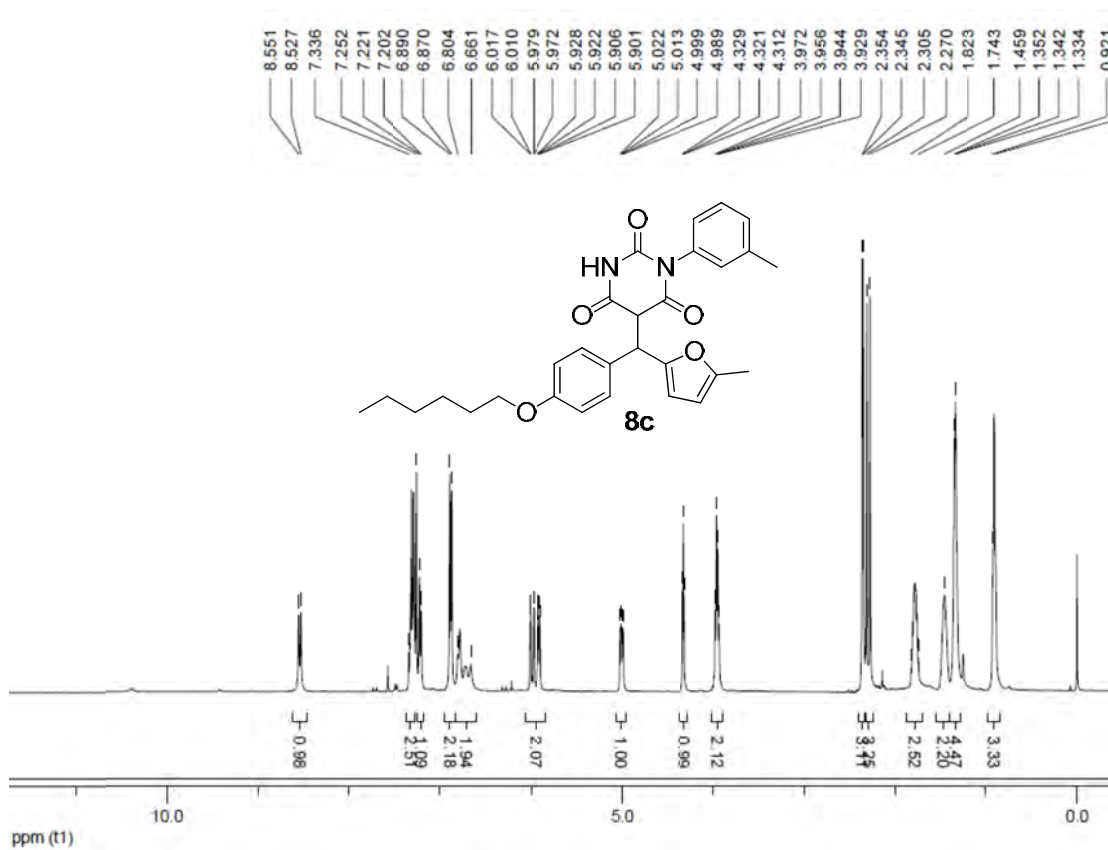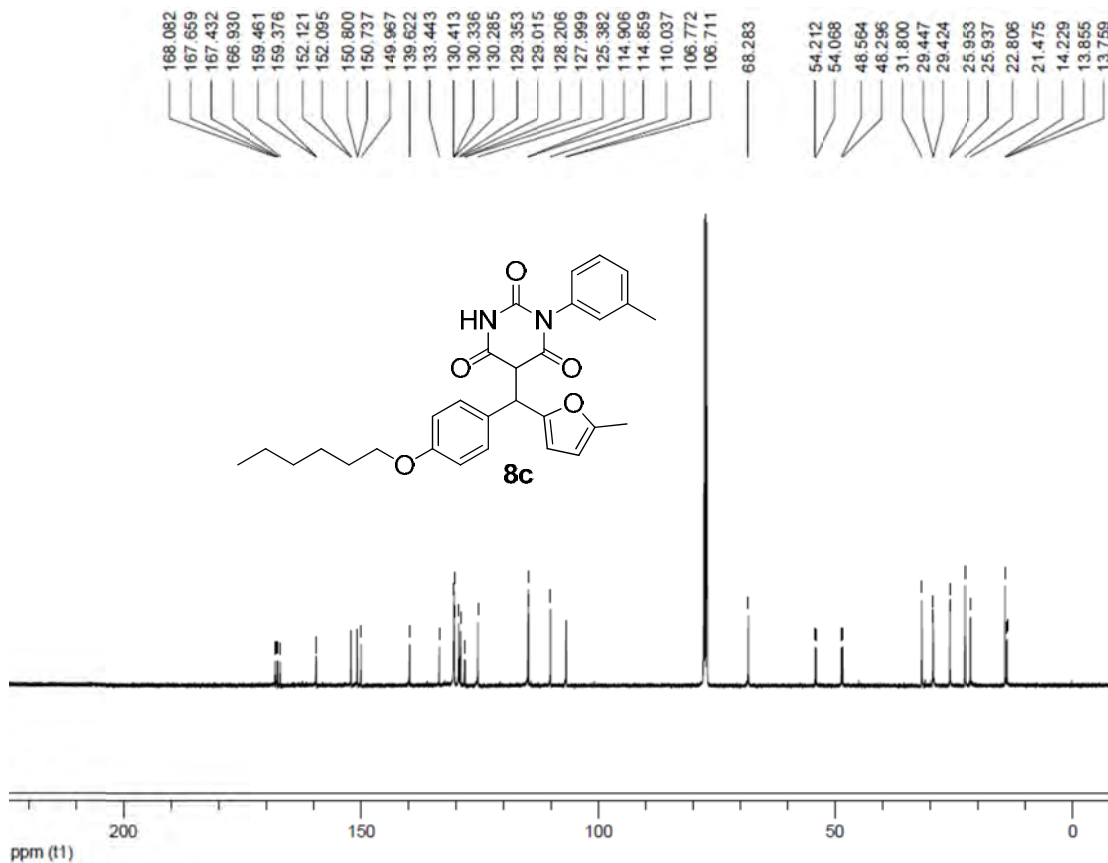

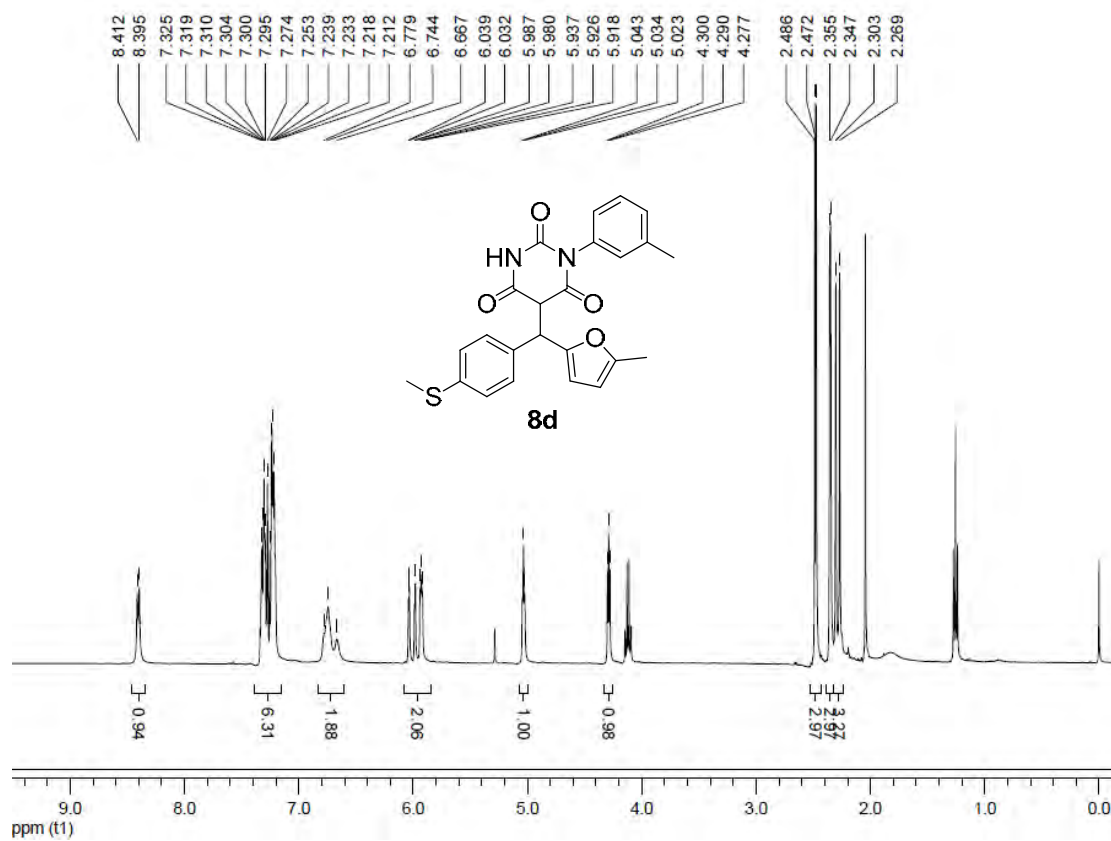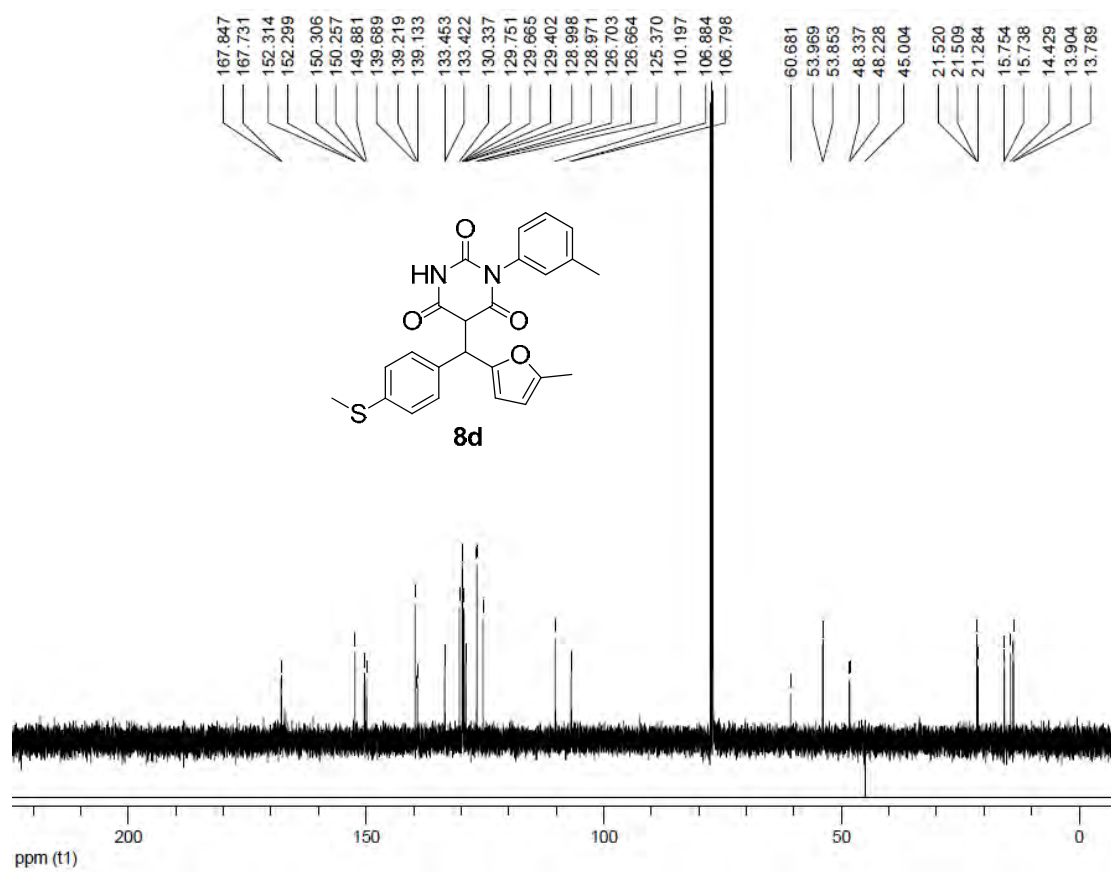

## *X-Ray Crystallography of 1a*

Table 1. Crystal data and structure refinement for BCLKC35 (13 Mar 2013).

|                                   |                                                                                                   |                 |
|-----------------------------------|---------------------------------------------------------------------------------------------------|-----------------|
| Identification code               | lkc35                                                                                             |                 |
| Empirical formula                 | (C <sub>8</sub> H <sub>3</sub> Cl F <sub>6</sub> N <sub>4</sub> O <sub>3</sub> )·H <sub>2</sub> O |                 |
| Formula weight                    | 354.61                                                                                            |                 |
| Temperature                       | 296(2) K                                                                                          |                 |
| Wavelength                        | 0.71073 Å                                                                                         |                 |
| Crystal system                    | Monoclinic                                                                                        |                 |
| Space group                       | P2(1)/n                                                                                           |                 |
| Unit cell dimensions              | a = 5.0503(2) Å                                                                                   | α = 90°.        |
|                                   | b = 18.9742(7) Å                                                                                  | β = 97.537(2)°. |
|                                   | c = 13.6338(5) Å                                                                                  | γ = 90°.        |
| Volume                            | 1295.18(8) Å <sup>3</sup>                                                                         |                 |
| Z                                 | 4                                                                                                 |                 |
| Density (calculated)              | 1.819 Mg/m <sup>3</sup>                                                                           |                 |
| Absorption coefficient            | 0.389 mm <sup>-1</sup>                                                                            |                 |
| F(000)                            | 704                                                                                               |                 |
| Crystal size                      | 0.60 x 0.40 x 0.30 mm <sup>3</sup>                                                                |                 |
| Theta range for data collection   | 1.85 to 29.27°.                                                                                   |                 |
| Index ranges                      | -6<=h<=6, -25<=k<=25, -18<=l<=18                                                                  |                 |
| Reflections collected             | 23780                                                                                             |                 |
| Independent reflections           | 3410 [R(int) = 0.0440]                                                                            |                 |
| Completeness to theta = 29.27°    | 97.0 %                                                                                            |                 |
| Absorption correction             | Semi-empirical from equivalents                                                                   |                 |
| Max. and min. transmission        | 0.7456 and 0.5904                                                                                 |                 |
| Refinement method                 | Full-matrix least-squares on F <sup>2</sup>                                                       |                 |
| Data / restraints / parameters    | 3410 / 0 / 220                                                                                    |                 |
| Goodness-of-fit on F <sup>2</sup> | 1.000                                                                                             |                 |
| Final R indices [I>2sigma(I)]     | R1 = 0.0844, wR2 = 0.2172                                                                         |                 |
| R indices (all data)              | R1 = 0.1113, wR2 = 0.2413                                                                         |                 |
| Extinction coefficient            | 0.016(2)                                                                                          |                 |
| Largest diff. peak and hole       | 0.797 and -0.558 e.Å <sup>-3</sup>                                                                |                 |



Table 2. Atomic coordinates ( $\times 10^4$ ) and equivalent isotropic displacement parameters ( $\text{\AA}^2 \times 10^3$ ) for lkc35.  $U(\text{eq})$  is defined as one third of the trace of the orthogonalized  $U^{ij}$  tensor.

|       | x        | y       | z       | $U(\text{eq})$ |
|-------|----------|---------|---------|----------------|
| Cl(1) | 5384(2)  | 692(1)  | 7024(1) | 71(1)          |
| O(1W) | -502(4)  | 2536(1) | 7099(1) | 56(1)          |
| O(1)  | 69(5)    | 2846(1) | 3379(2) | 64(1)          |
| O(2)  | 9961(5)  | 475(1)  | 3911(2) | 66(1)          |
| N(1)  | 3860(4)  | 1927(1) | 4266(2) | 45(1)          |
| N(2)  | 3011(5)  | 1665(1) | 5914(2) | 45(1)          |
| N(3)  | 749(4)   | 2560(1) | 5032(2) | 46(1)          |
| N(4)  | 6850(5)  | 1331(1) | 3481(2) | 48(1)          |
| C(1)  | 2635(5)  | 2018(1) | 5055(2) | 42(1)          |
| C(2)  | 4830(5)  | 1159(1) | 5945(2) | 44(1)          |
| C(3)  | 6257(5)  | 993(1)  | 5179(2) | 45(1)          |
| C(4)  | 5667(5)  | 1402(1) | 4340(2) | 42(1)          |
| C(5)  | -277(5)  | 2933(1) | 4224(2) | 46(1)          |
| C(6)  | -2026(7) | 3557(2) | 4466(2) | 58(1)          |
| C(7)  | 8784(5)  | 868(2)  | 3322(2) | 48(1)          |
| C(8)  | 9428(6)  | 877(2)  | 2245(2) | 54(1)          |
| F(1)  | -3935(5) | 3679(1) | 3735(2) | 88(1)          |
| F(2)  | -614(6)  | 4130(1) | 4595(2) | 109(1)         |
| F(3)  | -3169(5) | 3446(1) | 5266(2) | 110(1)         |
| F(4)  | 8798(6)  | 1474(2) | 1792(2) | 138(1)         |
| F(5)  | 8169(8)  | 405(2)  | 1738(2) | 173(1)         |
| F(6)  | 11930(5) | 799(2)  | 2210(2) | 109(1)         |

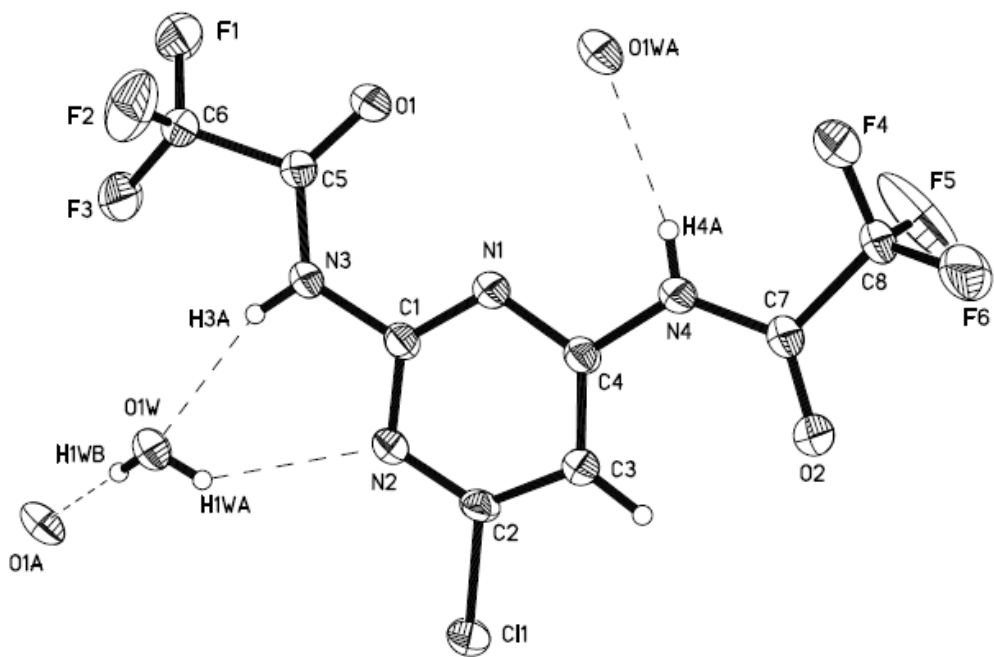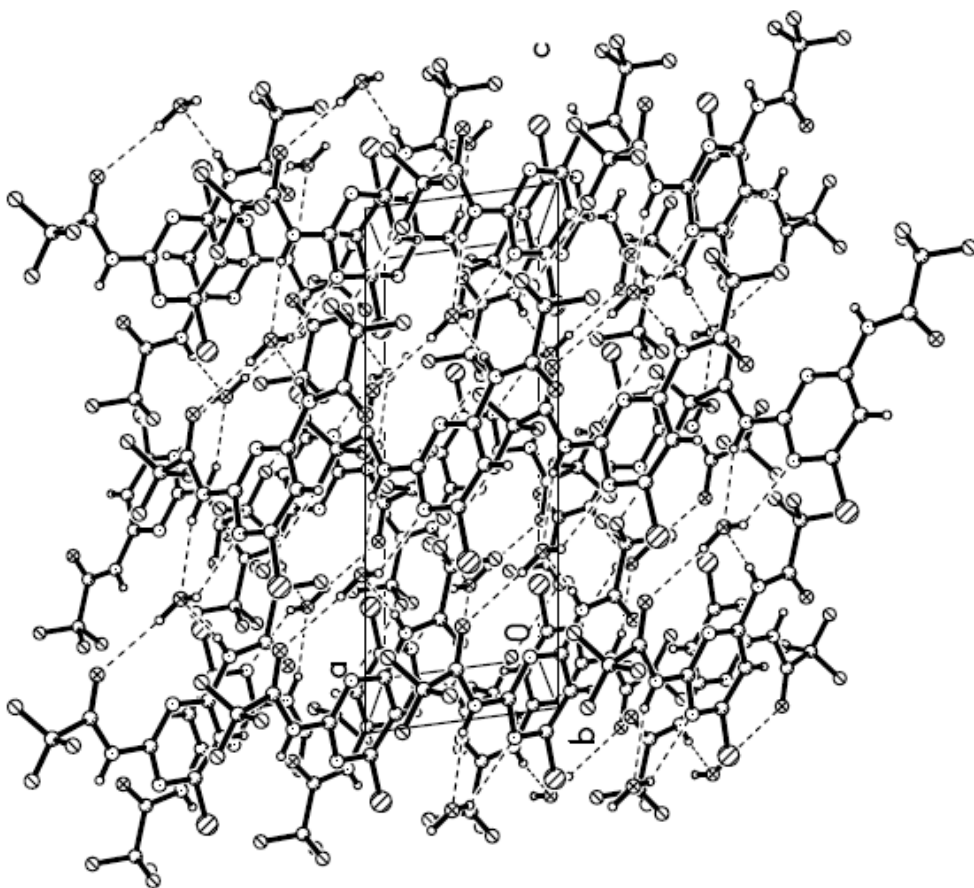

Supplement: c4ra04020a1.pdf [file c4ra04020a1.pdf]
